# Supplementary material for: The transcriptional profiling of human in vivo-generated plasma cells identifies selective imbalances in monoclonal gammopathies
Source: PubMed Central journal article supplement (PMC5560601; doi:10.1371/journal.pone.0183264), 2017-08-17
Supplement: pone.0183264.s003.pdf [file pone.0183264.s003.pdf]

Supplementary Table 1. PC-down and PC-up signatures: Differentially expressed genes (adjusted P-value < 0.1) in the three pair-wise comparisons between each PC and naïve B-cells. Note that genes were compared (and not probesets) in the Venn diagrams.

**PC-DOWN SIGNATURE**

| ProbeName    | log2FC BC / BPC | adj.P-Val BC / BPC | log2FC BC / TPC | adj.P-Val BC / tpc | log2FC BC / BMPC | adj.P-Val BC / BMPC | Gene Symbol | Gene description                                                     | Refseq & others | UNIGENE_ID |
|--------------|-----------------|--------------------|-----------------|--------------------|------------------|---------------------|-------------|----------------------------------------------------------------------|-----------------|------------|
| A 23 P82523  | 0,94            | 0,0674             | 0,93            | 0,0932             | 1,00             | 0,0628              | ABCB1       | ATP-binding cassette, sub-family B (MDR/TAP), member 1               | NM_000927       | Hs.489033  |
| A 23 P74794  | 2,59            | 0,0098             | 3,47            | 0,0005             | 3,29             | 0,0011              | ABCD3       | ATP-binding cassette, sub-family D (ALD), member 3*                  | NM_002858       | Hs.700576  |
| A 23 P166297 | 3,33            | 0,0008             | 3,76            | 0,0001             | 4,01             | 0,0001              | ABCG1       | ATP-binding cassette, sub-family G (WHITE), member 1                 | NM_207627       | Hs.124649  |
| A 23 P211207 | 3,19            | 0,0437             | 2,85            | 0,0975             | 3,26             | 0,0481              | ADARB1      | adenosine deaminase, RNA-specific, B1                                | NM_001112       | Hs.474018  |
| A 23 P361336 |                 |                    |                 |                    | 4,04             | 0,0830              | ADARB1      | adenosine deaminase, RNA-specific, B1 (RED1 homolog rat)             | NM_015833       | Hs.474018  |
| A 24 P260346 | 4,29            | 0,0027             | 4,73            | 0,0008             | 4,50             | 0,0015              | ADH5        | alcohol dehydrogenase 5 (class III), chi polypeptide*                | NM_000671       | Hs.78989   |
| A 23 P127948 | 2,35            | 0,0060             | 1,55            | 0,0872             | 1,52             | 0,0992              | ADM         | adrenomedullin                                                       | NM_001124       | Hs.441047  |
| A 24 P378928 | 5,47            | 0,0114             | 5,39            | 0,0141             | 6,76             | 0,0018              | ADRBK2      | adrenergic, beta, receptor kinase 2*                                 | NM_005160       | Hs.657494  |
| A 23 P373464 | 6,08            | 0,0000             | 5,93            | 0,0000             | 6,12             | 0,0000              | AFK3        | AF4/FMR2 family, member 3                                            | NM_002285       | Hs.444414  |
| A 23 P53152  | 3,10            | 0,0098             | 3,67            | 0,0021             | 3,14             | 0,0094              | AKIP1       | A kinase (PRKA) interacting protein 1                                | NM_020642       | Hs.131180  |
| A 23 P116286 | 1,77            | 0,0355             | 2,03            | 0,0180             | 1,60             | 0,0797              | AMPD3       | adenosine monophosphate deaminase (isoform E)                        | NM_001025390    | Hs.501890  |
| A 24 P304154 | 1,72            | 0,0147             | 1,78            | 0,0122             | 1,50             | 0,0409              | AMPD3       | adenosine monophosphate deaminase 3                                  | NM_001025390    | Hs.501890  |
| A 23 P126706 | 3,92            | 0,0746             | 4,79            | 0,0310             | 4,06             | 0,0830              | ANGPTL1     | angiopoietin-like 1                                                  | NM_004673       | Hs.591474  |
| A 24 P199484 | 4,22            | 0,0042             | 3,58            | 0,0161             | 3,86             | 0,0090              | ANGPTL1     | angiopoietin-like 1                                                  | NM_004673       | Hs.591474  |
| A 24 P306585 | 2,27            | 0,0040             | 1,95            | 0,0140             | 2,37             | 0,0025              | ANKRD18CP   |                                                                      |                 |            |
| A 23 P312565 | 2,74            | 0,0723             | 4,33            | 0,0036             | 4,08             | 0,0067              | ANKRD19P    | ankyrin repeat domain 19, pseudogene                                 | NR_026868       | Hs.643597  |
| A 23 P385295 | 2,09            | 0,0097             | 1,57            | 0,0675             | 1,83             | 0,0286              | AP1S3       | adaptor-related protein complex 1, sigma 3 subunit*                  | BC021898        |            |
| A 23 P15113  | 3,20            | 0,0359             | 3,10            | 0,0524             |                  |                     | ARHGAP17    | Rho GTPase activating protein 17                                     | NM_001006634    | Hs.373793  |
| A 24 P401739 |                 |                    | 5,47            | 0,0777             | 5,33             | 0,0922              | ARHGAP17    | Rho GTPase activating protein 17                                     | NM_001006634    | Hs.373793  |
| A 24 P179516 | 2,61            | 0,0432             | 2,50            | 0,0666             | 2,37             | 0,0923              | ARHGAP25    | Rho GTPase activating protein 25                                     | BC039591        | Hs.531807  |
| A 23 P216517 | 3,45            | 0,0127             | 3,54            | 0,0114             | 2,95             | 0,0420              | ARHGEF39    | chromosome 9 open reading frame 100                                  | NM_032818       | Hs.534579  |
| A 24 P30034  | 2,84            | 0,0045             | 2,88            | 0,0036             | 2,64             | 0,0083              | ARHGEF39    | chromosome 9 open reading frame 100                                  | NM_032818       | Hs.534579  |
| A 24 P921186 | 4,71            | 0,0671             | 5,87            | 0,0236             | 5,53             | 0,0354              | ARL17       | ADP-ribosylation factor-like 17                                      | BC071681        | Hs.559259  |
| A 23 P130965 | 4,84            | 0,0183             | 4,94            | 0,0181             | 5,78             | 0,0051              | ARRDC2      | arrestin domain containing 2                                         | NM_001025604    | Hs.515249  |
| A 23 P31921  | 1,68            | 0,0468             | 2,21            | 0,0089             | 1,86             | 0,0315              | ASS1        | argininosuccinate synthase 1                                         | NM_000050       | Hs.160786  |
| A 23 P48278  | 2,24            | 0,0273             | 2,26            | 0,0305             | 1,95             | 0,0754              | ATF7IP      | activating transcription factor 7 interacting protein                | AK001001        | Hs.714407  |
| A 24 P923757 | 5,35            | 0,0311             | 4,93            | 0,0609             |                  |                     | ATF7IP      | activating transcription factor 7 interacting protein                | NM_018179       | Hs.714407  |
| A 24 P341987 | 2,69            | 0,0588             | 3,30            | 0,0214             | 2,75             | 0,0680              | ATF7IP2     | activating transcription factor 7 interacting protein 2              | NM_024997       | Hs.513343  |
| A 24 P196382 | 3,66            | 0,0054             | 3,00            | 0,0258             | 3,86             | 0,0033              | ATG3        | ATG3 autophagy related 3 homolog (S. cerevisiae)                     | BC002830        | Hs.477126  |
| A 23 P35916  | 4,11            | 0,0302             | 3,47            | 0,0928             | 4,22             | 0,0408              | ATM         | ATM serine/threonine kinase                                          | NM_000051       | Hs.367437  |
| A 23 P257155 | 4,98            | 0,0254             | 5,18            | 0,0237             | 5,15             | 0,0246              | ATXN7       | ataxin 7                                                             | NM_000333       | Hs.476595  |
| A 32 P809435 | 3,01            | 0,0029             | 3,11            | 0,0017             | 3,13             | 0,0018              | AUTS2       | autism susceptibility candidate 2                                    | BC011643        | Hs.654801  |
| A 24 P299034 | 4,21            | 0,0143             | 3,86            | 0,0294             | 3,28             | 0,0784              | BACH1-IT1   | BTB and CNC homology 1, basic leucine zipper transcription factor 1* | NM_001011545    | Hs.154276  |
| A 32 P103771 | 4,91            | 0,0105             | 5,36            | 0,0052             | 5,08             | 0,0088              | BAGE        | B melanoma antigen                                                   | AF527552        | Hs.624543  |
| A 23 P213126 | 1,81            | 0,0718             | 2,30            | 0,0230             | 2,37             | 0,0188              | BMP2K       | BMP2 inducible kinase                                                | AB015331        | Hs.146551  |
| A 23 P334282 | 3,72            | 0,0048             | 2,52            | 0,0744             | 3,45             | 0,0094              | BMP2K       | BMP2 inducible kinase                                                | NM_017593       | Hs.146551  |
| A 23 P99614  | 3,80            | 0,0090             | 3,22            | 0,0317             | 2,99             | 0,0512              | BTBD6       | BTB (POZ) domain containing 6                                        | NM_033271       | Hs.7367    |
| A 32 P404896 | 3,98            | 0,0220             | 4,31            | 0,0143             | 4,65             | 0,0078              | BTBD6P1     |                                                                      |                 |            |
| A 32 P27991  | 3,73            | 0,0063             | 3,45            | 0,0123             | 3,74             | 0,0065              | BUB3        |                                                                      | CR610181        | Hs.663111  |
| A 24 P938516 | 4,03            | 0,0099             | 3,61            | 0,0245             | 3,13             | 0,0606              | C17orf85    | chromosome 17 open reading frame 85                                  | BC011733        | Hs.120963  |
| A 23 P3956   | 1,71            | 0,0390             |                 |                    |                  |                     | C1QTNF1     | C1q and tumor necrosis factor related protein 1                      | NM_198594       | Hs.201398  |
| A 24 P73862  | 2,12            | 0,0785             | 2,29            | 0,0677             | 2,65             | 0,0291              | C1QTNF1     | C1q and tumor necrosis factor related protein 1                      | NM_198594       | Hs.201398  |
| A 23 P87041  | 3,30            | 0,0480             | 3,64            | 0,0321             | 3,28             | 0,0624              | C2CD2L      |                                                                      | THC2655354      |            |
| A 23 P71855  | 3,25            | 0,0376             | 3,65            | 0,0220             | 3,11             | 0,0613              | C5          | complement component 5                                               | NM_001735       | Hs.494997  |
| A 23 P213877 | 1,78            | 0,0344             |                 |                    |                  |                     | C5orf42     | chromosome 5 open reading frame 42                                   | NM_023073       | Hs.643420  |
| A 32 P226009 | 2,06            | 0,0463             | 2,15            | 0,0447             | 2,03             | 0,0639              | C5orf42     | chromosome 5 open reading frame 42                                   | NM_023073       | Hs.643420  |
| A 23 P92928  | 1,41            | 0,0445             | 1,39            | 0,0609             | 1,46             | 0,0458              | C6          | complement component 6                                               | NM_000065       | Hs.481992  |
| A 32 P145159 | 2,21            | 0,0780             | 2,76            | 0,0290             | 2,58             | 0,0449              | C6orf120    |                                                                      |                 |            |
| A 24 P303647 | 3,05            | 0,0123             | 3,09            | 0,0124             | 2,94             | 0,0182              | C7orf60     | chromosome 7 open reading frame 60                                   | NM_152556       | Hs.489734  |
| A 24 P330518 | 2,07            | 0,0890             | 2,47            | 0,0464             | 2,68             | 0,0287              | CA12        | carbonic anhydrase XII                                               | NM_001218       | Hs.210995  |
| A 23 P217570 | 1,93            | 0,0594             | 2,10            | 0,0472             | 2,16             | 0,0411              | CAPN6       | calpain 6                                                            | NM_014289       | Hs.496593  |
| A 23 P52876  | 3,50            | 0,0069             | 2,86            | 0,0319             | 3,00             | 0,0237              | CATSPER1    | cation channel, sperm associated 1                                   | NM_053054       | Hs.189105  |
| A 23 P127117 | 3,61            | 0,0437             | 3,85            | 0,0363             | 3,74             | 0,0451              | CCDC6       | coiled-coil domain containing 6                                      | S72869          | Hs.591360  |
| A 24 P234921 | 1,74            | 0,0098             | 1,55            | 0,0252             | 1,75             | 0,0105              | CCR6        | chemokine (C-C motif) receptor 6                                     | NM_031409       | Hs.46468   |
| A 23 P209055 | 9,02            | 0,0000             |                 |                    | 10,61            | 0,0000              | CD22        | CD22 molecule                                                        | NM_001771       | Hs.579691  |

|              |      |        |      |        |      |        |               |                                                                                   |              |           |
|--------------|------|--------|------|--------|------|--------|---------------|-----------------------------------------------------------------------------------|--------------|-----------|
| A 23 P351286 | 7.97 | 0.0015 |      |        | 6.99 | 0.0048 | CD22          | CD22 molecule                                                                     | AK026467     |           |
| A 24 P254106 | 6.35 | 0.0039 | 4.31 | 0.0629 | 5.22 | 0.0197 | CD22          | CD22 molecule                                                                     | AK026467     |           |
| A 24 P279307 | 3.14 | 0.0132 | 2.54 | 0.0587 | 2.82 | 0.0317 | CD300LF       | CD300 molecule-like family member f                                               | NM_139018    | Hs.567706 |
| A 23 P23829  | 2.14 | 0.0000 | 1.99 | 0.0000 | 2.07 | 0.0000 | CD34          | CD34 molecule                                                                     | NM_001773    | Hs.374990 |
| A 23 P87879  | 3.33 | 0.0029 | 2.65 | 0.0184 | 3.52 | 0.0015 | CD69          | CD69 molecule                                                                     | NM_001781    | Hs.208854 |
| A 23 P70670  | 8.69 | 0.0059 | 6.52 | 0.0479 | 9.55 | 0.0025 | CD83          | CD83 molecule                                                                     | NM_004233    | Hs.595133 |
| A 32 P7502   | 4.91 | 0.0082 | 4.70 | 0.0124 | 5.23 | 0.0051 | CD96          | CD96 molecule                                                                     | NM_198196    | Hs.142023 |
| A 23 P98335  | 1.39 | 0.0993 | 1.90 | 0.0223 | 1.62 | 0.0617 | CDON          | Cdon homolog (mouse)                                                              | NM_016952    | Hs.38034  |
| A 23 P33384  | 2.45 | 0.0711 |      |        |      |        | CIITA         | class II, major histocompatibility complex, transactivator"                       | NM_000246    | Hs.701991 |
| A 23 P353478 | 4.73 | 0.0977 |      |        | 5.05 | 0.0963 | CIITA         | class II, major histocompatibility complex, transactivator"                       | U18259       | Hs.126714 |
| A 24 P923807 | 5.77 | 0.0042 | 5.99 | 0.0026 | 5.51 | 0.0063 | CIITA         | hypothetical LOC730038                                                            | XM_001134271 |           |
| A 32 P209960 | 8.01 | 0.0000 | 6.69 | 0.0003 | 8.30 | 0.0000 | CIITA         | class II, major histocompatibility complex, transactivator                        | NM_000246    | Hs.701991 |
| A 23 P253734 | 3.42 | 0.0859 | 3.88 | 0.0591 | 3.58 | 0.0933 | CLN8          | ceroid-lipofuscinosis, neuronal 8 (epilepsy, progressive with mental retardation) | NM_018941    | Hs.127675 |
| A 23 P310931 | 2.90 | 0.0171 | 3.01 | 0.0147 | 2.80 | 0.0246 | CNR2          | cannabinoid receptor 2 (macrophage)                                               | NM_001841    | Hs.73037  |
| A 23 P134614 | 4.35 | 0.0203 | 3.41 | 0.0953 | 4.32 | 0.0246 | COG5          | component of oligomeric golgi complex 5                                           | NM_006348    | Hs.239631 |
| A 23 P501010 | 2.17 | 0.0075 | 2.18 | 0.0077 | 2.32 | 0.0045 | COL17A1       | collagen, type XVII, alpha 1                                                      | NM_000494    | Hs.117938 |
| A 23 P375922 | 3.06 | 0.0101 | 2.58 | 0.0366 | 2.99 | 0.0135 | COL19A1       | collagen, type XIX, alpha 1                                                       | NM_001858    | Hs.444842 |
| A 23 P204033 | 2.95 | 0.0753 | 3.27 | 0.0570 | 3.42 | 0.0446 | CPSF6         | cleavage and polyadenylation specific factor 6, 68kDa"                            | NM_007007    | Hs.369606 |
| A 23 P16283  | 2.64 | 0.0252 | 2.26 | 0.0754 | 2.26 | 0.0776 | CPT1C         | carnitine palmitoyltransferase 1C                                                 | NM_152359    | Hs.112195 |
| A 23 P256821 | 2.71 | 0.0593 | 3.41 | 0.0180 | 3.43 | 0.0174 | CR1           | complement component (3b/4b) receptor 1 (Knops blood group)                       | NM_000651    | Hs.334019 |
| A 24 P265523 | 3.02 | 0.0060 | 2.78 | 0.0122 | 3.05 | 0.0058 | CR1           | complement component (3b/4b) receptor 1 (Knops blood group)                       | NM_000651    | Hs.334019 |
| A 23 P397671 | 3.39 | 0.0289 | 3.39 | 0.0338 | 3.76 | 0.0176 | CR1L          | complement component (3b/4b) receptor 1 (Knops blood group)                       | NM_000651    | Hs.334019 |
| A 24 P56894  | 4.82 | 0.0085 | 3.77 | 0.0499 | 4.19 | 0.0264 | CRLF3         | cytokine receptor-like factor 3                                                   | NM_015986    | Hs.370168 |
| A 32 P109242 | 1.07 | 0.0442 | 0.97 | 0.0899 | 1.03 | 0.0684 | CSRNP3        |                                                                                   | AK055302     | Hs.609017 |
| A 23 P209625 | 1.01 | 0.0458 | 1.51 | 0.0024 | 1.34 | 0.0080 | CYP1B1        | cytochrome P450, family 1, subfamily B, polypeptide 1                             | NM_000104    | Hs.154654 |
| A 24 P995    | 2.32 | 0.0316 | 2.01 | 0.0851 | 2.22 | 0.0509 | DCAF13        | WD repeats and SOF1 domain containing                                             | AF161549     | Hs.532265 |
| A 23 P311346 | 2.00 | 0.0420 |      |        | 1.93 | 0.0645 | DENND2D       | DENN/MADD domain containing 2D                                                    | AL713773     | Hs.557850 |
| A 23 P85952  | 2.87 | 0.0175 | 2.97 | 0.0155 | 2.73 | 0.0287 | DENND2D       | DENN/MADD domain containing 2D                                                    | NM_024901    | Hs.557850 |
| A 23 P321201 | 1.91 | 0.0098 | 2.01 | 0.0069 | 1.61 | 0.0368 | DENND5A       | DENN/MADD domain containing 5A                                                    | NM_015213    | Hs.501857 |
| A 24 P922808 | 1.67 | 0.0265 | 1.59 | 0.0434 | 1.51 | 0.0604 | DESI2         | family with sequence similarity 152, member A"                                    | BC020640     | Hs.498317 |
| A 23 P54441  | 5.15 | 0.0068 | 5.00 | 0.0091 | 4.56 | 0.0192 | DEXI          | dexamethasone-induced transcript                                                  | NM_014015    | Hs.592051 |
| A 24 P144377 | 5.76 | 0.0026 | 5.21 | 0.0057 | 6.30 | 0.0009 | DEXI          | Dexi homolog (mouse)                                                              | NM_014015    | Hs.592051 |
| A 23 P29118  | 2.88 | 0.0218 | 2.96 | 0.0210 | 2.96 | 0.0217 | DGCR5         | DiGeorge syndrome critical region gene 5 (non-protein coding)                     | NR_002733    | Hs.646438 |
| A 24 P7179   | 4.15 | 0.0152 | 5.26 | 0.0020 | 4.30 | 0.0133 | DIP2A         | DIP2 disco-interacting protein 2 homolog A (Drosophila)                           | NM_206890    | Hs.189585 |
| A 23 P65741  | 4.06 | 0.0389 | 3.97 | 0.0542 | 3.58 | 0.0967 | DIS3L         | DIS3 like exosome 3'-5' exoribonuclease                                           | NM_133375    | Hs.446251 |
| A 24 P128255 | 5.55 | 0.0067 | 4.20 | 0.0506 | 4.57 | 0.0314 | DKFZP586B0319 | DKFZP586B0319 protein                                                             |              | Hs.667735 |
| A 23 P353541 | 1.84 | 0.0661 | 1.94 | 0.0640 | 1.84 | 0.0861 | DLX6          | distal-less homeobox 6                                                            | NM_005222    | Hs.249196 |
| A 23 P213199 | 4.87 | 0.0333 | 4.15 | 0.0953 | 4.93 | 0.0376 | DNAJB14       | DnaJ (Hsp40) homolog, subfamily B, member 14                                      | NM_001031723 | Hs.577426 |
| A 24 P334402 |      |        | 5.84 | 0.0524 |      |        | DNAJB14       | DnaJ (Hsp40) homolog, subfamily B, member 14"                                     | NM_024920    | Hs.577426 |
| A 24 P76158  | 4.09 | 0.0063 | 5.41 | 0.0003 | 4.70 | 0.0017 | DOCK11        | dedicator of cytokinesis 11                                                       | NM_144658    | Hs.368203 |
| A 32 P743184 | 4.04 | 0.0056 | 3.89 | 0.0077 | 3.60 | 0.0150 | DPPA3         | developmental pluripotency associated 3                                           | NM_199286    | Hs.131358 |
| A 32 P73139  | 1.68 | 0.0802 | 2.14 | 0.0267 | 2.16 | 0.0253 | DPY19L2P3     |                                                                                   | BC047708     | Hs.652669 |
| A 23 P99163  | 4.49 | 0.0022 | 3.94 | 0.0065 | 4.19 | 0.0038 | DRAM1         | DNA-damage regulated autophagy modulator 1                                        | NM_018370    | Hs.525634 |
| A 24 P355816 | 4.24 | 0.0046 | 4.26 | 0.0040 | 4.17 | 0.0053 | DRAM1         | damage-regulated autophagy modulator                                              | NM_018370    | Hs.525634 |
| A 23 P54291  | 3.77 | 0.0290 | 3.29 | 0.0755 | 3.26 | 0.0824 | DUOX1         | dual oxidase 1                                                                    | NM_017434    | Hs.272813 |
| A 23 P143650 | 4.68 | 0.0024 | 3.87 | 0.0121 | 4.53 | 0.0030 | DUSP18        | dual specificity phosphatase 18                                                   | NM_152511    | Hs.517544 |
| A 24 P221414 | 2.32 | 0.0130 | 1.96 | 0.0449 | 2.12 | 0.0274 | DYNC111       | dynein, cytoplasmic 1, intermediate chain 1                                       | NM_004411    | Hs.440364 |
| A 24 P315739 | 1.61 | 0.0268 | 1.39 | 0.0753 | 1.35 | 0.0913 | DZANK1        | chromosome 20 open reading frame 12                                               | NM_018152    | Hs.472225 |
| A 23 P9621   | 3.37 | 0.0144 | 3.33 | 0.0178 | 2.99 | 0.0372 | ELF4          | E74-like factor 4 (ets domain transcription factor)                               | NM_001421    | Hs.271940 |
| A 23 P117580 | 3.41 | 0.0060 | 3.77 | 0.0022 | 3.68 | 0.0031 | ENTPD5        | ectonucleoside triphosphate diphosphohydrolase 5                                  | NM_001249    | Hs.131555 |
| A 23 P95599  | 1.68 | 0.0338 | 1.65 | 0.0452 | 1.46 | 0.0899 | ERVK13-1      |                                                                                   | NM_001012731 | Hs.647398 |
| A 32 P195401 | 4.47 | 0.0000 | 4.85 | 0.0000 | 4.96 | 0.0000 | FAM117B       | family with sequence similarity 117, member B                                     | NM_173511    | Hs.471130 |
| A 23 P345799 | 5.61 | 0.0250 | 5.30 | 0.0429 | 6.85 | 0.0067 | FAM129C       | family with sequence similarity 129, member C                                     | NM_173544    | Hs.434133 |
| A 24 P940348 | 4.78 | 0.0496 |      |        | 4.74 | 0.0659 | FAM129C       | family with sequence similarity 129, member C"                                    | NM_173544    | Hs.434133 |
| A 24 P266048 | 3.06 | 0.0065 | 3.14 | 0.0052 | 3.15 | 0.0055 | FAM134B       | family with sequence similarity 134, member B                                     | NM_001034850 | Hs.481704 |
| A 23 P334955 | 1.40 | 0.0220 | 1.37 | 0.0290 | 1.36 | 0.0315 | FAM167A       | family with sequence similarity 167, member A                                     | NM_053279    | Hs.124299 |
| A 23 P432554 | 2.60 | 0.0102 | 2.61 | 0.0107 | 2.49 | 0.0160 | FBXO36        | F-box protein 36                                                                  | NM_174899    | Hs.140666 |
| A 23 P146811 | 4.54 | 0.0014 | 4.27 | 0.0021 | 4.48 | 0.0015 | FBXO38        | F-box protein 38                                                                  | NM_030793    | Hs.483772 |
| A 23 P164773 | 3.84 | 0.0040 | 4.29 | 0.0011 | 4.61 | 0.0006 | FCER2         | Fc fragment of IgE, low affinity II, receptor for (CD23)                          | NM_002002    | Hs.465778 |

|              |      |        |      |        |      |        |          |                                                        |                 |           |
|--------------|------|--------|------|--------|------|--------|----------|--------------------------------------------------------|-----------------|-----------|
| A 23 P149368 | 6.23 | 0.0000 | 5.12 | 0.0000 | 5.83 | 0.0000 | FCRL1    | Fc receptor-like 1                                     | NM_052938       | Hs.656112 |
| A 24 P328259 | 5.01 | 0.0135 | 5.34 | 0.0090 | 6.29 | 0.0020 | FCRL1    | Fc receptor-like 1                                     | NM_052938       | Hs.656112 |
| A 32 P71876  | 6.09 | 0.0000 | 5.56 | 0.0000 | 6.12 | 0.0000 | FCRL1    |                                                        | THC2767659      |           |
| A 23 P160751 | 2.84 | 0.0669 | 3.22 | 0.0426 | 3.55 | 0.0231 | FCRL2    | Fc receptor-like 2                                     | NM_030764       | Hs.437393 |
| A 24 P319647 | 5.67 | 0.0235 | 4.91 | 0.0649 | 4.60 | 0.0943 | FCRL2    | Fc receptor-like 2                                     | NM_030764       | Hs.437393 |
| A 23 P316447 | 3.10 | 0.0076 | 3.02 | 0.0097 | 3.14 | 0.0073 | FGFR1    | fibroblast growth factor receptor 1                    | ENST00000496294 | Hs.264887 |
| A 23 P122210 | 2.28 | 0.0407 | 2.23 | 0.0565 | 2.03 | 0.0949 | FLJ11292 | hypothetical protein FLJ11292                          | AK023417        | Hs.714581 |
| A 23 P3922   | 1.31 | 0.0078 | 1.00 | 0.0543 | 0.94 | 0.0782 | FLJ11710 | hypothetical protein FLJ11710                          | AK021772        | Hs.657294 |
| A 24 P187874 | 4.26 | 0.0036 | 4.31 | 0.0028 | 4.15 | 0.0044 | FLJ40712 | FLJ40712 protein                                       | AK098031        | Hs.683800 |
| A 23 P155257 | 2.70 | 0.0968 | 2.95 | 0.0826 | 3.48 | 0.0325 | FOXP1    | forkhead box P1                                        | NM_032682       | Hs.431498 |
| A 23 P93302  | 5.05 | 0.0019 | 5.35 | 0.0008 | 5.29 | 0.0010 | GABBR1   | gamma-aminobutyric acid (GABA) B receptor, 1           | NM_001470       | Hs.167017 |
| A 24 P910667 | 4.09 | 0.0273 | 4.03 | 0.0359 | 4.91 | 0.0088 | GAF3     | FGF-2 activity-associated protein 3                    | ENST0000062392  | Hs.543647 |
| A 23 P209459 | 1.77 | 0.0004 | 1.33 | 0.0067 | 1.19 | 0.0171 | GALNT3   |                                                        | NM_004482       |           |
| A 23 P88194  | 3.08 | 0.0368 | 2.88 | 0.0647 | 3.04 | 0.0494 | GEMIN2   | survival of motor neuron protein interacting protein 1 | NM_003616       | Hs.708127 |
| A 23 P66774  | 0.80 | 0.0678 | 0.94 | 0.0333 | 0.82 | 0.0761 | GGT6     | gamma-glutamyltransferase 6                            | NM_153338       | Hs.130749 |
| A 32 P39394  | 2.50 | 0.0115 | 2.23 | 0.0290 | 2.37 | 0.0194 | GLIS3    | GLIS family zinc finger 3                              | NM_001042413    | Hs.162125 |
| A 23 P104012 | 2.74 | 0.0083 | 2.81 | 0.0071 | 2.22 | 0.0417 | GNAT2    |                                                        | ENST00000351050 |           |
| A 24 P393679 | 4.63 | 0.0007 | 4.53 | 0.0006 | 4.93 | 0.0002 | GNL1     | guanine nucleotide binding protein-like 1              | AK095071        | Hs.654655 |
| A 32 P19608  | 2.23 | 0.0433 | 2.08 | 0.0769 | 2.58 | 0.0218 | GNPDA2   | glucosamine-6-phosphate deaminase 2                    | AY173948        | Hs.21398  |
| A 32 P217330 | 2.23 | 0.0543 | 2.16 | 0.0800 | 2.31 | 0.0575 | GOSR1    |                                                        | THC2537951      |           |
| A 23 P128808 | 2.79 | 0.0233 | 2.89 | 0.0216 | 2.32 | 0.0824 | GPR132   | G protein-coupled receptor 132                         | NM_013345       | Hs.532504 |
| A 23 P14165  | 5.24 | 0.0000 | 4.81 | 0.0000 | 5.29 | 0.0000 | GPR18    | G protein-coupled receptor 18                          | NM_005292       | Hs.631765 |
| A 23 P143720 | 3.42 | 0.0210 | 3.20 | 0.0374 | 3.17 | 0.0408 | GRAP2    | GRB2-related adaptor protein 2                         | NM_004810       | Hs.517499 |
| A 24 P10884  | 2.20 | 0.0207 | 1.92 | 0.0563 | 1.77 | 0.0899 | GRAP2    | GRB2-related adaptor protein 2                         | NM_004810       | Hs.517499 |
| A 24 P408449 | 3.52 | 0.0004 | 3.45 | 0.0003 | 3.53 | 0.0003 | GRAP2    |                                                        | THC2663668      |           |
| A 24 P567952 | 3.55 | 0.0220 | 3.00 | 0.0689 |      |        | HCG18    | HLA complex group 18                                   | CR606587        | Hs.485041 |
| A 24 P934162 | 3.71 | 0.0056 | 3.51 | 0.0091 | 3.53 | 0.0089 | HCG18    |                                                        | AK128413        | Hs.663638 |
| A 23 P211673 | 1.52 | 0.0028 | 1.13 | 0.0285 | 1.11 | 0.0327 | HDAC10   | SLIT and NTRK-like family, member 2"                   | AY358828        | Hs.320368 |
| A 23 P210048 | 1.72 | 0.0036 | 1.16 | 0.0625 | 1.09 | 0.0868 | HDAC4    | histone deacetylase 4                                  | NM_006037       | Hs.20516  |
| A 23 P309292 | 4.86 | 0.0098 | 4.43 | 0.0214 | 4.12 | 0.0353 | HECTD4   | HECT domain containing E3 ubiquitin protein ligase 4   | NM_001109662    | Hs.695995 |
| A 23 P137503 | 2.68 | 0.0059 | 1.78 | 0.0941 | 1.98 | 0.0536 | HLA3     | HERV-H LTR-associating 3                               | NM_001036645    | Hs.142245 |
| A 23 P154345 | 2.12 | 0.0078 | 2.09 | 0.0093 | 1.67 | 0.0460 | HIBCH    | 3-hydroxyisobutyryl-CoA hydrolase                      | NM_014362       | Hs.656685 |
| A 24 P481844 | 7.32 | 0.0006 | 9.39 | 0.0000 | 9.42 | 0.0000 | HLA-DMB  | major histocompatibility complex, class II, DM beta"   | BC035650        | Hs.654428 |
| A 32 P351968 | 4.08 | 0.0919 |      |        | 5.29 | 0.0292 | HLA-DMB  | major histocompatibility complex, class II, DM beta    | NM_002118       | Hs.654428 |
| A 23 P8108   |      |        |      |        | 3.55 | 0.0743 | HLA-DQB1 | major histocompatibility complex, class II, DQ beta 1  | NM_001243962    | Hs.409934 |
| A 24 P937649 | 5.65 | 0.0104 | 4.39 | 0.0609 | 5.80 | 0.0094 | HLA-DQB1 | major histocompatibility complex, class II, DQ beta 1" | AK097297        | Hs.409934 |
| A 24 P248251 | 1.80 | 0.0254 | 1.80 | 0.0299 | 1.80 | 0.0306 | HLTF     | helicase-like transcription factor                     | NM_139048       | Hs.3068   |
| A 23 P434900 | 3.89 | 0.0022 | 3.68 | 0.0032 | 3.65 | 0.0037 | HN1L     | hematological and neurological expressed 1-like        | NM_144570       | Hs.513261 |
| A 23 P206760 | 3.42 | 0.0098 | 2.52 | 0.0769 | 2.44 | 0.0938 | HP       | haptoglobin                                            | NM_005143       | Hs.513711 |
| A 24 P362969 | 2.09 | 0.0163 | 2.04 | 0.0215 | 1.60 | 0.0933 | HSD17B13 | hydroxysteroid (17-beta) dehydrogenase 13              | NM_178135       | Hs.284414 |
| A 23 P17224  | 4.09 | 0.0172 | 4.03 | 0.0220 | 4.29 | 0.0141 | ICA1L    | islet cell autoantigen 1,69kDa-like                    | NM_138468       | Hs.516629 |
| A 23 P430168 | 3.23 | 0.0063 | 3.27 | 0.0056 | 3.24 | 0.0064 | ICA1L    | islet cell autoantigen 1,69kDa-like                    | ENST0000048456  | Hs.516629 |
| A 24 P211797 | 3.27 | 0.0206 | 2.96 | 0.0452 | 3.15 | 0.0311 | ICA1L    | islet cell autoantigen 1,69kDa-like                    | NM_001288624    | Hs.516629 |
| A 23 P129556 | 6.35 | 0.0000 | 4.09 | 0.0026 | 6.04 | 0.0000 | IL4R     | interleukin 4 receptor                                 | NM_000418       | Hs.513457 |
| A 23 P71037  | 2.70 | 0.0551 | 2.95 | 0.0500 | 3.12 | 0.0368 | IL6      | interleukin 6                                          | NM_000600       | Hs.654458 |
| A 23 P125686 | 1.33 | 0.0625 | 1.47 | 0.0462 | 1.51 | 0.0404 | INGX     | inhibitor of growth family, X-linked, pseudogene       | NR_002226       | Hs.567456 |
| A 23 P61149  | 4.84 | 0.0002 | 3.56 | 0.0038 | 4.25 | 0.0006 | INPP5D   | inositol polyphosphate-5-phosphatase, 145kDa           | NM_001017915    | Hs.601911 |
| A 24 P912074 | 5.66 | 0.0251 |      |        |      |        | INPP5D   | inositol polyphosphate-5-phosphatase, 145kDa"          | AK023492        |           |
| A 23 P8848   | 4.54 | 0.0063 | 5.42 | 0.0011 | 4.43 | 0.0081 | INTS9    | integrator complex subunit 9                           | NM_018250       | Hs.162397 |
| A 23 P202696 | 3.29 | 0.0333 | 3.53 | 0.0256 | 3.46 | 0.0296 | KBTBD4   | kelch repeat and BTB (POZ) domain containing 4         | NM_016506       | Hs.656205 |
| A 24 P135406 | 3.21 | 0.0206 | 3.36 | 0.0172 | 3.94 | 0.0047 | KCTD9    | potassium channel tetramerization domain containing 9  | NM_017634       | Hs.72071  |
| A 24 P102434 | 2.55 | 0.0212 | 2.94 | 0.0084 | 3.16 | 0.0045 | KIAA0922 |                                                        | NM_015196       | Hs.205572 |
| A 32 P61857  | 1.94 | 0.0730 | 2.05 | 0.0690 | 2.05 | 0.0730 | KIAA1468 | KIAA1468                                               | NM_020854       | Hs.465323 |
| A 23 P412764 | 1.89 | 0.0420 | 2.14 | 0.0239 | 2.14 | 0.0244 | KIAA1958 | KIAA1958                                               | ENST00000337531 | Hs.656619 |
| A 23 P122027 | 2.61 | 0.0904 | 2.96 | 0.0622 | 2.72 | 0.0991 | KIF3A    | kinesin family member 3A                               | NM_007054       | Hs.43670  |
| A 23 P120325 | 2.03 | 0.0637 | 2.23 | 0.0479 | 2.34 | 0.0372 | KIF3C    | kinesin family member 3C                               | NM_002254       | Hs.21611  |
| A 32 P154473 | 4.13 | 0.0069 | 3.83 | 0.0134 | 4.07 | 0.0081 | KIF5C    | kinesin family member 5C                               | NM_004522       | Hs.660699 |
| A 32 P33114  | 3.61 | 0.0065 | 3.89 | 0.0032 | 3.54 | 0.0080 | KLB      | klotho beta                                            | NM_175737       | Hs.90756  |
| A 24 P208721 | 4.62 | 0.0058 | 3.73 | 0.0304 | 3.51 | 0.0451 | KLHL18   | kelch-like 18 (Drosophila)                             | NM_025010       | Hs.517946 |

|              |      |        |      |        |      |        |              |                                                                 |                 |           |
|--------------|------|--------|------|--------|------|--------|--------------|-----------------------------------------------------------------|-----------------|-----------|
| A 23 P121527 | 2.23 | 0,0574 | 3,11 | 0,0073 | 2,92 | 0,0128 | KLHL5        | kelch-like family member 5                                      | NM_015990       | Hs.272251 |
| A 23 P218058 | 2,11 | 0,0362 | 1,99 | 0,0609 | 1,87 | 0,0876 | KLRC4        | killer cell lectin-like receptor subfamily C, member 4          | NM_013431       | Hs.387787 |
| A 23 P56898  | 2,99 | 0,0425 | 3,29 | 0,0291 | 3,59 | 0,0162 | KYNU         | kynureninase (L-kynurenine hydrolase)                           | NM_003937       | Hs.470126 |
| A 23 P210445 | 3,43 | 0,0034 | 2,15 | 0,0855 | 2,45 | 0,0425 | L3MBTL1      | l(3)mbt-like 1 (Drosophila)                                     | NM_032107       | Hs.709356 |
| A 23 P311885 | 2,79 | 0,0104 | 2,93 | 0,0075 | 2,77 | 0,0122 | L3MBTL3      | l(3)mbt-like 3 (Drosophila)                                     | NM_032438       | Hs.658051 |
| A 24 P391918 | 3,52 | 0,0127 | 3,72 | 0,0088 | 3,49 | 0,0155 | L3MBTL4      | l(3)mbt-like 4 (Drosophila)                                     | NM_173464       | Hs.128279 |
| A 23 P86283  |      |        |      |        | 3,62 | 0,0509 | LAPTM5       | lysosomal protein transmembrane 5                               | NM_006762       | Hs.371021 |
| A 24 P114124 | 2,20 | 0,0543 | 2,18 | 0,0711 | 2,66 | 0,0217 | LAPTM5       | lysosomal multispanning membrane protein 5                      | NM_006762       | Hs.371021 |
| A 23 P54357  | 1,86 | 0,0229 | 1,76 | 0,0367 | 1,56 | 0,0776 | LDHAL6B      | lactate dehydrogenase A-like 6B                                 | NM_033195       | Hs.307052 |
| A 23 P8452   | 4,13 | 0,0026 | 4,61 | 0,0006 | 4,40 | 0,0012 | LFNG         | LFNG O-fucosylpeptide 3-beta-N-acetylglucosaminyltransferase    | NM_001040167    | Hs.159142 |
| A 23 P149441 | 4,10 | 0,0237 | 4,37 | 0,0183 | 3,37 | 0,0899 | LINC00328    | melanoma antigen                                                | AF172850        | Hs.633593 |
| A 32 P196036 | 1,47 | 0,0092 | 1,29 | 0,0265 | 1,41 | 0,0139 | LINC01128    | hypothetical LOC643837                                          | CR594200        | Hs.133183 |
| A 32 P116606 | 1,42 | 0,0138 | 1,29 | 0,0301 | 1,34 | 0,0234 | LIX1         | Lix1 homolog (chicken)                                          | NM_153234       | Hs.656702 |
| A 24 P400832 | 3,35 | 0,0115 | 2,78 | 0,0445 | 2,49 | 0,0841 | LOC100130950 | uncharacterized LOC100130950                                    | NR_034082       | Hs.668646 |
| A 23 P331908 | 2,40 | 0,0424 | 2,64 | 0,0291 | 2,66 | 0,0280 | LOC101060179 | uncharacterized LOC101060179                                    | XM_003959932    | Hs.178715 |
| A 24 P935310 | 3,16 | 0,0115 | 4,02 | 0,0012 | 2,70 | 0,0376 | LOC222159    | hypothetical protein LOC222159                                  | AK027340        | Hs.561708 |
| A 24 P195936 | 4,49 | 0,0103 | 4,65 | 0,0085 | 4,27 | 0,0171 | LOC440180    | hypothetical LOC440180                                          | XR_018312       | Hs.647575 |
| A 24 P161813 | 2,42 | 0,0191 | 2,04 | 0,0616 | 2,46 | 0,0194 | LOC441666    | zinc finger protein 91 pseudogene                               | NR_024380       |           |
| A 24 P316059 | 2,96 | 0,0297 | 2,66 | 0,0651 | 2,78 | 0,0523 | LOC441768    | hypothetical LOC441768                                          | XR_019199       |           |
| A 24 P910024 | 1,97 | 0,0265 | 1,73 | 0,0680 | 1,80 | 0,0570 | LOC645478    | hypothetical LOC645478                                          | AK055364        | Hs.657558 |
| A 32 P104619 | 5,18 | 0,0028 | 4,15 | 0,0169 | 5,50 | 0,0014 | LOC727820    | hypothetical protein LOC727820                                  | AK094156        | Hs.655890 |
| A 24 P358084 | 2,39 | 0,0131 | 1,99 | 0,0484 | 1,78 | 0,0922 | LOC729602    | NPIP-like protein ENSP00000283050                               | ENST00000532934 | Hs.681787 |
| A 23 P46606  | 3,17 | 0,0331 | 3,81 | 0,0110 | 3,85 | 0,0103 | LPGAT1       | lysophosphatidylglycerol acyltransferase 1                      | NM_014873       | Hs.497674 |
| A 24 P114551 | 4,41 | 0,0194 | 3,78 | 0,0583 | 4,17 | 0,0330 | LPP          | LIM domain containing preferred translocation partner in lipoma | NM_005578       | Hs.444362 |
| A 23 P128447 | 2,13 | 0,0422 | 2,00 | 0,0749 | 2,17 | 0,0480 | LRRK2        | leucine-rich repeat kinase 2                                    | NM_198578       | Hs.187636 |
| A 23 P354074 | 2,68 | 0,0363 | 2,57 | 0,0561 | 3,23 | 0,0128 | LYST         | lysosomal trafficking regulator                                 | NM_000081       | Hs.532411 |
| A 24 P268196 | 1,88 | 0,0199 | 1,90 | 0,0212 | 2,08 | 0,0111 | LZIC         | leucine zipper and CTNBP1 domain containing                     | ENST00000377222 | Hs.327252 |
| A 23 P114445 | 2,63 | 0,0023 | 1,68 | 0,0615 | 1,62 | 0,0778 | MAGEE1       | melanoma antigen family E, 1                                    | NM_020932       | Hs.8453   |
| A 23 P57277  | 2,36 | 0,0128 | 2,34 | 0,0149 | 2,16 | 0,0261 | MAP3K7CL     | MAP3K7 C-terminal like                                          | NM_020152       | Hs.222802 |
| A 24 P237265 | 2,63 | 0,0034 | 2,63 | 0,0029 | 2,39 | 0,0075 | MAPK1        | mitogen-activated protein kinase 1                              | NM_002745       | Hs.431850 |
| A 24 P354412 | 3,94 | 0,0002 | 3,50 | 0,0007 | 3,19 | 0,0021 | MARCH1       |                                                                 | AK091335        | Hs.603066 |
| A 23 P68539  | 2,23 | 0,0003 | 1,91 | 0,0012 | 1,57 | 0,0086 | MAVS         | virus-induced signaling adaptor                                 | ENST00000379561 | Hs.570362 |
| A 23 P212073 | 3,44 | 0,0157 | 3,09 | 0,0363 | 4,01 | 0,0051 | MBNL1        | muscleblind-like (Drosophila)                                   | NM_207296       | Hs.478000 |
| A 23 P7201   | 3,41 | 0,0184 | 3,80 | 0,0091 | 3,71 | 0,0115 | MED28        | mediator complex subunit 28                                     | AF317680        | Hs.434075 |
| A 24 P926960 | 5,51 | 0,0000 | 5,14 | 0,0000 | 5,39 | 0,0000 | MEGF6        | multiple EGF-like-domains 6                                     | NM_001409       | Hs.593645 |
| A 23 P365705 | 3,11 | 0,0077 | 3,75 | 0,0013 | 3,18 | 0,0068 | METTL16      | methyltransferase 10 domain containing                          | NM_024086       | Hs.632237 |
| A 23 P218523 | 3,26 | 0,0095 | 2,66 | 0,0424 | 2,47 | 0,0680 | MFSD12       | chromosome 19 open reading frame 28                             | NM_021731       | Hs.656901 |
| A 24 P153448 | 2,16 | 0,0264 |      |        |      |        | MFSD12       | chromosome 19 open reading frame 28                             | AF218008        | Hs.656901 |
| A 32 P221256 | 4,78 | 0,0327 | 5,89 | 0,0088 | 5,23 | 0,0222 | MGC70870     | C-terminal binding protein 2 pseudogene                         | NR_003682       | Hs.572501 |
| A 23 P300847 | 2,57 | 0,0147 | 2,21 | 0,0449 | 2,10 | 0,0615 | MIR1247      | microRNA 1247                                                   | ENST00000555881 | Hs.525597 |
| A 23 P148439 | 1,96 | 0,0047 | 1,64 | 0,0195 | 1,48 | 0,0399 | MKRN4P       |                                                                 | THC2487640      |           |
| A 23 P127727 | 1,51 | 0,0440 | 1,46 | 0,0656 | 1,45 | 0,0699 | MPEG1        | macrophage expressed 1                                          | AK097881        | Hs.709439 |
| A 32 P187176 | 4,00 | 0,0260 | 3,74 | 0,0472 | 4,28 | 0,0202 | MRRFP1       | mitochondrial ribosome recycling factor                         | NM_138777       | Hs.368011 |
| A 23 P116371 | 5,29 | 0,0000 | 3,04 | 0,0080 | 5,13 | 0,0000 | MS4A1        | membrane-spanning 4-domains, subfamily A, member 1*             | NM_152866       | Hs.712553 |
| A 23 P61426  | 3,34 | 0,0210 | 3,93 | 0,0068 | 3,40 | 0,0221 | MSRA         | methionine sulfoxide reductase A                                | NM_012331       | Hs.490981 |
| A 24 P74828  | 2,48 | 0,0089 | 2,35 | 0,0149 | 2,14 | 0,0287 | MT1JP        | metallothionein 1J (pseudogene)                                 | AF348994        | Hs.513626 |
| A 24 P239176 | 2,89 | 0,0617 | 2,81 | 0,0879 |      |        | MUC4         | mucin 4, cell surface associated                                | NM_018406       | Hs.369646 |
| A 24 P239177 | 2,66 | 0,0231 | 2,31 | 0,0636 |      |        | MUC4         | mucin 4, cell surface associated                                | NM_018406       | Hs.369646 |
| A 24 P239183 | 4,05 | 0,0033 | 3,22 | 0,0207 | 3,18 | 0,0230 | MUC4         | mucin 4, cell surface associated*                               | ENST00000381924 | Hs.369646 |
| A 23 P76151  | 3,72 | 0,0009 | 3,03 | 0,0056 | 3,36 | 0,0021 | NAB2         | NGFI-A binding protein 2 (EGR1 binding protein 2)               | NM_005967       | Hs.159223 |
| A 23 P319153 | 2,04 | 0,0304 | 1,93 | 0,0511 | 1,97 | 0,0457 | NADSYN1      | NAD synthetase 1                                                | AL512694        | Hs.556986 |
| A 23 P427039 | 4,11 | 0,0132 | 4,34 | 0,0095 | 3,40 | 0,0521 | NANP         | N-acetylneuraminic acid phosphatase                             | NM_152667       | Hs.666255 |
| A 24 P101072 | 2,61 | 0,0227 | 2,87 | 0,0136 | 2,30 | 0,0586 | NBPF10       |                                                                 | ENST00000369326 |           |
| A 32 P171181 | 4,61 | 0,0992 |      |        |      |        | NBPF10       | neuroblastoma breakpoint family, member 10                      | NM_001039703    | Hs.515947 |
| A 32 P83465  | 2,61 | 0,0260 | 2,80 | 0,0201 | 2,24 | 0,0795 | NBPF10       | neuroblastoma breakpoint family, member 10                      | NM_001039703    | Hs.515947 |
| A 24 P135061 | 3,00 | 0,0123 | 3,00 | 0,0136 | 2,55 | 0,0422 | NBPF11       | hypothetical protein LOC2000030                                 | NM_183372       | Hs.636561 |
| A 24 P625683 | 3,13 | 0,0244 | 3,16 | 0,0274 | 2,72 | 0,0698 | NBPF17P      |                                                                 | XR_018208       |           |
| A 24 P345081 | 2,90 | 0,0076 | 3,01 | 0,0057 | 2,49 | 0,0259 | NBPF2P       | neuroblastoma breakpoint family, member 3                       | NM_032264       | Hs.325422 |
| A 24 P396889 | 4,02 | 0,0596 | 3,97 | 0,0787 | 3,90 | 0,0897 | NDUFA10      |                                                                 | AK025576        | Hs.658209 |

|              |      |        |      |        |      |        |          |                                                                                 |                 |           |
|--------------|------|--------|------|--------|------|--------|----------|---------------------------------------------------------------------------------|-----------------|-----------|
| A 23 P152873 | 2.21 | 0.0540 |      |        |      |        | NEK8     | NIMA (never in mitosis gene a)-related kinase 8                                 | NM_178170       | Hs.448468 |
| A 24 P99639  | 2.31 | 0.0224 | 2.06 | 0.0520 | 2.32 | 0.0255 | NEK8     | NIMA-related kinase 8                                                           | NM_178170       | Hs.448468 |
| A 24 P356830 | 2.67 | 0.0040 | 2.60 | 0.0046 | 1.99 | 0.0376 | NFIC     |                                                                                 | AK129956        | Hs.170131 |
| A 23 P383422 | 7.33 | 0.0000 | 7.22 | 0.0000 | 6.55 | 0.0000 | NFKBID   | nuclear factor of kappa light polypeptide gene enhancer in B-cells inhibitor, d | NM_139239       | Hs.466531 |
| A 23 P359131 | 6.00 | 0.0039 | 5.87 | 0.0043 | 4.16 | 0.0575 | NIP1A1   | non imprinted in Prader-Willi/Angelman syndrome 1                               | NM_144599       | Hs.511797 |
| A 23 P41021  | 2.53 | 0.0006 | 1.59 | 0.0321 | 1.59 | 0.0336 | NISCH    | nischarin                                                                       | NM_007184       | Hs.435290 |
| A 23 P338519 | 3.37 | 0.0115 | 3.31 | 0.0148 | 3.40 | 0.0122 | NKIRAS1  | NFKB inhibitor interacting Ras-like 1                                           | NM_020345       | Hs.173202 |
| A 32 P5040   | 4.51 | 0.0596 | 5.79 | 0.0155 | 4.31 | 0.0965 | NOTCH2   | Notch homolog 2 (Drosophila) N-terminal like                                    | NM_203458       | Hs.709526 |
| A 32 P75695  | 4.66 | 0.0438 | 5.37 | 0.0191 |      |        | NOTCH2   | Notch homolog 2 (Drosophila) N-terminal like                                    | AK022008        | Hs.655156 |
| A 24 P366777 | 4.30 | 0.0030 | 4.58 | 0.0013 | 3.29 | 0.0248 | NOTCH2NL | Notch homolog 2 (Drosophila) N-terminal like                                    | ENST0000057979  | Hs.709526 |
| A 32 P89087  | 2.34 | 0.0011 | 1.44 | 0.0521 | 1.52 | 0.0385 | NPIP3    |                                                                                 | AL134462        | Hs.632992 |
| A 24 P725891 | 2.25 | 0.0600 |      |        |      |        | NPIP3    | hypothetical LOC100190986                                                       | BC051311        | Hs.648439 |
| A 32 P114268 | 2.21 | 0.0420 | 2.08 | 0.0714 | 2.25 | 0.0467 | NPIP4    |                                                                                 |                 |           |
| A 32 P174151 | 0.99 | 0.0837 |      |        |      |        | NPIP4    | similar to Uncharacterized protein KIAA0220                                     | NR_002603       | Hs.552700 |
| A 23 P339954 | 1.57 | 0.0032 | 1.00 | 0.0753 | 1.11 | 0.0436 | NPIP9    | nuclear pore complex interacting protein family, member B9                      | NM_001287251    | Hs.710214 |
| A 23 P62752  | 2.47 | 0.0310 | 2.15 | 0.0807 | 2.17 | 0.0802 | NPPP     | natriuretic peptide B                                                           | NM_002521       | Hs.219140 |
| A 23 P306867 | 4.44 | 0.0134 | 3.95 | 0.0330 | 4.00 | 0.0315 | NR4A3    | nuclear receptor subfamily 4, group A, member 3                                 | NM_173199       | Hs.279522 |
| A 23 P144208 | 1.99 | 0.0966 | 2.11 | 0.0965 | 2.20 | 0.0811 | OR5H8    |                                                                                 |                 |           |
| A 23 P52868  | 4.61 | 0.0014 | 3.28 | 0.0245 | 3.84 | 0.0074 | OR8G2    | olfactory receptor, family 8, subfamily G, member 2"                            |                 | Hs.381319 |
| A 23 P65386  | 3.18 | 0.0003 | 2.50 | 0.0035 | 1.80 | 0.0457 | OTUB2    | OTU deubiquitinase, ubiquitin aldehyde binding 2                                | NM_023112       | Hs.278815 |
| A 23 P132486 | 3.61 | 0.0179 | 3.04 | 0.0591 | 2.93 | 0.0751 | OXSM     | 3-oxoacyl-ACP synthase, mitochondrial                                           | NM_017897       | Hs.55781  |
| A 24 P69784  | 4.14 | 0.0735 | 4.75 | 0.0452 | 4.20 | 0.0921 | PACS1    | phosphofurin acidic cluster sorting protein 1                                   | NM_018026       | Hs.644326 |
| A 24 P920398 | 3.75 | 0.0555 |      |        | 5.01 | 0.0104 | PARP14   | poly (ADP-ribose) polymerase family, member 14"                                 | NM_017554       | Hs.518203 |
| A 32 P56759  | 3.92 | 0.0069 | 4.81 | 0.0009 | 4.29 | 0.0033 | PARP14   | poly (ADP-ribose) polymerase family, member 14"                                 | NM_017554       | Hs.518203 |
| A 23 P59691  | 1.30 | 0.0064 | 1.04 | 0.0347 | 1.00 | 0.0449 | PAX4     | paired box 4                                                                    | NM_006193       | Hs.129706 |
| A 23 P71624  | 3.46 | 0.0585 | 3.38 | 0.0810 | 4.23 | 0.0220 | PAX5     | paired box 5                                                                    | NM_016734       | Hs.654464 |
| A 24 P555510 | 2.76 | 0.0048 | 2.22 | 0.0271 | 2.75 | 0.0051 | PCM1     | pericentriolar material 1                                                       | NM_006197       | Hs.491148 |
| A 24 P41918  | 6.10 | 0.0005 | 5.57 | 0.0010 | 5.84 | 0.0006 | PCNXL4   | hypothetical protein LOC100130173                                               | BC030714        | Hs.509499 |
| A 23 P149153 | 3.64 | 0.0109 | 3.66 | 0.0113 | 2.90 | 0.0566 | PDE4DIP  | phosphodiesterase 4D interacting protein                                        | NM_022359       | Hs.654651 |
| A 23 P123478 | 3.76 | 0.0923 | 4.26 | 0.0645 | 4.38 | 0.0570 | PDE7A    | phosphodiesterase 7A                                                            | NM_002603       | Hs.584788 |
| A 24 P360529 | 5.11 | 0.0464 | 5.21 | 0.0511 | 4.93 | 0.0724 | PDE7A    | phosphodiesterase 7A                                                            | AF332652        | Hs.584788 |
| A 24 P340112 | 3.50 | 0.0035 | 3.26 | 0.0058 | 3.04 | 0.0114 | PDK3     |                                                                                 | THC2683124      |           |
| A 24 P941666 | 1.31 | 0.0976 |      |        |      |        | PDK3     |                                                                                 | BC038512        | Hs.296031 |
| A 32 P215143 | 3.29 | 0.0216 | 2.70 | 0.0792 |      |        | PDXDC2P  |                                                                                 | THC2598362      |           |
| A 32 P216872 | 3.12 | 0.0748 |      |        | 3.16 | 0.0943 | PDXDC2P  | pyridoxal-dependent decarboxylase domain containing 2, pseudogene               | BX647358        | Hs.513695 |
| A 23 P89589  | 5.13 | 0.0023 | 4.06 | 0.0157 | 4.70 | 0.0048 | PER1     | period circadian clock 1                                                        | NM_002616       | Hs.445534 |
| A 24 P921232 | 5.62 | 0.0155 | 5.41 | 0.0228 | 4.88 | 0.0451 | PEX14    | peroxisomal biogenesis factor 14                                                | BC017848        | Hs.149983 |
| A 23 P259833 | 5.13 | 0.0000 | 5.14 | 0.0000 | 5.17 | 0.0000 | PIK3CD   | phosphoinositide-3-kinase, catalytic, delta polypeptide"                        | NM_005026       | Hs.518451 |
| A 23 P121596 | 3.24 | 0.0432 | 3.45 | 0.0361 | 3.59 | 0.0287 | PPBP     | pro-platelet basic protein (chemokine (C-X-C motif) ligand 7)                   | NM_002704       | Hs.2164   |
| A 23 P15621  | 1.70 | 0.0039 | 1.24 | 0.0420 | 1.15 | 0.0685 | PRAC1    | prostate cancer susceptibility candidate                                        | NM_032391       | Hs.116467 |
| A 23 P137248 | 2.12 | 0.0016 |      |        | 1.22 | 0.0921 | PRKY     | protein kinase, Y-linked, pseudogene                                            | NR_028062       | Hs.632287 |
| A 24 P186030 |      |        | 4.18 | 0.0445 |      |        | PRKY     | protein kinase, Y-linked"                                                       | NM_002760       | Hs.632287 |
| A 23 P80156  | 4.92 | 0.0000 | 5.16 | 0.0000 | 4.82 | 0.0000 | PRMT2    | protein arginine methyltransferase 2                                            | NM_206962       | Hs.154163 |
| A 23 P76851  | 2.02 | 0.0181 | 1.94 | 0.0274 | 1.74 | 0.0540 | PRMT5    | protein arginine methyltransferase 5                                            | NM_001039619    | Hs.367854 |
| A 24 P344307 | 2.43 | 0.0420 | 2.85 | 0.0184 | 2.38 | 0.0592 | PSME3    | proteasome (prosome, macropain) activator subunit 3 (PA28 gamma; Ki)"           | NM_176863       | Hs.152978 |
| A 23 P412029 | 3.49 | 0.0000 | 3.96 | 0.0000 | 3.93 | 0.0000 | PUS10    | pseudouridylylase 10                                                            | NM_144709       | Hs.368348 |
| A 23 P78158  | 3.93 | 0.0584 | 3.77 | 0.0902 | 4.14 | 0.0561 | RABEP1   | rabaptin, RAB GTPase binding effector protein 1                                 | NM_004703       | Hs.592121 |
| A 24 P399174 | 4.22 | 0.0000 | 4.11 | 0.0000 | 4.12 | 0.0000 | RABEP1   | rabaptin, RAB GTPase binding effector protein 1                                 | NM_004703       | Hs.592121 |
| A 24 P945147 | 5.03 | 0.0058 | 4.10 | 0.0285 | 4.67 | 0.0114 | RABEP1   | rabaptin, RAB GTPase binding effector protein 1                                 | NM_004703       | Hs.592121 |
| A 23 P97517  | 4.41 | 0.0108 | 3.56 | 0.0504 | 4.03 | 0.0231 | RALGPS2  | Ral GEF with PH domain and SH3 binding motif 2                                  | NM_018037       | Hs.709811 |
| A 23 P409966 | 3.48 | 0.0030 | 3.17 | 0.0062 | 3.25 | 0.0052 | RAPH1    | Ras association (RalGDS/AF-6) and pleckstrin homology domains 1                 | NM_025252       | Hs.471162 |
| A 23 P331186 | 3.32 | 0.0929 | 3.15 | 0.0009 | 3.27 | 0.0006 | RASGEF1B | RasGEF domain family, member 1B                                                 | NM_152545       | Hs.591696 |
| A 24 P930432 | 3.52 | 0.0004 |      |        |      |        | RASGEF1B | RasGEF domain family, member 1B                                                 | BX648337        | Hs.591696 |
| A 24 P364516 | 2.36 | 0.0224 | 2.16 | 0.0447 | 2.25 | 0.0359 | RCBTB1   | regulator of chromosome condensation (RCC1) and BTB (POZ) domain cont           | NM_018191       | Hs.508021 |
| A 23 P56938  | 5.54 | 0.0200 | 4.68 | 0.0645 | 5.56 | 0.0227 | REL      | v-rel avian reticuloendotheliosis viral oncogene homolog                        | NM_002908       | Hs.631886 |
| A 24 P372625 | 2.36 | 0.0233 | 2.45 | 0.0212 | 2.00 | 0.0752 | RNF141   | ring finger protein 141                                                         | NM_016422       | Hs.44685  |
| A 23 P23542  | 4.47 | 0.0049 | 3.43 | 0.0363 | 3.60 | 0.0277 | RPAP2    | RNA polymerase II associated protein 2                                          | NM_024813       | Hs.444421 |
| A 23 P394562 | 4.03 | 0.0255 | 4.13 | 0.0262 | 3.79 | 0.0458 | RPGR     |                                                                                 | ENST00000339363 |           |
| A 23 P135079 | 2.44 | 0.0001 | 1.70 | 0.0027 | 1.68 | 0.0034 | SARDH    | sarcosine dehydrogenase                                                         | AF095737        | Hs.198003 |

|              |      |        |      |  |        |  |      |  |          |                                                                                |                |           |
|--------------|------|--------|------|--|--------|--|------|--|----------|--------------------------------------------------------------------------------|----------------|-----------|
| A 24 P115507 | 1,75 | 0,0763 |      |  |        |  |      |  | SARDH    | sarcosine dehydrogenase                                                        | NM_007101      | Hs.198003 |
| A 23 P98446  | 3,46 | 0,0016 | 2,91 |  | 0,0074 |  | 3,27 |  | SC5D     | sterol-C5-desaturase (ERG3 delta-5-desaturase homolog, S. cerevisiae)-like     | NM_001024956   | Hs.287749 |
| A 24 P162319 | 2,08 | 0,0200 | 2,28 |  | 0,0119 |  | 2,08 |  | SCML1    | sex comb on midleg-like 1 (Drosophila)                                         | NM_001037540   | Hs.109655 |
| A 24 P393181 | 1,97 | 0,0117 | 1,70 |  | 0,0359 |  | 1,81 |  | SCN11A   | sodium channel, voltage-gated, type XI, alpha subunit*                         | AF150882       | Hs.591657 |
| A 23 P76006  | 2,54 | 0,0336 | 2,67 |  | 0,0296 |  | 2,52 |  | SERPINH1 | serpin peptidase inhibitor, clade H (heat shock protein 47), member 1, (collag | NM_001235      | Hs.596449 |
| A 23 P361448 | 3,01 | 0,0009 | 2,59 |  | 0,0033 |  | 2,96 |  | SESN3    | sestrin 3                                                                      | NM_144665      | Hs.659934 |
| A 24 P918706 | 1,62 | 0,0825 |      |  |        |  |      |  | SESN3    |                                                                                | THC2534144     |           |
| A 23 P13946  | 6,01 | 0,0035 | 6,64 |  | 0,0011 |  | 5,83 |  | SH2B3    | SH2B adaptor protein 3                                                         | NM_005475      | Hs.506784 |
| A 23 P100730 | 3,62 | 0,0142 | 2,82 |  | 0,0747 |  | 2,82 |  | SKAP1    | src kinase associated phosphoprotein 1                                         | NM_003726      | Hs.316931 |
| A 23 P205910 | 3,68 | 0,0459 | 3,91 |  | 0,0390 |  | 3,32 |  | SLC24A1  | solute carrier family 24 (sodium/potassium/calcium exchanger), member 1*       | NM_004727      | Hs.173092 |
| A 24 P401921 | 2,42 | 0,0229 | 2,16 |  | 0,0525 |  | 1,93 |  | SLC24A1  | solute carrier family 24 (sodium/potassium/calcium exchanger), member 1*       | AB014602       | Hs.173092 |
| A 23 P201248 | 5,23 | 0,0043 | 5,28 |  | 0,0035 |  | 5,16 |  | SLC26A9  | solute carrier family 26 (anion exchanger), member 9                           | NM_052934      | Hs.164073 |
| A 23 P139669 | 6,23 | 0,0388 |      |  |        |  |      |  | SLC2A3   | solute carrier family 2 (facilitated glucose transporter), member 3            | NM_006931      | Hs.419240 |
| A 24 P81900  | 5,32 | 0,0204 | 4,52 |  | 0,0629 |  | 6,01 |  | SLC2A3   | solute carrier family 2 (facilitated glucose transporter), member 3            | NM_006931      | Hs.419240 |
| A 23 P56494  | 3,51 | 0,0189 | 3,52 |  | 0,0210 |  | 3,61 |  | SLC38A11 | solute carrier family 38, member 11                                            | NM_173512      | Hs.658702 |
| A 23 P62070  | 2,05 | 0,0034 | 1,28 |  | 0,0887 |  | 1,31 |  | SLC6A19  | solute carrier family 6 (neutral amino acid transporter), member 19*           | AK096054       | Hs.481478 |
| A 23 P48936  | 2,30 | 0,0278 | 2,45 |  | 0,0220 |  | 2,19 |  | SMAD3    | SMAD family member 3                                                           | NM_005902      | Hs.716490 |
| A 24 P942604 | 3,51 | 0,0599 | 3,91 |  | 0,0408 |  | 4,18 |  | SMC1A    | structural maintenance of chromosomes 1A                                       | NM_006306      | Hs.211602 |
| A 32 P218806 | 3,50 | 0,0788 | 4,43 |  | 0,0269 |  | 4,10 |  | SNAPC3   |                                                                                | AK024516       | Hs.657178 |
| A 23 P21776  | 2,13 | 0,0792 | 2,15 |  | 0,0973 |  | 2,40 |  | SNAPC5   | small nuclear RNA activating complex, polypeptide 5, 19kDa                     | ENST0000031663 | Hs.30174  |
| A 24 P219757 | 5,04 | 0,0007 | 5,39 |  | 0,0002 |  | 4,35 |  | SNRPA    |                                                                                | THC2673303     |           |
| A 24 P150665 | 4,36 | 0,0248 | 3,67 |  | 0,0796 |  | 5,25 |  | SNX29    | RUN domain containing 2A                                                       | NM_032167      | Hs.458401 |
| A 32 P107002 |      |        |      |  |        |  | 6,20 |  | SNX29    | sorting nexin 29                                                               | NM_032167      | Hs.658149 |
| A 32 P66020  | 4,06 | 0,0448 |      |  |        |  | 6,03 |  | SNX29    | sorting nexin 29                                                               | NM_032167      | Hs.658149 |
| A 24 P497464 | 3,42 | 0,0003 | 3,10 |  | 0,0007 |  | 2,48 |  | SOX9-AS1 | SOX9 antisense RNA 1                                                           | NR_103738      | Hs.657374 |
| A 23 P209712 | 1,61 | 0,0440 |      |  |        |  |      |  | SP100    | SP100 nuclear antigen                                                          | CR749288       | Hs.369056 |
| A 24 P916816 | 3,95 | 0,0000 | 3,64 |  | 0,0000 |  | 3,99 |  | SP100    | SP100 nuclear antigen                                                          | L79989         |           |
| A 24 P256526 | 4,70 | 0,0128 | 4,54 |  | 0,0184 |  | 4,82 |  | SP2      | Sp2 transcription factor                                                       | BC005914       | Hs.514276 |
| A 32 P50655  | 1,65 | 0,0335 | 1,71 |  | 0,0324 |  | 1,52 |  | SPPL2A   |                                                                                | THC2637707     | Hs.595314 |
| A 24 P136838 | 3,72 | 0,0181 | 3,73 |  | 0,0203 |  | 4,11 |  | SPPL3    | signal peptide peptidase 3                                                     | NP500659       | Hs.683964 |
| A 23 P107048 | 1,56 | 0,0023 | 1,23 |  | 0,0160 |  | 1,05 |  | SUMO2    |                                                                                | BC002811       | Hs.679409 |
| A 24 P1910   | 4,11 | 0,0634 | 3,93 |  | 0,0996 |  | 4,24 |  | SUPT4H1  | suppressor of Ty 4 homolog 1 (S. cerevisiae)                                   | NM_003168      | Hs.439481 |
| A 23 P42451  | 2,38 | 0,0436 |      |  |        |  | 2,62 |  | SYNE1    | spectrin repeat containing, nuclear envelope 1*                                | AB051543       | Hs.12967  |
| A 24 P410453 | 2,69 | 0,0134 | 2,63 |  | 0,0173 |  | 2,46 |  | SYNE1    | spectrin repeat containing, nuclear envelope 1*                                | NM_033071      | Hs.12967  |
| A 24 P109069 | 2,24 | 0,0666 |      |  |        |  |      |  | SYT15    | synaptotagmin XV                                                               | NM_181519      | Hs.696346 |
| A 32 P67904  | 2,15 | 0,0408 | 2,19 |  | 0,0449 |  | 2,36 |  | SYT15    | synaptotagmin XV                                                               | AK131036       | Hs.696346 |
| A 23 P60047  | 2,71 | 0,0760 | 3,53 |  | 0,0210 |  | 2,72 |  | TACC1    | transforming, acidic coiled-coil containing protein 1                          | NM_006283      | Hs.279245 |
| A 24 P191750 | 4,49 | 0,0040 | 3,69 |  | 0,0197 |  | 5,06 |  | TAPT1    | transmembrane anterior posterior transformation 1                              | NM_153365      | Hs.479223 |
| A 23 P20139  | 2,05 | 0,0103 | 2,12 |  | 0,0085 |  | 1,87 |  | TAS2R3   | taste receptor, type 2, member 3                                               | NM_016943      | Hs.676011 |
| A 23 P62684  | 2,92 | 0,0076 | 2,36 |  | 0,0375 |  | 2,39 |  | TCEANC2  |                                                                                | AF217973       |           |
| A 23 P205348 | 3,48 | 0,0599 |      |  |        |  |      |  | TCL6     | T-cell leukemia/lymphoma 6 (non-protein coding)                                | NR_028288      | Hs.510368 |
| A 23 P363203 | 2,58 | 0,0155 | 2,22 |  | 0,0471 |  | 2,40 |  | TCL6     | T-cell leukemia/lymphoma 6 (non-protein coding)                                | NR_028288      | Hs.510368 |
| A 23 P80974  | 0,91 | 0,0825 | 1,13 |  | 0,0314 |  | 0,98 |  | TDO2     | tryptophan 2,3-dioxygenase                                                     | NM_005651      | Hs.183671 |
| A 23 P166964 | 2,34 | 0,0976 | 2,97 |  | 0,0354 |  | 2,78 |  | TFDP2    | transcription factor Dp-2 (E2F dimerization partner 2)                         | NM_006286      | Hs.379018 |
| A 24 P414169 | 2,35 | 0,0362 | 2,52 |  | 0,0281 |  |      |  | TFDP2    |                                                                                | BC040991       | Hs.379018 |
| A 23 P76267  | 3,74 | 0,0144 | 3,33 |  | 0,0351 |  | 3,29 |  | TMEM119  | transmembrane protein 119                                                      | NM_181724      | Hs.449718 |
| A 24 P931889 | 2,54 | 0,0115 | 1,92 |  | 0,0757 |  | 1,84 |  | TMEM131  |                                                                                | CD691495       | Hs.469376 |
| A 23 P39550  | 2,90 | 0,0239 | 2,67 |  | 0,0472 |  | 2,96 |  | TMEM163  | transmembrane protein 163                                                      | NM_030923      | Hs.369471 |
| A 23 P94552  | 6,76 | 0,0017 | 5,59 |  | 0,0089 |  | 6,78 |  | TMEM2    | transmembrane protein 2                                                        | NM_013390      | Hs.494146 |
| A 24 P261125 | 6,09 | 0,0000 | 5,80 |  | 0,0000 |  | 5,70 |  | TMEM2    | transmembrane protein 2                                                        | NM_013390      | Hs.494146 |
| A 24 P510138 | 1,82 | 0,0240 | 2,00 |  | 0,0148 |  | 2,00 |  | TMEM232  |                                                                                | AK093222       | Hs.670269 |
| A 24 P256583 | 2,26 | 0,0155 | 1,80 |  | 0,0726 |  | 2,04 |  | TMEM65   | transmembrane protein 65                                                       | NM_194291      | Hs.187646 |
| A 23 P14174  | 2,88 | 0,0039 | 2,14 |  | 0,0369 |  | 2,54 |  | TNFSF13B | tumor necrosis factor (ligand) superfamily, member 13b                         | NM_006573      | Hs.525157 |
| A 23 P404134 | 3,08 | 0,0244 | 3,35 |  | 0,0161 |  | 3,73 |  | TOX4     | TOX high mobility group box family member 4                                    | ENST0000044879 | Hs.555910 |
| A 23 P209426 | 2,98 | 0,0103 | 3,47 |  | 0,0027 |  | 3,40 |  | TRAK2    | trafficking protein, kinesin binding 2                                         | NM_015049      | Hs.152774 |
| A 32 P194915 | 6,02 | 0,0000 | 5,82 |  | 0,0000 |  | 4,97 |  | TRAPPC5  |                                                                                | THC2648197     |           |
| A 23 P99360  | 3,56 | 0,0063 | 3,33 |  | 0,0112 |  | 2,66 |  | TRIM13   | tripartite motif containing 13                                                 | NM_213590      | Hs.436922 |
| A 23 P203498 | 3,62 | 0,0503 |      |  |        |  | 4,50 |  | TRIM22   | tripartite motif-containing 22                                                 | NM_006074      | Hs.501778 |
| A 24 P172481 | 3,85 | 0,0047 | 3,03 |  | 0,0301 |  | 4,22 |  | TRIM22   | tripartite motif containing 22                                                 | NM_006074      | Hs.501778 |

|              |      |        |      |        |      |        |              |                                                   |              |           |
|--------------|------|--------|------|--------|------|--------|--------------|---------------------------------------------------|--------------|-----------|
| A 23 P124190 | 4.86 | 0.0074 | 4.47 | 0.0151 | 4.49 | 0.0151 | TRIM34       | tripartite motif containing 34                    | NM_130390    | Hs.125300 |
| A 24 P153853 | 2.95 | 0.0036 | 3.02 | 0.0024 | 3.11 | 0.0020 | TRIM37       | tripartite motif containing 37                    | NM_001005207 | Hs.579079 |
| A 23 P29985  | 2.96 | 0.0092 | 2.93 | 0.0105 | 2.10 | 0.0921 | TRMT44       | tRNA methyltransferase 44 homolog (S. cerevisiae) | AK022953     | Hs.566191 |
| A 24 P461547 | 2.78 | 0.0467 | 3.18 | 0.0253 | 2.81 | 0.0553 | TSC22D2      |                                                   |              |           |
| A 24 P221869 | 4.24 | 0.0031 | 4.30 | 0.0023 | 4.35 | 0.0022 | TSPY10       | similar to testis specific protein, Y-linked 1    | AK093413     | Hs.556121 |
| A 24 P179277 | 3.67 | 0.0132 | 3.46 | 0.0226 | 2.88 | 0.0709 | TSPYL1       | TSPY-like 1                                       | AK096882     | Hs.458358 |
| A 23 P92517  | 2.81 | 0.0024 | 1.95 | 0.0408 | 1.85 | 0.0569 | TTC29        | tetratricopeptide repeat domain 29                | NM_031956    | Hs.378893 |
| A 23 P401098 | 3.33 | 0.0107 | 3.06 | 0.0220 | 3.05 | 0.0229 | TTC39C       | tetratricopeptide repeat domain 39C               | NM_153211    | Hs.653395 |
| A 32 P123629 | 2.33 | 0.0634 | 2.59 | 0.0447 | 2.51 | 0.0559 | TTC39C       | tetratricopeptide repeat domain 39C               | NM_001292030 | Hs.653395 |
| A 23 P40156  | 2.01 | 0.0757 | 2.41 | 0.0359 | 2.20 | 0.0635 | TTPAL        | tocopherol (alpha) transfer protein-like          | NM_024331    | Hs.283869 |
| A 23 P143926 | 1.12 | 0.0206 | 1.26 | 0.0097 | 0.91 | 0.0813 | ULK4         | unc-51-like kinase 4 (C. elegans)                 | BC014794     | Hs.656192 |
| A 32 P209582 | 1.62 | 0.0240 | 1.63 | 0.0277 | 1.59 | 0.0323 | UNQ6228      | hypothetical LOC100131541                         | THC2663167   |           |
| A 23 P207736 | 3.15 | 0.0871 | 3.40 | 0.0769 |      |        | USP36        |                                                   | AK023077     | Hs.464243 |
| A 24 P367864 | 5.13 | 0.0213 |      |        | 5.40 | 0.0176 | USP36        | ubiquitin specific peptidase 36                   | BC038983     | Hs.464243 |
| A 23 P146468 | 3.45 | 0.0159 | 3.33 | 0.0228 | 3.34 | 0.0227 | VAV2         | vav 2 guanine nucleotide exchange factor          | NM_003371    | Hs.369921 |
| A 24 P64895  | 4.90 | 0.0004 | 5.17 | 0.0002 | 5.25 | 0.0001 | WDFY2        |                                                   | THC2781306   |           |
| A 24 P102920 | 3.52 | 0.0010 | 2.83 | 0.0075 | 2.90 | 0.0063 | WDR33        | WD repeat domain 33                               | NM_001006622 | Hs.620490 |
| A 23 P211302 | 3.77 | 0.0284 | 4.94 | 0.0039 | 3.97 | 0.0248 | WDR4         | WD repeat domain 4                                | NM_033661    | Hs.248815 |
| A 24 P943429 | 3.29 | 0.0058 | 2.94 | 0.0148 | 2.79 | 0.0224 | WNK1         |                                                   |              |           |
| A 23 P4283   | 3.30 | 0.0185 | 3.08 | 0.0332 | 3.42 | 0.0167 | XAF1         | XIAP associated factor 1                          | NM_017523    | Hs.441975 |
| A 23 P4286   | 4.35 | 0.0017 | 3.03 | 0.0314 | 3.30 | 0.0181 | XAF1         | XIAP associated factor 1                          | NM_017523    | Hs.441975 |
| A 24 P538708 | 3.25 | 0.0543 | 3.31 | 0.0609 | 3.25 | 0.0699 | ZDHHC21      |                                                   | AK124263     | Hs.649522 |
| A 23 P100959 | 2.07 | 0.0048 | 1.59 | 0.0347 | 1.46 | 0.0601 | ZFP3         | zinc finger protein 3 homolog (mouse)             | NM_153018    | Hs.48832  |
| A 23 P94063  | 1.46 | 0.0046 | 0.98 | 0.0749 | 0.94 | 0.0992 | ZKSCAN1      | zinc finger with KRAB and SCAN domains 1          | AY260738     | Hs.615360 |
| A 24 P11100  | 4.27 | 0.0181 | 3.97 | 0.0334 | 3.88 | 0.0394 | ZMAT1        | zinc finger, matrin-type 1                        | NM_001282400 | Hs.496512 |
| A 23 P104146 | 3.41 | 0.0073 | 4.61 | 0.0003 | 3.91 | 0.0021 | ZMYM4        | zinc finger, MYM-type 4                           | NM_005095    | Hs.269211 |
| A 23 P131834 | 3.33 | 0.0778 | 1.33 | 0.0305 | 1.64 | 0.0309 | ZMYND8       |                                                   | THC2485189   |           |
| A 23 P215806 | 2.56 | 0.0923 | 2.70 | 0.0918 | 3.00 | 0.0536 | ZNF117       | zinc finger protein 117                           | NM_024498    | Hs.250693 |
| A 23 P325661 | 3.72 | 0.0000 | 3.80 | 0.0000 | 3.74 | 0.0000 | ZNF134       | zinc finger protein 134                           | NM_003435    | Hs.469694 |
| A 24 P16950  | 2.16 | 0.0853 |      |        |      |        | ZNF160       | zinc finger protein 160                           | NM_198893    | Hs.655967 |
| A 24 P401241 | 2.43 | 0.0250 | 2.00 | 0.0901 | 2.80 | 0.0109 | ZNF160       | zinc finger protein 160                           | NM_198893    | Hs.655967 |
| A 23 P108129 | 2.08 | 0.0016 | 1.38 | 0.0394 | 1.93 | 0.0030 | ZNF223       | zinc finger protein 223                           | NM_013361    | Hs.279840 |
| A 32 P144908 | 2.82 | 0.0238 | 2.72 | 0.0221 | 2.71 | 0.0231 | ZNF254       | zinc finger protein 254                           | NM_203282    | Hs.434406 |
| A 24 P247512 | 3.04 | 0.0009 | 1.67 | 0.0857 | 1.83 | 0.0553 | ZNF283       | zinc finger protein 283                           | AK098175     | Hs.652513 |
| A 24 P409670 | 4.22 | 0.0000 | 2.67 | 0.0016 | 3.04 | 0.0004 | ZNF283       | zinc finger protein 283                           | AK098175     | Hs.652513 |
| A 24 P204043 | 5.90 | 0.0016 | 5.49 | 0.0027 | 4.88 | 0.0087 | ZNF318       | zinc finger protein 318                           | NM_014345    | Hs.509718 |
| A 23 P38813  | 2.61 | 0.0270 | 2.97 | 0.0133 | 3.27 | 0.0062 | ZNF320       | zinc finger protein 320                           | NM_207333    | Hs.446907 |
| A 23 P433690 | 9.01 | 0.0012 |      |        |      |        | ZNF331       | zinc finger protein 331                           | NM_018555    | Hs.185674 |
| A 23 P50376  | 6.45 | 0.0000 | 3.54 | 0.0088 | 5.06 | 0.0002 | ZNF331       | zinc finger protein 331                           | NM_018555    | Hs.185674 |
| A 23 P258124 | 3.74 | 0.0109 | 3.60 | 0.0160 | 3.44 | 0.0225 | ZNF346       | zinc finger protein 346                           | NM_012279    | Hs.484259 |
| A 23 P208259 | 2.36 | 0.0011 | 2.23 | 0.0016 | 2.41 | 0.0007 | ZNF347       | zinc finger protein 347                           | NM_032584    | Hs.467239 |
| A 23 P95736  |      |        |      |        | 3.71 | 0.0752 | ZNF429       | zinc finger protein 429                           | NM_001001415 | Hs.709598 |
| A 32 P106944 | 2.82 | 0.0614 | 3.03 | 0.0517 | 2.77 | 0.0868 | ZNF429       | zinc finger protein 429                           | NM_001001415 | Hs.709598 |
| A 23 P5234   | 2.22 | 0.0551 | 2.23 | 0.0666 | 2.48 | 0.0372 | ZNF43        | zinc finger protein 43                            | NM_003423    | Hs.534365 |
| A 23 P56304  | 2.76 | 0.0339 | 3.07 | 0.0210 | 3.16 | 0.0170 | ZNF430       | zinc finger protein 430                           | NM_025189    | Hs.466289 |
| A 23 P39441  | 2.71 | 0.0373 | 2.81 | 0.0361 | 2.77 | 0.0412 | ZNF431       | zinc finger protein 431                           | NM_133473    | Hs.687547 |
| A 24 P470079 | 3.67 | 0.0144 | 3.46 | 0.0245 | 3.41 | 0.0274 | ZNF440       |                                                   | AK021474     | Hs.418192 |
| A 24 P109854 | 3.18 | 0.0006 | 2.24 | 0.0137 | 2.73 | 0.0024 | ZNF468       | zinc finger protein 468                           | NM_199132    | Hs.467223 |
| A 24 P16249  | 2.37 | 0.0189 | 1.96 | 0.0679 | 2.54 | 0.0131 | ZNF479       | zinc finger protein 479                           | NM_033273    | Hs.616660 |
| A 23 P354942 | 2.54 | 0.0059 | 2.44 | 0.0085 | 2.56 | 0.0056 | ZNF493       | zinc finger protein 493                           | NM_001076678 | Hs.656558 |
| A 24 P332862 | 1.95 | 0.0366 |      |        | 1.96 | 0.0453 | ZNF493       | zinc finger protein 493                           | NM_001076678 | Hs.656558 |
| A 24 P74329  |      |        |      |        | 3.59 | 0.0576 | ZNF493       | zinc finger protein 493                           | NM_001076678 | Hs.656558 |
| A 23 P35576  | 2.88 | 0.0355 | 3.02 | 0.0312 | 3.02 | 0.0324 | ZNF518A      | zinc finger protein 518A                          | NM_014803    | Hs.600823 |
| A 23 P108342 | 2.88 | 0.0178 | 2.76 | 0.0271 | 2.56 | 0.0449 | ZNF571       | zinc finger protein 571                           | NM_016536    | Hs.590944 |
| A 23 P90223  | 2.60 | 0.0172 | 2.85 | 0.0096 | 3.04 | 0.0057 | ZNF585B      | zinc finger protein 585B                          | NM_152279    | Hs.631552 |
| A 23 P4850   | 3.01 | 0.0019 | 1.75 | 0.0918 | 1.92 | 0.0586 | ZNF625       | zinc finger protein 625                           | NM_145233    | Hs.512823 |
| A 32 P182473 | 2.93 | 0.0171 |      |        |      |        | ZNF625       | zinc finger protein 625                           | NM_145233    | Hs.512823 |
| A 24 P344537 | 3.54 | 0.0000 | 1.94 | 0.0167 | 1.98 | 0.0148 | ZNF625-ZNF20 | zinc finger protein 625                           | NM_145233    | Hs.512823 |
| A 23 P379142 |      |        |      |        | 3.24 | 0.0914 | ZNF626       | zinc finger protein 626                           | NM_145297    | Hs.657001 |

|              |      |        |      |        |      |        |         |                                    |                 |           |
|--------------|------|--------|------|--------|------|--------|---------|------------------------------------|-----------------|-----------|
| A_32_P102778 | 2.55 | 0.0335 | 2.98 | 0.0139 | 2.71 | 0.0275 | ZNF626  | zinc finger protein 626            | NM_001076675    | Hs.657001 |
| A_32_P14669  | 2.24 | 0.0476 | 2.31 | 0.0487 | 2.55 | 0.0273 | ZNF66   | zinc finger protein 66             | AK131420        | Hs.658748 |
| A_24_P341292 | 2.84 | 0.0065 | 2.65 | 0.0122 | 3.01 | 0.0041 | ZNF665  | zinc finger protein 665            | NM_024733       | Hs.590980 |
| A_23_P101623 | 4.01 | 0.0000 | 1.98 | 0.0156 | 2.45 | 0.0025 | ZNF667  | zinc finger protein 667            | NM_022103       | Hs.712574 |
| A_23_P339687 | 2.62 | 0.0218 | 2.74 | 0.0187 | 2.85 | 0.0141 | ZNF675  | zinc finger protein 675            | NM_138330       | Hs.264345 |
| A_24_P118862 | 2.52 | 0.0657 | 2.76 | 0.0512 | 2.80 | 0.0485 | ZNF678  | zinc finger protein 678            | NM_178549       | Hs.656372 |
| A_23_P337923 | 2.35 | 0.0692 | 2.43 | 0.0753 |      |        | ZNF680  | zinc finger protein 680            | NM_178558       | Hs.520886 |
| A_32_P189845 | 2.51 | 0.0200 | 2.40 | 0.0312 | 2.61 | 0.0182 | ZNF680  | zinc finger protein 680            | NM_178558       | Hs.520886 |
| A_23_P375517 | 2.49 | 0.0628 | 2.73 | 0.0480 | 2.97 | 0.0291 | ZNF681  | zinc finger protein 681            | NM_138286       | Hs.399952 |
| A_24_P91405  | 3.50 | 0.0004 | 2.37 | 0.0151 | 2.37 | 0.0160 | ZNF709  | zinc finger protein 709            | NM_152601       | Hs.631623 |
| A_23_P50834  | 2.26 | 0.0341 | 2.00 | 0.0817 | 2.38 | 0.0309 | ZNF714  | zinc finger protein 714            | NM_182515       | Hs.466291 |
| A_24_P19268  | 2.67 | 0.0197 | 2.58 | 0.0291 | 2.64 | 0.0253 | ZNF714  | zinc finger protein 714            | NM_182515       | Hs.466291 |
| A_24_P204639 | 2.69 | 0.0333 | 2.82 | 0.0293 | 2.91 | 0.0242 | ZNF716  | zinc finger protein 716            | ENST0000033142  | Hs.533121 |
| A_24_P919733 | 2.59 | 0.0039 | 2.18 | 0.0156 | 2.49 | 0.0053 | ZNF721  | hypothetical protein LOC152719     | AK021514        | Hs.428360 |
| A_24_P929640 | 4.73 | 0.0076 | 4.26 | 0.0183 | 3.31 | 0.0873 | ZNF724P |                                    | THC2504595      |           |
| A_24_P15965  | 2.70 | 0.0181 | 2.47 | 0.0365 | 2.88 | 0.0133 | ZNF726  | zinc finger protein 254            | NM_203282       | Hs.434406 |
| A_32_P212939 | 3.74 | 0.0489 | 4.93 | 0.0091 | 4.38 | 0.0230 | ZNF726  |                                    | XR_015409       | Hs.655305 |
| A_32_P46191  | 2.79 | 0.0085 | 2.41 | 0.0269 | 2.59 | 0.0166 | ZNF727  | zinc finger protein 727            | NM_001159522    | Hs.640774 |
| A_24_P161696 | 2.41 | 0.0193 |      |        | 2.11 | 0.0513 | ZNF729  | similar to hCG1773661              | ENST0000035882  | Hs.531629 |
| A_24_P126491 |      |        | 2.48 | 0.0904 |      |        | ZNF729  | zinc finger protein 729            | NM_001242680    | Hs.653115 |
| A_24_P161696 |      |        | 2.21 | 0.0381 |      |        | ZNF729  | similar to hCG1773661              | ENST0000035882  | Hs.531629 |
| A_24_P281801 | 2.38 | 0.0221 | 2.17 | 0.0449 | 2.43 | 0.0222 | ZNF732  | zinc finger protein 732            | NM_001137608    | Hs.698668 |
| A_23_P28042  | 2.35 | 0.0139 | 2.00 | 0.0449 | 2.29 | 0.0192 | ZNF737  | zinc finger protein 737            | NM_001159293    |           |
| A_32_P68148  | 2.49 | 0.0296 | 2.49 | 0.0357 | 2.86 | 0.0141 | ZNF738  | zinc finger protein 738            | NR_027130       |           |
| A_24_P58857  | 2.74 | 0.0561 |      |        | 3.15 | 0.0315 | ZNF813  | zinc finger protein 813            | NM_001004301    | Hs.710780 |
| A_32_P3998   | 2.19 | 0.0445 | 1.98 | 0.0937 | 2.52 | 0.0229 | ZNF813  | zinc finger protein 813            | NM_001004301    | Hs.710780 |
| A_32_P54531  | 2.75 | 0.0102 | 2.47 | 0.0249 | 3.07 | 0.0044 | ZNF826P | zinc finger protein 826            | NM_001039884    | Hs.631635 |
| A_23_P67702  | 2.39 | 0.0163 | 2.15 | 0.0362 | 2.47 | 0.0146 | ZNF85   | zinc finger protein 85             | NM_003429       | Hs.37138  |
| A_24_P153207 | 4.64 | 0.0000 | 2.49 | 0.0018 | 2.92 | 0.0003 | ZNF850  | zinc finger protein 850 pseudogene | CR627133        | Hs.406307 |
| A_23_P124585 | 2.87 | 0.0046 | 2.23 | 0.0314 | 2.71 | 0.0076 | ZNF93   | zinc finger protein 93             | AK096342        | Hs.301059 |
| A_23_P135826 | 3.80 | 0.0015 | 2.99 | 0.0122 | 3.70 | 0.0017 | ZNF93   | zinc finger protein 93             | AK096342        | Hs.301059 |
| A_23_P158885 | 2.24 | 0.0722 |      |        | 2.99 | 0.0166 | ZNF93   | zinc finger protein 93             | AK096342        | Hs.301059 |
| A_24_P160927 | 2.30 | 0.0214 | 2.22 | 0.0311 | 2.52 | 0.0131 | ZNF962P |                                    | ENST00000305570 |           |
| A_24_P194971 | 2.65 | 0.0192 | 2.76 | 0.0160 | 3.07 | 0.0068 | ZNF98   | zinc finger protein 492            | ENST0000035509  | Hs.232108 |
| A_23_P396570 | 2.85 | 0.0871 | 3.24 | 0.0586 |      |        | ZNF99   | zinc finger protein 99             | BC021822        | Hs.568380 |

**PC-UP SIGNATURE**

| ProbeName    | log2FC BPC / BC | adj.P-Vai BPC / BC | log2FC TPC / BC | adj.P-Vai TPC / BC | log2FC BMPC / BC | adj.P-Vai BMPC / BC | Gene Symbol | Gene description                                        | Refseq & others | UNIGENE_ID |
|--------------|-----------------|--------------------|-----------------|--------------------|------------------|---------------------|-------------|---------------------------------------------------------|-----------------|------------|
| A_23_P207650 | 2.61            | 0.0802             | 3.69            | 0.0122             | 4.28             | 0.0033              | ACADVL      | acyl-CoA dehydrogenase, very long chain                 | NM_000018       | Hs.437178  |
| A_23_P14389  | 2.30            | 0.0103             | 2.20            | 0.0158             | 2.27             | 0.0126              | ACIN1       | apoptotic chromatin condensation inducer 1              | NM_014977       | Hs.124490  |
| A_23_P120594 | 3.39            | 0.0047             | 3.50            | 0.0032             | 2.91             | 0.0167              | ACSS1       | acyl-CoA synthetase short-chain family member 1         | NM_032501       | Hs.529353  |
| A_23_P44037  | 5.06            | 0.0450             |                 |                    |                  |                     | ACTG1       | actin, gamma 1*                                         | NM_001614       | Hs.514581  |
| A_32_P156963 | 6.79            | 0.0013             | 4.16            | 0.0591             | 5.03             | 0.0182              | ACTG1       | actin gamma 1                                           | NM_001614       | Hs.514581  |
| A_32_P175198 | 2.58            | 0.0193             |                 |                    |                  |                     | ACTG1       | actin, gamma 1*                                         | NM_001614       | Hs.514581  |
| A_24_P850172 | 2.89            | 0.0031             | 2.18            | 0.0288             | 2.36             | 0.0171              | ACTG1P16    |                                                         | XM_926717       |            |
| A_23_P148194 | 4.03            | 0.0320             | 3.51            | 0.0818             | 4.43             | 0.0212              | ADI1        | acireductone dioxygenase 1                              | NM_018269       | Hs.502773  |
| A_23_P46627  | 4.28            | 0.0380             | 4.34            | 0.0430             | 4.62             | 0.0293              | ADIPOR1     | adiponectin receptor 1                                  | NM_015999       | Hs.5298    |
| A_24_P549518 | 3.17            | 0.0476             | 2.94            | 0.0872             | 3.35             | 0.0436              | AHCYP3      |                                                         | XR_018505       |            |
| A_23_P88963  | 5.01            | 0.0020             | 4.40            | 0.0060             | 3.83             | 0.0197              | ALDOA       | aldolase A, fructose-bisphosphate                       | NM_000034       | Hs.513490  |
| A_24_P740942 | 5.93            | 0.0003             | 4.79            | 0.0021             | 5.52             | 0.0005              | ALDOAP2     | aldolase A, fructose-bisphosphate pseudogene 2          | M21191          | Hs.652473  |
| A_24_P381962 | 3.69            | 0.0034             | 4.46            | 0.0004             | 4.12             | 0.0010              | AP1G1       | adaptor-related protein complex 1, gamma 1 subunit      | NM_001030007    | Hs.461253  |
| A_23_P380857 | 6.66            | 0.0000             | 6.89            | 0.0000             | 6.35             | 0.0000              | APOL4       | apolipoprotein L, 4                                     | NM_030643       | Hs.115099  |
| A_23_P70509  | 2.30            | 0.0457             | 2.67            | 0.0220             | 2.29             | 0.0584              | ATAT1       | alpha tubulin acetyltransferase 1                       | NM_024909       | Hs.654798  |
| A_24_P276932 | 7.26            | 0.0042             | 5.33            | 0.0424             | 5.61             | 0.0314              | ATP6V1C2    | ATPase, H+ transporting, lysosomal 42kDa, V1 subunit C2 | NM_001039362    | Hs.580464  |
| A_23_P154643 | 2.62            | 0.0674             | 2.63            | 0.0835             | 2.69             | 0.0769              | BMP7        | bone morphogenetic protein 7                            | NM_001719       | Hs.473163  |
| A_24_P76868  | 5.95            | 0.0000             | 7.06            | 0.0000             | 7.08             | 0.0000              | BMS1P20     |                                                         | X01147          | Hs.654512  |
| A_23_P39465  | 5.17            | 0.0250             | 4.58            | 0.0609             | 4.67             | 0.0568              | BST2        | bone marrow stromal cell antigen 2                      | NM_004335       | Hs.118110  |
| A_23_P67288  | 3.18            | 0.0016             | 2.91            | 0.0033             | 2.93             | 0.0033              | CALR        | calreticulin                                            | NM_004343       | Hs.515162  |



|              |      |        |      |        |      |        |             |                                                                               |                 |           |
|--------------|------|--------|------|--------|------|--------|-------------|-------------------------------------------------------------------------------|-----------------|-----------|
| A_23_P17269  | 4,74 | 0,0005 | 7,81 | 0,0000 | 5,18 | 0,0001 | CCDC88A     | coiled-coil domain containing 88A                                             | NM_018084       | Hs.292925 |
| A_23_P379945 | 2,71 | 0,0229 | 3,23 | 0,0068 | 3,32 | 0,0056 | CCDC88C     | coiled-coil domain containing 88C                                             | NM_001080414    | Hs.525536 |
| A_23_P132454 | 3,03 | 0,0686 | 4,03 | 0,0153 | 3,51 | 0,0400 | CCNL1       | cyclin L1                                                                     | NM_020307       | Hs.4859   |
| A_24_P337058 |      |        | 2,96 | 0,0923 |      |        | CCNL1       | cyclin L1                                                                     | NM_020307       | Hs.4859   |
| A_23_P48088  | 6,62 | 0,0002 | 6,34 | 0,0002 | 6,27 | 0,0002 | CD27        | CD27 molecule                                                                 | NM_001242       | Hs.355307 |
| A_32_P309929 | 4,97 | 0,0229 | 3,95 | 0,0983 | 5,27 | 0,0182 | CDK9        | cyclin-dependent kinase 9                                                     | ENST0000037326  | Hs.150423 |
| A_23_P204696 | 2,78 | 0,0959 | 3,60 | 0,0305 | 3,72 | 0,0248 | CDKN1B      | cyclin-dependent kinase inhibitor 1B (p27, Kip1)                              | NM_004064       | Hs.238990 |
| A_24_P24332  | 4,76 | 0,0013 | 5,95 | 0,0001 | 5,03 | 0,0006 | CDV3P1      |                                                                               |                 |           |
| A_23_P110504 | 4,60 | 0,0000 | 5,04 | 0,0000 | 5,05 | 0,0000 | CLPTM1L     | CLPTM1-like                                                                   | NM_030782       | Hs.444673 |
| A_23_P81690  | 7,20 | 0,0007 | 6,47 | 0,0017 | 5,09 | 0,0162 | COX7A2      | cytochrome c oxidase subunit VIIa polypeptide 2 (liver)                       | NM_001865       | Hs.70312  |
| A_24_P177634 | 6,84 | 0,0013 | 6,37 | 0,0022 | 4,81 | 0,0255 | COX7A2P2    |                                                                               |                 |           |
| A_23_P41286  | 3,13 | 0,0461 | 3,00 | 0,0708 | 3,84 | 0,0152 | CTBP1       | C-terminal binding protein 1                                                  | NM_001012614    | Hs.208597 |
| A_23_P29495  | 3,14 | 0,0002 | 3,48 | 0,0000 | 3,20 | 0,0001 | CTNNB1      | catenin (cadherin-associated protein), beta 1, 88kDa                          | NM_001904       | Hs.476018 |
| A_23_P14774  | 3,37 | 0,0330 | 3,77 | 0,0191 | 4,62 | 0,0035 | CTSH        | cathepsin H                                                                   | NM_004390       | Hs.148641 |
| A_23_P106056 | 7,64 | 0,0049 | 5,41 | 0,0588 | 5,63 | 0,0480 | DAD1        | defender against cell death 1                                                 | NM_001344       | Hs.82890  |
| A_24_P47870  | 7,34 | 0,0071 | 5,18 | 0,0769 | 5,22 | 0,0770 | DAD1        | defender against cell death 1                                                 | NM_001344       | Hs.82890  |
| A_24_P56462  | 8,05 | 0,0124 |      |        |      |        | DAD1        | defender against cell death 1                                                 | NM_001344       | Hs.82890  |
| A_23_P149099 | 4,46 | 0,0001 | 3,85 | 0,0003 | 3,36 | 0,0015 | DDOST       | dolichyl-diphosphooligosaccharide--protein glycosyltransferase subunit (non-  | NM_005216       | Hs.523145 |
| A_23_P36962  | 4,89 | 0,0459 | 4,66 | 0,0738 | 5,39 | 0,0323 | DNAJC3      | DnaJ (Hsp40) homolog, subfamily C, member 3"                                  | NM_006260       | Hs.656476 |
| A_23_P60376  | 6,45 | 0,0006 | 4,79 | 0,0095 | 4,16 | 0,0277 | EDF1        | endothelial differentiation-related factor 1                                  | NM_153200       | Hs.174050 |
| A_24_P821168 | 4,25 | 0,0103 | 4,59 | 0,0058 | 4,29 | 0,0109 | EEF1DP1     | eukaryotic translation elongation factor 1 delta (guanine nucleotide exchange | NM_032378       | Hs.333388 |
| A_24_P307002 | 3,25 | 0,0316 | 3,66 | 0,0171 | 3,30 | 0,0358 | EEF1DP5     | eukaryotic translation elongation factor 1 delta (guanine nucleotide exchange | NM_032378       | Hs.333388 |
| A_24_P477475 | 1,99 | 0,0098 | 1,79 | 0,0235 | 1,67 | 0,0373 | EEF1GP8     |                                                                               | XR_018231       |           |
| A_24_P87763  | 4,11 | 0,0054 | 4,45 | 0,0024 | 4,39 | 0,0030 | EEF2        | eukaryotic translation elongation factor 2                                    | NM_001961       | Hs.515070 |
| A_24_P169593 | 3,37 | 0,0026 | 2,58 | 0,0225 | 2,68 | 0,0178 | EIF2S2P3    |                                                                               |                 |           |
| A_24_P206427 | 4,40 | 0,0056 | 4,33 | 0,0063 | 3,39 | 0,0408 | EIF3E       | eukaryotic translation initiation factor 3, subunit E"                        | NM_001568       | Hs.405590 |
| A_23_P41645  | 5,74 | 0,0001 | 5,24 | 0,0002 | 5,47 | 0,0001 | ELL2        | elongation factor, RNA polymerase II, 2"                                      | NM_012081       | Hs.192221 |
| A_23_P139929 | 4,72 | 0,0053 | 3,55 | 0,0442 | 4,31 | 0,0119 | ERP29       | endoplasmic reticulum protein 29                                              | NM_006817       | Hs.75841  |
| A_24_P204135 | 2,27 | 0,0359 | 2,86 | 0,0084 | 2,56 | 0,0202 | FAHD2P1     |                                                                               | XR_016023       |           |
| A_23_P137751 | 4,71 | 0,0022 | 5,40 | 0,0004 | 4,78 | 0,0016 | FAM46C      | family with sequence similarity 46, member C                                  | NM_017709       | Hs.356216 |
| A_24_P67268  | 2,32 | 0,0376 | 2,51 | 0,0283 | 2,25 | 0,0558 | FDPSP4      |                                                                               | XR_018717       |           |
| A_23_P161596 | 3,82 | 0,0505 | 4,31 | 0,0302 | 3,51 | 0,0991 | FKBP2       | FK506 binding protein 2, 13kDa"                                               | NM_004470       | Hs.227729 |
| A_24_P223124 | 3,53 | 0,0768 | 4,39 | 0,0290 | 4,36 | 0,0311 | FNDC3B      | fibronectin type III domain containing 3B                                     | NM_022763       | Hs.159430 |
| A_23_P50498  | 5,44 | 0,0039 | 5,53 | 0,0030 | 5,00 | 0,0080 | FTL         | ferritin, light polypeptide"                                                  | NM_000146       | Hs.433670 |
| A_23_P50504  | 2,03 | 0,0144 | 2,37 | 0,0041 | 2,12 | 0,0119 | FTL         | ferritin, light polypeptide                                                   | NM_000146       | Hs.433670 |
| A_32_P155247 | 3,50 | 0,0280 | 4,00 | 0,0135 | 2,94 | 0,0935 | FTL         | ferritin, light polypeptide                                                   | NM_000146       | Hs.433670 |
| A_24_P307306 | 7,08 | 0,0010 | 4,38 | 0,0473 | 4,39 | 0,0485 | GAPDHP33    |                                                                               | ENST0000044316  | Hs.641178 |
| A_24_P273666 | 2,16 | 0,0098 | 1,59 | 0,0769 | 1,59 | 0,0798 | GNAS        | GNAS complex locus                                                            | NM_001077489    | Hs.125898 |
| A_23_P320478 | 4,81 | 0,0405 | 4,40 | 0,0805 | 6,01 | 0,0111 | GOLGA2P10   | hypothetical protein FLJ22795                                                 | BC065260        | Hs.546614 |
| A_23_P3193   | 3,19 | 0,0428 | 3,20 | 0,0521 | 3,91 | 0,0143 | GOLGA5      | golgin A5                                                                     | NM_005113       | Hs.104320 |
| A_23_P156017 | 4,97 | 0,0127 | 4,89 | 0,0156 | 4,13 | 0,0486 | GOLPH3      | golgi phosphoprotein 3 (coat-protein)                                         | NM_022130       | Hs.408909 |
| A_24_P495367 | 2,62 | 0,0034 | 3,00 | 0,0006 | 2,36 | 0,0080 | GRXCR1      | glutaredoxin, cysteine rich 1                                                 | NM_001080476    | Hs.162559 |
| A_24_P928604 | 5,15 | 0,0049 | 4,36 | 0,0193 | 4,52 | 0,0151 | hCG_1641703 | hCG1641703                                                                    | ENST00000401937 |           |
| A_32_P55934  | 1,45 | 0,0084 | 1,07 | 0,0686 | 1,03 | 0,0837 | hCG_21078   | hCG21078                                                                      | CD385156        | Hs.708099 |
| A_23_P2582   | 3,58 | 0,0019 | 3,78 | 0,0009 | 2,97 | 0,0099 | HDAC7       | histone deacetylase 7                                                         | NM_015401       | Hs.200063 |
| A_23_P428184 | 3,73 | 0,0269 | 4,74 | 0,0049 | 3,26 | 0,0735 | HIST1H2AD   | histone cluster 1, H2ad                                                       | NM_021065       | Hs.679229 |
| A_24_P86389  | 5,05 | 0,0190 | 4,97 | 0,0245 | 4,29 | 0,0615 | HIST1H2AM   | histone cluster 1, H2am                                                       | NM_003514       | Hs.134999 |
| A_23_P93180  | 3,20 | 0,0297 | 4,50 | 0,0021 | 3,24 | 0,0338 | HIST1H2BC   | histone cluster 1, H2bc                                                       | NM_003526       | Hs.658713 |
| A_24_P146211 | 3,22 | 0,0402 | 4,29 | 0,0060 | 3,88 | 0,0146 | HIST1H2BD   | histone cluster 1, H2bd                                                       | NM_021063       | Hs.591797 |
| A_32_P152348 | 3,16 | 0,0043 | 4,06 | 0,0002 | 3,72 | 0,0008 | HIST1H2BD   | histone cluster 1, H2bd                                                       | BQ683489        | Hs.591797 |
| A_23_P40470  | 2,92 | 0,0774 | 3,97 | 0,0157 | 3,38 | 0,0464 | HIST1H2BE   | histone cluster 1, H2be"                                                      | NM_003523       | Hs.534369 |
| A_23_P167997 | 2,99 | 0,0457 | 4,11 | 0,0056 | 3,48 | 0,0222 | HIST1H2BG   | histone cluster 1, H2bg                                                       | NM_003518       | Hs.591809 |
| A_23_P111041 | 3,72 | 0,0392 | 4,20 | 0,0222 | 4,03 | 0,0296 | HIST1H2BI   | histone cluster 1, H2bi                                                       | NM_003525       | Hs.553506 |
| A_24_P55148  | 3,85 | 0,0152 | 5,03 | 0,0014 | 3,95 | 0,0146 | HIST1H2BJ   | histone cluster 1, H2bj                                                       | NM_021058       | Hs.656567 |
| A_24_P3783   | 3,99 | 0,0166 | 4,48 | 0,0075 | 4,29 | 0,0110 | HIST1H2BM   | histone cluster 1, H2bm                                                       | NM_003521       | Hs.182432 |
| A_23_P402081 | 2,40 | 0,0815 | 3,18 | 0,0210 | 2,57 | 0,0782 | HIST1H2BN   | histone cluster 1, H2bn"                                                      | NM_003520       | Hs.673851 |
| A_24_P544661 | 3,44 | 0,0035 | 4,35 | 0,0002 | 3,67 | 0,0017 | HIST2H2BC   |                                                                               | BC068044        | Hs.595570 |
| A_24_P156911 | 3,03 | 0,0218 | 4,12 | 0,0938 | 3,08 | 0,0230 | HIST2H2BE   | histone cluster 2, H2be                                                       | NM_003528       | Hs.2178   |
| A_24_P156911 |      |        | 3,70 | 0,0050 |      |        | HIST2H2BE   | histone cluster 2, H2be                                                       | NM_003528       | Hs.2178   |

|              |      |        |      |        |      |        |              |                                                                     |                 |           |
|--------------|------|--------|------|--------|------|--------|--------------|---------------------------------------------------------------------|-----------------|-----------|
| A 23 P332992 | 2,49 | 0,0273 | 3,50 | 0,0018 | 3,09 | 0,0067 | HIST3H2BB    | histone cluster 3, H2bb                                             | NM_175055       | Hs.376691 |
| A 24 P524452 | 2,42 | 0,0785 | 3,52 | 0,0093 | 2,63 | 0,0690 | HIST3H2BB    | histone cluster 3, H2bb                                             | DB010344        | Hs.376691 |
| A 23 P408353 | 3,89 | 0,0063 | 3,67 | 0,0105 | 3,09 | 0,0375 | HLA-A        | major histocompatibility complex, class I, A                        | NM_002116       | Hs.181244 |
| A 24 P912382 | 3,14 | 0,0063 | 2,89 | 0,0131 | 2,58 | 0,0297 | HLA-A        |                                                                     | ENST0000037680  | Hs.181244 |
| A 24 P418044 | 2,24 | 0,0077 | 2,07 | 0,0149 | 1,81 | 0,0381 | HLA-J        | major histocompatibility complex, class I, J (pseudogene)           | NR_024240       | Hs.181244 |
| A 23 P396867 | 5,05 | 0,0690 | 6,16 | 0,0286 |      |        | HM13         | histocompatibility (minor) 13                                       | NM_178582       | Hs.373741 |
| A 23 P40347  | 5,71 | 0,0000 | 6,56 | 0,0000 | 5,03 | 0,0002 | HM13         | histocompatibility (minor) 13                                       | NM_178580       | Hs.373741 |
| A 24 P320254 |      |        | 2,01 | 0,0220 | 1,75 | 0,0531 | HNRNPH1      | heterogeneous nuclear ribonucleoprotein H1 (H)                      | NM_005520       | Hs.604001 |
| A 32 P34149  | 1,59 | 0,0475 | 2,27 | 0,0041 | 1,96 | 0,0151 | HNRNPH1      | heterogeneous nuclear ribonucleoprotein H1 (H)                      | NM_005520       | Hs.604001 |
| A 23 P2601   | 4,98 | 0,0221 | 4,30 | 0,0615 |      |        | HSP90B1      | heat shock protein 90kDa beta (Grp94), member 1                     | NM_003299       | Hs.192374 |
| A 24 P150361 | 3,97 | 0,0020 | 3,28 | 0,0101 | 3,72 | 0,0033 | HSP90B1      | heat shock protein 90kDa beta (Grp94), member 1*                    | NM_003299       | Hs.192374 |
| A 24 P18190  | 5,38 | 0,0005 | 6,39 | 0,0000 | 5,15 | 0,0007 | HSPA5        | heat shock 70kDa protein 5 (glucose-regulated protein, 78kDa)*      | NM_005347       | Hs.716396 |
| A 23 P87545  | 2,44 | 0,0355 | 2,63 | 0,0272 | 2,68 | 0,0237 | IFITM3       | interferon induced transmembrane protein 3                          | NM_021034       | Hs.374650 |
| A 23 P65442  | 3,38 | 0,0348 | 3,95 | 0,0147 | 4,51 | 0,0050 | IRF9         | interferon regulatory factor 9                                      | NM_006084       | Hs.1706   |
| A 24 P379820 | 6,69 | 0,0001 | 4,95 | 0,0024 | 6,73 | 0,0001 | ITM2C        | integral membrane protein 2C                                        | NM_030926       | Hs.111577 |
| A 23 P146431 | 5,80 | 0,0000 | 6,02 | 0,0000 | 6,12 | 0,0000 | KIAA0368     | KIAA0368                                                            | BC021127        | Hs.368255 |
| A 23 P149249 | 2,69 | 0,0273 | 2,33 | 0,0763 | 2,73 | 0,0304 | KRTCAP2      | keratinocyte associated protein 2                                   | NM_173852       | Hs.516671 |
| A 24 P40055  | 2,93 | 0,0337 | 3,05 | 0,0314 | 3,76 | 0,0066 | LENG8        | leukocyte receptor cluster (LRC) member 8                           | NM_052925       | Hs.714385 |
| A 24 P273143 | 7,00 | 0,0030 | 6,16 | 0,0085 | 5,21 | 0,0302 | LINC00152    | long intergenic non-protein coding RNA 152                          | NR_024204       | Hs.652166 |
| A 23 P9591   | 6,65 | 0,0001 | 5,76 | 0,0003 | 5,54 | 0,0005 | LMAN2        | lectin, mannose-binding 2*                                          | NM_006816       | Hs.75864  |
| A 24 P9285   | 6,19 | 0,0010 | 5,28 | 0,0041 | 5,24 | 0,0049 | LMAN2        | lectin, mannose-binding 2                                           | NM_006816       | Hs.75864  |
| A 24 P350008 | 3,19 | 0,0257 | 2,78 | 0,0683 | 2,88 | 0,0584 | LOC100129553 | hypothetical LOC100129553                                           | ENST00000442083 |           |
| A 24 P221615 | 3,44 | 0,0012 | 5,69 | 0,0000 | 5,35 | 0,0000 | LOC100129631 | hypothetical protein LOC100129631                                   |                 |           |
| A 32 P793319 | 2,68 | 0,0059 | 3,58 | 0,0002 | 3,44 | 0,0004 | LOC100131744 | hypothetical protein LOC100131744                                   | AK098749        | Hs.652768 |
| A 24 P203418 | 3,47 | 0,0001 | 5,02 | 0,0000 | 5,10 | 0,0000 | LOC100131845 | similar to hCG1742309                                               | ENST0000061737  | Hs.547094 |
| A 23 P326987 | 3,26 | 0,0703 | 3,99 | 0,0285 | 4,26 | 0,0186 | LOC100190939 | hypothetical LOC100190939                                           | AF318337        |           |
| A 24 P401090 | 4,47 | 0,0005 | 5,49 | 0,0000 | 4,40 | 0,0005 | LOC400750    | hypothetical gene supported by AF216292; NM_005347                  | ENST00000442006 |           |
| A 23 P63953  | 2,19 | 0,0066 | 1,75 | 0,0362 | 1,84 | 0,0269 | LOC646119    | similar to hCG2040247                                               | XM_929084       |           |
| A 24 P187197 | 4,13 | 0,0174 | 4,11 | 0,0210 | 5,09 | 0,0035 | LOC652005    | similar to melanoma-associated chondroitin sulfate proteoglycan 4   | BX648930        | Hs.639860 |
| A 24 P627503 | 1,85 | 0,0113 | 3,57 | 0,0000 | 2,96 | 0,0001 | LOC652494    | similar to Ig heavy chain V-III region VH26 precursor               | ENST0000060366  | Hs.510635 |
| A 24 P889462 | 2,39 | 0,0001 | 2,76 | 0,0000 | 2,95 | 0,0000 | LOC652494    | similar to Ig heavy chain V-III region VH26 precursor               | L38427          | Hs.510635 |
| A 24 P256037 | 3,16 | 0,0060 | 2,45 | 0,0406 | 2,62 | 0,0268 | LOC654170    | similar to hCG1643342                                               | ENST00000479473 |           |
| A 24 P861442 | 5,35 | 0,0059 | 4,49 | 0,0237 | 4,75 | 0,0163 | LOC728428    | hypothetical LOC728428                                              | XR_015830       | Hs.647679 |
| A 24 P409661 | 6,77 | 0,0005 | 4,96 | 0,0088 | 5,71 | 0,0025 | LOC729768    | hypothetical LOC729768                                              | ENST00000448345 |           |
| A 23 P132793 | 5,43 | 0,0000 | 4,74 | 0,0001 | 3,64 | 0,0032 | MANF         | mesencephalic astrocyte-derived neurotrophic factor                 | NM_006010       | Hs.436446 |
| A 24 P336754 | 3,69 | 0,0348 | 4,97 | 0,0041 | 4,79 | 0,0063 | MCL1         | myeloid cell leukemia sequence 1 (BCL2-related)                     | NM_021960       | Hs.713518 |
| A 24 P336759 |      |        | 4,13 | 0,0305 | 3,42 | 0,0926 | MCL1         | myeloid cell leukemia 1                                             | NM_021960       | Hs.713518 |
| A 23 P415021 | 4,48 | 0,0719 |      |        |      |        | METTL7A      | methyltransferase like 7A                                           | NM_014033       | Hs.716437 |
| A 24 P941773 | 4,77 | 0,0117 | 3,91 | 0,0484 | 3,64 | 0,0752 | METTL7A      | methyltransferase like 7A                                           | NM_014033       | Hs.716437 |
| A 24 P6921   | 7,19 | 0,0026 | 6,23 | 0,0086 | 5,33 | 0,0282 | MIR4435-1HG  | hypothetical LOC541471                                              | ENST0000030860  | Hs.560805 |
| A 23 P84596  | 7,03 | 0,0000 | 7,64 | 0,0000 | 6,79 | 0,0000 | MZB1         | marginal zone B and B1 cell-specific protein                        | NM_016459       | Hs.409563 |
| A 23 P152804 | 6,19 | 0,0045 | 4,15 | 0,0733 | 4,05 | 0,0866 | NME1         | NME/NM23 nucleoside diphosphate kinase 1                            | NM_198175       | Hs.463456 |
| A 23 P398005 | 5,08 | 0,0716 |      |        |      |        | NME2P1       | non-metastatic cells 2, protein (NM23B) expressed in, pseudogene 1* | NR_001577       |           |
| A 32 P39324  | 5,49 | 0,0035 | 4,29 | 0,0245 | 3,91 | 0,0449 | NME2P1       |                                                                     | CB993898        | Hs.577804 |
| A 24 P16340  | 3,25 | 0,0050 | 2,70 | 0,0222 | 2,36 | 0,0523 | NP1207855    | similar to acidic ribosomal phosphoprotein P0                       | ENST0000044811  | Hs.647767 |
| A 24 P335263 | 4,48 | 0,0034 | 5,37 | 0,0004 | 3,64 | 0,0186 | NUDT4        | nudix (nucleoside diphosphate linked moiety X)-type motif 4         | NM_199040       | Hs.506325 |
| A 24 P50753  | 4,40 | 0,0037 | 5,33 | 0,0004 | 3,30 | 0,0343 | NUDT4        | nudix (nucleoside diphosphate linked moiety X)-type motif 4         | NM_199040       | Hs.506325 |
| A 23 P129829 | 3,54 | 0,0043 | 3,24 | 0,0089 | 3,84 | 0,0019 | ORMDL3       | ORMDL sphingolipid biosynthesis regulator 3                         | NM_139280       | Hs.514151 |
| A 23 P107412 | 7,06 | 0,0000 | 7,32 | 0,0000 | 6,39 | 0,0000 | P4HB         | prolyl 4-hydroxylase, beta polypeptide                              | NM_000918       | Hs.464336 |
| A 24 P213684 | 7,00 | 0,0007 | 5,67 | 0,0048 | 6,66 | 0,0010 | P4HB         | prolyl 4-hydroxylase, beta polypeptide*                             | AB062434        | Hs.464336 |
| A 23 P51718  | 2,59 | 0,0638 | 3,13 | 0,0274 | 2,66 | 0,0735 | PABPC4       | poly(A) binding protein, cytoplasmic 4 (inducible form)*            | NM_003819       | Hs.169900 |
| A 23 P210001 | 2,41 | 0,0627 | 3,55 | 0,0052 | 3,20 | 0,0136 | PAX8         | paired box 8                                                        | NM_003466       | Hs.469728 |
| A 23 P42802  | 6,48 | 0,0065 | 5,40 | 0,0280 | 5,97 | 0,0139 | PDIA4        | protein disulfide isomerase family A, member 4                      | NM_004911       | Hs.93659  |
| A 23 P167040 | 5,03 | 0,0235 | 4,34 | 0,0669 | 4,82 | 0,0376 | PDIA5        | protein disulfide isomerase family A, member 5                      | NM_006810       | Hs.477352 |
| A 23 P13604  | 6,48 | 0,0016 | 5,35 | 0,0086 | 5,27 | 0,0101 | PEBP1        | phosphatidylethanolamine binding protein 1                          | NM_002567       | Hs.713526 |
| A 23 P345118 | 6,01 | 0,0001 | 7,31 | 0,0000 | 6,72 | 0,0000 | PIM1         | Pim-1 proto-oncogene, serine/threonine kinase                       | NM_002648       | Hs.81170  |
| A 24 P379104 | 4,37 | 0,0000 | 4,88 | 0,0000 | 4,94 | 0,0000 | PIM2         | Pim-2 proto-oncogene, serine/threonine kinase                       | NM_006875       | Hs.716596 |
| A 23 P312920 | 4,80 | 0,0244 | 3,94 | 0,0891 | 4,90 | 0,0256 | POU2AF1      | POU class 2 associating factor 1                                    | NM_006235       | Hs.654525 |
| A 24 P304723 | 7,32 | 0,0000 | 6,59 | 0,0000 | 6,05 | 0,0002 | PPIB         | peptidylprolyl isomerase B (cyclophilin B)                          | NM_000942       | Hs.434937 |

|              |      |        |      |        |      |        |           |                                                                                |                 |           |
|--------------|------|--------|------|--------|------|--------|-----------|--------------------------------------------------------------------------------|-----------------|-----------|
| A_23_P91114  | 5.80 | 0.0026 | 6.56 | 0.0005 | 3.59 | 0.0820 | PREB      | prolactin regulatory element binding                                           | NM_013388       | Hs.279784 |
| A_32_P364462 | 1.68 | 0.0907 | 2.08 | 0.0369 | 2.02 | 0.0457 | RASIP1    | Ras interacting protein 1                                                      | NM_017805       | Hs.233955 |
| A_32_P131377 | 5.53 | 0.0580 | 5.34 | 0.0855 | 5.23 | 0.0987 | REEP5     | receptor accessory protein 5                                                   | NM_005669       | Hs.429608 |
| A_23_P97141  | 3.52 | 0.0650 | 7.63 | 0.0001 | 4.93 | 0.0093 | RGS1      | regulator of G-protein signaling 1                                             | NM_002922       | Hs.75256  |
| A_24_P375237 | 3.60 | 0.0031 | 3.22 | 0.0080 | 2.61 | 0.0375 | RPL12     | ribosomal protein L12                                                          | NM_000976       | Hs.408054 |
| A_24_P332471 | 2.72 | 0.0001 | 2.67 | 0.0001 | 2.23 | 0.0012 | RPL12P18  | similar to ribosomal protein L12                                               | ENST00000437174 | Hs.646786 |
| A_24_P40757  | 4.25 | 0.0080 | 3.92 | 0.0160 | 2.95 | 0.0935 | RPL12P8   |                                                                                | XM_928198       |           |
| A_24_P142223 | 4.48 | 0.0046 | 4.42 | 0.0049 | 4.23 | 0.0076 | RPL13     | ribosomal protein L13                                                          | NM_033251       | Hs.410817 |
| A_24_P142228 | 4.47 | 0.0105 | 4.37 | 0.0140 | 4.21 | 0.0189 | RPL13     | ribosomal protein L13                                                          | NM_033251       | Hs.410817 |
| A_23_P90143  | 1.01 | 0.0638 |      |        |      |        | RPL13A    | ribosomal protein L13a                                                         | NM_012423       | Hs.523185 |
| A_24_P272061 | 1.97 | 0.0567 | 2.04 | 0.0595 |      |        | RPL13A    | ribosomal protein L13a                                                         | NM_012423       | Hs.523185 |
| A_32_P92295  | 3.46 | 0.0367 | 3.07 | 0.0854 | 3.22 | 0.0693 | RPL13A    | ribosomal protein L13a                                                         | NM_012423       | Hs.523185 |
| A_24_P289884 | 2.97 | 0.0192 | 3.34 | 0.0089 | 3.19 | 0.0134 | RPL13P    |                                                                                |                 |           |
| A_24_P238426 | 4.88 | 0.0055 | 4.77 | 0.0066 | 4.52 | 0.0109 | RPL13P6   |                                                                                |                 |           |
| A_24_P238427 | 3.24 | 0.0047 | 3.04 | 0.0081 | 2.94 | 0.0108 | RPL13P6   |                                                                                |                 |           |
| A_32_P193288 | 5.20 | 0.0014 | 4.28 | 0.0078 | 4.36 | 0.0068 | RPL18A    | ribosomal protein L18a                                                         | NM_000980       | Hs.337766 |
| A_24_P178654 | 4.69 | 0.0003 | 3.95 | 0.0015 | 3.84 | 0.0022 | RPL18AP15 | similar to mCG14783                                                            | ENST00000430258 |           |
| A_23_P90383  | 3.86 | 0.0070 | 3.17 | 0.0315 | 3.40 | 0.0202 | RPL18AP3  | ribosomal protein L18a                                                         | NM_000980       | Hs.337766 |
| A_24_P366768 | 5.35 | 0.0003 | 4.78 | 0.0009 | 4.49 | 0.0019 | RPL18AP8  |                                                                                | XR_018308       |           |
| A_23_P256933 | 2.15 | 0.0539 |      |        |      |        | RPL24     | ribosomal protein L24                                                          | NM_000986       | Hs.477028 |
| A_32_P100974 | 4.58 | 0.0108 | 4.10 | 0.0272 | 3.85 | 0.0408 | RPL24     | ribosomal protein L24                                                          | NM_000986       | Hs.477028 |
| A_23_P203577 | 3.31 | 0.0004 | 2.81 | 0.0020 | 2.71 | 0.0031 | RPL27A    | ribosomal protein L27a                                                         | NM_000990       | Hs.523463 |
| A_23_P68942  | 3.85 | 0.0004 | 3.69 | 0.0005 | 4.05 | 0.0002 | RPL3      | ribosomal protein L3                                                           | NM_000967       | Hs.119598 |
| A_23_P112429 | 2.31 | 0.0240 | 4.07 | 0.0017 | 4.53 | 0.0006 | RPL35     | ribosomal protein L35                                                          | NM_007209       | Hs.182825 |
| A_24_P403403 | 2.27 | 0.0186 |      |        |      |        | RPL35     | ribosomal protein L35                                                          | NM_007209       | Hs.182825 |
| A_32_P72940  | 5.31 | 0.0001 |      |        |      |        | RPL35     | ribosomal protein L35                                                          | NM_007209       | Hs.182825 |
| A_24_P367063 | 2.10 | 0.0018 | 2.04 | 0.0021 | 2.37 | 0.0004 | RPL3P12   |                                                                                |                 |           |
| A_24_P280933 | 2.43 | 0.0005 | 2.45 | 0.0003 | 2.80 | 0.0001 | RPL3P3    |                                                                                | XR_018187       |           |
| A_23_P31654  | 4.31 | 0.0025 | 3.98 | 0.0046 | 3.69 | 0.0093 | RPL8      | ribosomal protein L8                                                           | NM_000973       | Hs.178551 |
| A_23_P204472 | 4.48 | 0.0000 | 3.46 | 0.0009 | 3.38 | 0.0010 | RPLP0     | ribosomal protein, large, P0                                                   | NM_053275       | Hs.546285 |
| A_32_P116881 | 4.36 | 0.0002 | 3.49 | 0.0021 | 3.03 | 0.0082 | RPLP0     | ribosomal protein, large, P0"                                                  | NM_053275       | Hs.546285 |
| A_24_P358010 | 3.63 | 0.0005 | 3.29 | 0.0010 | 3.03 | 0.0026 | RPLP1P6   |                                                                                | BG213931        | Hs.637971 |
| A_23_P209152 | 2.88 | 0.0258 |      |        |      |        | RPS15     | ribosomal protein S15                                                          | NM_001018       | Hs.406683 |
| A_24_P225010 | 4.53 | 0.0047 | 3.47 | 0.0353 | 3.70 | 0.0237 | RPS15     | ribosomal protein S15                                                          | NM_001018       | Hs.406683 |
| A_23_P208850 | 3.15 | 0.0060 | 2.54 | 0.0314 | 2.33 | 0.0541 | RPS16     | ribosomal protein S16                                                          | NM_001020       | Hs.397609 |
| A_23_P142475 | 6.52 | 0.0117 | 6.16 | 0.0196 | 5.40 | 0.0465 | RPS28     | ribosomal protein S28                                                          | NM_001031       | Hs.322473 |
| A_23_P157196 | 1.97 | 0.0142 | 1.62 | 0.0564 | 1.64 | 0.0521 | RPS2P32   | ribosomal protein S2 pseudogene 32                                             | NR_026676       | Hs.367935 |
| A_24_P92744  | 2.11 | 0.0304 | 1.94 | 0.0586 | 1.93 | 0.0636 | RPS2P52   |                                                                                |                 |           |
| A_24_P50707  | 1.59 | 0.0369 | 1.61 | 0.0419 | 1.41 | 0.0921 | RPS4XP19  |                                                                                | XR_019448       |           |
| A_24_P477051 | 1.91 | 0.0138 | 1.56 | 0.0567 | 1.56 | 0.0598 | RPS4XP21  | similar to 40S ribosomal protein S4, X isoform                                 | ENST00000603814 | Hs.646361 |
| A_23_P46182  | 3.94 | 0.0008 | 2.95 | 0.0107 | 2.75 | 0.0192 | RPS8      | ribosomal protein S8                                                           | NM_001012       | Hs.512675 |
| A_32_P179295 | 4.48 | 0.0626 |      |        |      |        | RPS9      | ribosomal protein S9                                                           | BC020462        | Hs.467284 |
| A_32_P22078  | 4.45 | 0.0148 | 4.06 | 0.0310 | 3.68 | 0.0583 | RPS9      | ribosomal protein S9                                                           | NM_001013       | Hs.546288 |
| A_32_P223456 | 5.02 | 0.0357 | 4.19 | 0.0167 | 4.49 | 0.0826 | RPS9      | ribosomal protein S9                                                           | BC020462        | Hs.467284 |
| A_23_P120566 | 5.04 | 0.0037 |      |        | 5.66 | 0.0011 | RRBP1     | ribosome binding protein 1                                                     | NM_001042576    | Hs.472213 |
| A_23_P6344   | 4.33 | 0.0115 | 3.76 | 0.0334 | 3.68 | 0.0400 | SDF2L1    | stromal cell-derived factor 2-like 1                                           | NM_022044       | Hs.303116 |
| A_23_P208009 | 8.26 | 0.0000 | 8.13 | 0.0000 | 7.73 | 0.0000 | SEC11C    | SEC11 homolog C (S. cerevisiae)                                                | NM_033280       | Hs.45107  |
| A_23_P206960 | 3.44 | 0.0955 |      |        | 4.24 | 0.0425 | SEC14L1   | SEC14-like 1 (S. cerevisiae)                                                   | NM_003003       | Hs.464184 |
| A_24_P237766 | 6.07 | 0.0029 | 6.38 | 0.0014 | 5.43 | 0.0074 | SEC14L1   | SEC14-like 1 (S. cerevisiae)                                                   | AK130317        | Hs.464184 |
| A_23_P412392 | 4.41 | 0.0099 | 4.04 | 0.0210 | 4.68 | 0.0066 | SEC22B    | SEC22 vesicle trafficking protein homolog B (S. cerevisiae) (gene/pseudogene)  | NM_004892       | Hs.632438 |
| A_23_P212458 | 5.37 | 0.0026 | 5.32 | 0.0024 | 4.10 | 0.0231 | SEC61A1   | Sec61 alpha 1 subunit (S. cerevisiae)                                          | NM_013336       | Hs.518236 |
| A_24_P353638 | 4.66 | 0.0074 | 5.06 | 0.0034 | 5.48 | 0.0017 | SLAMF7    | SLAM family member 7                                                           | NM_021181       | Hs.517265 |
| A_23_P55998  | 4.19 | 0.0423 | 5.20 | 0.0122 | 4.90 | 0.0194 | SLC1A5    | solute carrier family 1 (neutral amino acid transporter), member 5             | NM_005628       | Hs.631582 |
| A_23_P70571  | 7.19 | 0.0000 | 7.27 | 0.0000 | 7.12 | 0.0000 | SLC39A7   | solute carrier family 39 (zinc transporter), member 7                          | NM_006979       | Hs.631995 |
| A_23_P18317  | 4.04 | 0.0000 | 4.72 | 0.0000 | 4.72 | 0.0000 | SLC41A3   | solute carrier family 41, member 3                                             | NM_017836       | Hs.573007 |
| A_23_P216630 | 5.92 | 0.0001 | 4.34 | 0.0033 | 2.82 | 0.0811 | SLC44A1   | solute carrier family 44 (choline transporter), member 1                       | NM_080546       | Hs.573495 |
| A_24_P335620 | 3.92 | 0.0367 | 6.52 | 0.0005 | 5.53 | 0.0032 | SLC7A5    | solute carrier family 7 (amino acid transporter light chain, L system), member | NM_003486       | Hs.513797 |
| A_32_P3600   | 4.96 | 0.0134 | 4.60 | 0.0258 | 4.88 | 0.0173 | SMARCC2   |                                                                                | THC2587763      |           |
| A_23_P42829  | 7.91 | 0.0019 | 6.28 | 0.0136 | 6.97 | 0.0057 | SND1      | staphylococcal nuclease and tudor domain containing 1                          | NM_014390       | Hs.122523 |

|              |      |        |      |        |      |        |          |                                                                             |                |           |
|--------------|------|--------|------|--------|------|--------|----------|-----------------------------------------------------------------------------|----------------|-----------|
| A_23_P118791 | 3,81 | 0,0103 | 7,26 | 0,0000 | 7,34 | 0,0000 | SNORD118 | transmembrane protein 107                                                   | NM_032354      | Hs.513933 |
| A_23_P24594  | 3,99 | 0,0010 | 3,02 | 0,0025 | 2,20 | 0,0354 | SNORD14E | heat shock 70kDa protein 8                                                  | NM_006597      | Hs.702021 |
| A_24_P287129 | 3,43 | 0,0006 | 3,16 | 0,0011 | 2,28 | 0,0220 | SNORD14E | heat shock 70kDa protein 8                                                  | NM_006597      | Hs.702021 |
| A_32_P13728  | 3,85 | 0,0008 | 3,42 | 0,0024 | 2,78 | 0,0162 | SNORD14E | heat shock 70kDa protein 8                                                  | NM_006597      | Hs.702021 |
| A_32_P134634 | 4,08 | 0,0055 | 5,12 | 0,0005 | 5,53 | 0,0002 | SNORD3D  |                                                                             | THC2530077     | Hs.658815 |
| A_23_P29630  | 6,71 | 0,0008 | 5,74 | 0,0033 | 7,35 | 0,0002 | SPCS1    | signal peptidase complex subunit 1 homolog (S. cerevisiae)                  | NM_014041      | Hs.11125  |
| A_23_P86653  | 6,40 | 0,0097 | 5,15 | 0,0468 | 5,16 | 0,0468 | SRGN     | serglycin                                                                   | NM_002727      | Hs.1908   |
| A_23_P80773  | 6,55 | 0,0001 | 6,89 | 0,0000 | 5,19 | 0,0015 | SRPRB    | signal recognition particle receptor, B subunit                             | NM_021203      | Hs.12152  |
| A_23_P126474 | 7,26 | 0,0030 | 6,68 | 0,0056 | 5,55 | 0,0253 | SSR2     | signal sequence receptor, beta (translocon-associated protein beta)*        | NM_003145      | Hs.74564  |
| A_23_P155229 | 6,34 | 0,0070 | 5,27 | 0,0293 | 4,56 | 0,0714 | SSR3     | signal sequence receptor, gamma (translocon-associated protein gamma)       | NM_007107      | Hs.518346 |
| A_24_P319942 | 6,14 | 0,0028 | 6,21 | 0,0021 | 4,65 | 0,0257 | SSR3     | signal sequence receptor, gamma (translocon-associated protein gamma)       | NM_007107      | Hs.518346 |
| A_23_P259172 | 5,77 | 0,0001 | 7,38 | 0,0000 | 6,66 | 0,0000 | SSR4     | signal sequence receptor, delta                                             | NM_006280      | Hs.409223 |
| A_32_P2333   | 5,84 | 0,0007 | 3,87 | 0,0260 | 4,76 | 0,0051 | SUB1P3   | SUB1 homolog (S. cerevisiae)                                                | NM_006713      | Hs.229641 |
| A_32_P11477  | 6,46 | 0,0131 | 5,11 | 0,0651 | 5,10 | 0,0683 | SYVN1    | Finkel-Biskis-Reilly murine sarcoma virus (FBR-MuSV) ubiquitously expressed | NM_001997      | Hs.387208 |
| A_23_P204702 | 3,94 | 0,0672 | 4,35 | 0,0499 | 4,01 | 0,0813 | TMBIM6   | transmembrane BAX inhibitor motif containing 6                              | NM_003217      | Hs.708025 |
| A_23_P70127  | 2,92 | 0,0371 | 2,75 | 0,0636 | 3,02 | 0,0383 | TMED9    | transmembrane emp24 protein transport domain containing 9                   | NM_017510      | Hs.279929 |
| A_23_P111288 | 3,99 | 0,0026 | 2,95 | 0,0285 | 3,48 | 0,0081 | TMEM14C  | transmembrane protein 14C                                                   | NM_016462      | Hs.519557 |
| A_23_P115313 | 2,92 | 0,0458 | 3,28 | 0,0280 | 3,37 | 0,0231 | TOR3A    | torsin family 3, member A                                                   | NM_022371      | Hs.584957 |
| A_23_P168882 | 4,62 | 0,0058 | 3,49 | 0,0457 | 4,48 | 0,0077 | TP53INP1 | tumor protein p53 inducible nuclear protein 1                               | NM_033285      | Hs.682015 |
| A_24_P255252 | 1,36 | 0,0086 | 1,72 | 0,0008 | 1,35 | 0,0100 | TPT1P5   |                                                                             |                |           |
| A_23_P123503 | 5,23 | 0,0619 | 6,19 | 0,0294 | 5,89 | 0,0410 | TRIB1    | tribbles homolog 1 (Drosophila)                                             | NM_025195      | Hs.444947 |
| A_24_P252497 | 5,85 | 0,0036 | 7,50 | 0,0002 | 6,30 | 0,0016 | TRIB1    | tribbles pseudokinase 1                                                     | NM_025195      | Hs.444947 |
| A_23_P154065 | 2,69 | 0,0579 | 3,28 | 0,0220 | 2,95 | 0,0437 | TUBA4A   | tubulin, alpha 4a                                                           | NM_006000      | Hs.75318  |
| A_23_P154070 | 2,45 | 0,0785 |      |        |      |        | TUBA4A   | tubulin, alpha 4a"                                                          | NM_006000      | Hs.75318  |
| A_23_P84448  |      |        | 3,51 | 0,0521 |      |        | TUBA4A   | tubulin, alpha 4a                                                           | NM_006000      | Hs.75318  |
| A_23_P14939  | 8,02 | 0,0013 | 8,36 | 0,0006 | 6,81 | 0,0057 | TXNDC11  | thioredoxin domain containing 11                                            | NM_015914      | Hs.313847 |
| A_24_P107897 | 6,56 | 0,0000 | 7,49 | 0,0000 | 6,80 | 0,0000 | TXNDC11  | thioredoxin domain containing 11                                            | ENST0000035695 | Hs.313847 |
| A_23_P168229 | 7,27 | 0,0003 | 6,40 | 0,0010 | 6,71 | 0,0006 | TXNDC5   | thioredoxin domain containing 5 (endoplasmic reticulum)                     | NM_030810      | Hs.150837 |
| A_23_P18304  | 4,04 | 0,0656 | 4,61 | 0,0406 | 5,07 | 0,0220 | UBA5     | ubiquitin-like modifier activating enzyme 5                                 | NM_198329      | Hs.170737 |
| A_23_P56188  | 2,57 | 0,0163 |      |        |      |        | UBA52    | ubiquitin A-52 residue ribosomal protein fusion product 1                   | NM_001033930   | Hs.5308   |
| A_23_P56195  | 1,41 | 0,0232 | 1,98 | 0,0013 | 1,62 | 0,0096 | UBA52    | ubiquitin A-52 residue ribosomal protein fusion product 1                   | NM_001033930   | Hs.5308   |
| A_24_P173325 | 1,84 | 0,0420 |      |        |      |        | UBA52    | ubiquitin A-52 residue ribosomal protein fusion product 1                   | NM_001033930   | Hs.5308   |
| A_24_P194714 | 4,14 | 0,0044 | 5,19 | 0,0003 | 4,46 | 0,0021 | UBALD2   | UBA-like domain containing 2                                                | NM_182565      | Hs.709534 |
| A_23_P27215  | 2,45 | 0,0005 | 3,00 | 0,0000 | 2,58 | 0,0002 | UBB      | ubiquitin B                                                                 | NM_018955      | Hs.356190 |
| A_24_P113109 | 1,33 | 0,0192 | 2,03 | 0,0003 | 1,75 | 0,0021 | UBB      | ubiquitin B                                                                 | NM_018955      | Hs.356190 |
| A_23_P329740 | 3,41 | 0,0747 | 5,56 | 0,0028 | 3,54 | 0,0821 | UBC      | ubiquitin C                                                                 | NM_021009      | Hs.520348 |
| A_24_P266880 | 2,46 | 0,0087 | 3,24 | 0,0003 | 2,75 | 0,0021 | UBC      | ubiquitin C                                                                 | NM_021009      | Hs.520348 |
| A_24_P681301 | 1,58 | 0,0229 | 2,04 | 0,0032 | 1,70 | 0,0162 | UBC      | ubiquitin C                                                                 | NM_021009      | Hs.520348 |
| A_24_P889720 | 1,81 | 0,0048 | 2,49 | 0,0001 | 2,12 | 0,0009 | UBC      | ubiquitin C                                                                 | NM_021009      | Hs.520348 |
| A_23_P103905 | 5,82 | 0,0012 | 4,66 | 0,0088 | 4,85 | 0,0063 | UFC1     | ubiquitin-fold modifier conjugating enzyme 1                                | NM_016406      | Hs.301412 |
| A_23_P26084  | 5,58 | 0,0000 | 6,11 | 0,0000 | 6,33 | 0,0000 | VIMP     | selenoprotein S                                                             | NM_018445      | Hs.32148  |
| A_24_P912889 | 5,85 | 0,0671 |      |        |      |        | VIMP     | selenoprotein S                                                             | NM_203472      | Hs.32148  |
| A_32_P9753   | 4,42 | 0,0437 | 4,70 | 0,0365 | 5,32 | 0,0166 | VMP1     | transmembrane protein 49                                                    | BC024020       | Hs.708260 |
| A_23_P168211 | 4,82 | 0,0037 | 4,34 | 0,0087 | 4,77 | 0,0039 | VOPP1    | vesicular, overexpressed in cancer, pro-survival protein 1                  | NM_030796      | Hs.488307 |
| A_23_P371155 | 6,08 | 0,0042 | 6,09 | 0,0037 | 4,94 | 0,0225 | WTAP     | Wilms tumor 1 associated protein                                            | NM_004906      | Hs.446091 |
| A_23_P120845 | 4,15 | 0,0011 | 5,22 | 0,0000 | 4,10 | 0,0011 | XBP1     | X-box binding protein 1                                                     | NM_005080      | Hs.437638 |
| A_24_P100228 | 4,14 | 0,0339 | 5,00 | 0,0109 | 4,70 | 0,0182 | XBP1     | X-box binding protein 1                                                     | NM_001079539   | Hs.437638 |
| A_23_P254888 | 2,38 | 0,0316 | 2,82 | 0,0117 | 2,12 | 0,0771 | ZYX      | zyxin                                                                       | NM_003461      | Hs.490415 |
