# Supplementary material for: The transcriptional profiling of human in vivo-generated plasma cells identifies selective imbalances in monoclonal gammopathies
Source: PubMed Central journal article supplement (PMC5560601; doi:10.1371/journal.pone.0183264), 2017-08-17
Supplement: pone.0183264.s004.pdf [file pone.0183264.s004.pdf]

**Supplementary Table 2. Gene Ontology analysis.**The table shows the significant GO terms ( $P < 0.05$ , DAVID) with associated P-values, fold enrichment, genes and the manual categories used in the figures.

| PC-down signature                                                                                                        |                                                                                                         |                                    |           |                                                                                                                                            |                                                                                                                                                                                                                                                                                                                                                                                                                                                                                                                                                                                        |
|--------------------------------------------------------------------------------------------------------------------------|---------------------------------------------------------------------------------------------------------|------------------------------------|-----------|--------------------------------------------------------------------------------------------------------------------------------------------|----------------------------------------------------------------------------------------------------------------------------------------------------------------------------------------------------------------------------------------------------------------------------------------------------------------------------------------------------------------------------------------------------------------------------------------------------------------------------------------------------------------------------------------------------------------------------------------|
| Category                                                                                                                 | GO term                                                                                                 | P-value                            | Benjamini | Fold Enrichment                                                                                                                            | Genes                                                                                                                                                                                                                                                                                                                                                                                                                                                                                                                                                                                  |
| Transcription                                                                                                            | GO:006357~regulation of transcription from RNA polymerase II promoter                                   | 1.6E-02                            | 7.0E-01   | 1.7                                                                                                                                        | ATF7IP, CIITA, GLIS3, IL6, SP100, ELF4, HDAC10, SMAD3, PAX5, PAX4, NR4A3, HLT, ZNF254, SKAP1, FOXP1, HDACA, TRAK2, CSRNP3, SP2, ATXN7, SUPT4H1, NFIC                                                                                                                                                                                                                                                                                                                                                                                                                                   |
|                                                                                                                          | GO:0010628~positive regulation of gene expression                                                       | 4.8E-02                            | 9.2E-01   | 1.7                                                                                                                                        | ATF7IP, CIITA, GLIS3, IL6, SP100, ELF4, SMAD3, NR4A3, SKAP1, HDACA, MAPK1, TNFSF13B, REL, CSRNP3, ATXN7, SUPT4H1, NFIC                                                                                                                                                                                                                                                                                                                                                                                                                                                                 |
|                                                                                                                          | GO:0045893~positive regulation of transcription, DNA-dependent                                          | 4.0E-02                            | 9.2E-01   | 1.8                                                                                                                                        | ATF7IP, CIITA, GLIS3, IL6, SP100, ELF4, SMAD3, NR4A3, SKAP1, HDACA, REL, CSRNP3, ATXN7, SUPT4H1, NFIC                                                                                                                                                                                                                                                                                                                                                                                                                                                                                  |
|                                                                                                                          | GO:0051254~positive regulation of RNA metabolic process                                                 | 4.3E-02                            | 9.1E-01   | 1.8                                                                                                                                        | ATF7IP, CIITA, GLIS3, IL6, SP100, HDAC10, SMAD3, NR4A3, SKAP1, HDACA, REL, CSRNP3, ATXN7, SUPT4H1, NFIC                                                                                                                                                                                                                                                                                                                                                                                                                                                                                |
|                                                                                                                          | GO:0010605~negative regulation of macromolecule metabolic process                                       | 1.8E-02                            | 7.1E-01   | 1.7                                                                                                                                        | ATF7IP, CIITA, GLIS3, IL6, SP100, HDAC10, SMAD3, ZNF675, PAX5, PAX4, ZNF254, FOXF1, HDACA, NAB2, PER1, PEX14, PSM3E, INPP5D, SUPT4H1, NFIC, CLN8, BUB3                                                                                                                                                                                                                                                                                                                                                                                                                                 |
|                                                                                                                          | GO:0010558~negative regulation of macromolecule biosynthetic process                                    | 7.4E-03                            | 5.7E-01   | 2.0                                                                                                                                        | ATF7IP, CIITA, GLIS3, IL6, SP100, HDAC10, SMAD3, ZNF675, PAX5, PAX4, ZNF254, FOXF1, HDACA, NAB2, PEX14, PER1, INPP5D, SUPT4H1, NFIC                                                                                                                                                                                                                                                                                                                                                                                                                                                    |
|                                                                                                                          | GO:0031327~negative regulation of cellular biosynthetic process                                         | 9.5E-03                            | 6.1E-01   | 1.9                                                                                                                                        | ATF7IP, CIITA, GLIS3, IL6, SP100, HDAC10, SMAD3, ZNF675, PAX5, PAX4, ZNF254, FOXF1, HDACA, NAB2, PEX14, PER1, INPP5D, SUPT4H1, NFIC                                                                                                                                                                                                                                                                                                                                                                                                                                                    |
|                                                                                                                          | GO:0009890~negative regulation of biosynthetic process                                                  | 1.2E-02                            | 6.4E-01   | 1.9                                                                                                                                        | ATF7IP, CIITA, GLIS3, IL6, SP100, HDAC10, SMAD3, ZNF675, PAX5, PAX4, ZNF254, FOXF1, HDACA, NAB2, PEX14, PER1, INPP5D, SUPT4H1, NFIC                                                                                                                                                                                                                                                                                                                                                                                                                                                    |
|                                                                                                                          | GO:0000122~negative regulation of transcription from RNA polymerase II promoter                         | 2.5E-03                            | 4.3E-01   | 2.8                                                                                                                                        | ATF7IP, CIITA, GLIS3, SP100, HDAC10, PAX5, SMAD3, PAX4, ZNF254, FOXF1, HDACA, SUPT4H1, NFIC                                                                                                                                                                                                                                                                                                                                                                                                                                                                                            |
|                                                                                                                          | GO:0016481~negative regulation of transcription                                                         | 6.8E-03                            | 5.6E-01   | 2.1                                                                                                                                        | ATF7IP, CIITA, GLIS3, SP100, HDAC10, SMAD3, ZNF675, PAX5, PAX4, ZNF254, FOXF1, HDACA, NAB2, PEX14, PER1, SUPT4H1, NFIC                                                                                                                                                                                                                                                                                                                                                                                                                                                                 |
|                                                                                                                          | GO:0010629~negative regulation of gene expression                                                       | 1.5E-02                            | 7.1E-01   | 1.9                                                                                                                                        | ATF7IP, CIITA, GLIS3, SP100, HDAC10, SMAD3, ZNF675, PAX5, PAX4, ZNF254, FOXF1, HDACA, NAB2, PEX14, PER1, SUPT4H1, NFIC                                                                                                                                                                                                                                                                                                                                                                                                                                                                 |
|                                                                                                                          | GO:0045934~negative regulation of nucleobase, nucleoside, nucleotide and nucleic acid metabolic process | 1.8E-02                            | 7.2E-01   | 1.9                                                                                                                                        | ATF7IP, CIITA, GLIS3, SP100, HDAC10, SMAD3, ZNF675, PAX5, PAX4, ZNF254, FOXF1, HDACA, NAB2, PEX14, PER1, SUPT4H1, NFIC                                                                                                                                                                                                                                                                                                                                                                                                                                                                 |
|                                                                                                                          | GO:0051172~negative regulation of nitrogen compound metabolic process                                   | 2.0E-02                            | 7.3E-01   | 1.9                                                                                                                                        | ATF7IP, CIITA, GLIS3, SP100, HDAC10, SMAD3, ZNF675, PAX5, PAX4, ZNF254, FOXF1, HDACA, NAB2, PEX14, PER1, SUPT4H1, NFIC                                                                                                                                                                                                                                                                                                                                                                                                                                                                 |
|                                                                                                                          | GO:0045892~negative regulation of transcription, DNA-dependent                                          | 3.9E-03                            | 4.3E-01   | 2.4                                                                                                                                        | ATF7IP, CIITA, GLIS3, SP100, HDAC10, SMAD3, ZNF675, PAX5, PAX4, ZNF254, FOXF1, HDACA, PEX14, SUPT4H1, NFIC                                                                                                                                                                                                                                                                                                                                                                                                                                                                             |
|                                                                                                                          | GO:0051253~negative regulation of RNA metabolic process                                                 | 4.6E-03                            | 4.5E-01   | 2.4                                                                                                                                        | ATF7IP, CIITA, GLIS3, SP100, HDAC10, SMAD3, ZNF675, PAX5, PAX4, ZNF254, FOXF1, HDACA, PEX14, SUPT4H1, NFIC                                                                                                                                                                                                                                                                                                                                                                                                                                                                             |
|                                                                                                                          | GO:0051252~regulation of RNA metabolic process                                                          | 1.3E-11                            | 1.0E-08   | 2.3                                                                                                                                        | SUPT4H1, IL6, ZNF66, ZNF667, ZNF160, SMAD3, NR4A3, ZNF320, ZNF626, TRIM22, FOXF1, ZNF585B, NOTCH2, HDACA, CSRNP3, DLX6, SP2, ATXN7, ZNF117, NFIC, ZNF571                                                                                                                                                                                                                                                                                                                                                                                                                               |
|                                                                                                                          | GO:0006355~regulation of transcription, DNA-dependent                                                   | 1.3E-11                            | 7.1E-09   | 2.3                                                                                                                                        | SUPT4H1, IL6, ZNF66, ZNF667, ZNF160, SMAD3, NR4A3, ZNF320, ZNF626, TRIM22, FOXF1, ZNF585B, NOTCH2, HDACA, CSRNP3, DLX6, SP2, ATXN7, ZNF117, NFIC, ZNF571                                                                                                                                                                                                                                                                                                                                                                                                                               |
|                                                                                                                          | GO:0045449~regulation of transcription                                                                  | 9.9E-13                            | 1.6E-09   | 2.0                                                                                                                                        | ZNF85, ELF4, ZNF675, PAX5, ZKSCAN1, PAX4, ZNF347, ZNF254, SKAP1, RNF141, ZNF729, TRAK2, ZNF738, ZNF727, ZNF726, ZNF680, ZNF737, ZNF732, ZNF724P, ZNF493, ZNF43, ZNF63, ZNF283, L3MBTL4, SP100, ZNF479, ZNF490, HDAC10, ZNF813, HLT, ZNF134, ZNF714, ZNF716, ZNF431, ZNF98, ZNF99, GLIS3, ZNF430, ZNF468, ZNF331, TSC22D2, REL, ZNF709, ZNF429, ZNF223, TFD2P, PER1, PEX14, ZNF724P, ZNF493, ZNF43, AT7F7IP, CIITA, ZNF93, SNAPC5, L3MBTL4, ZNF239, ZNF667, ZNF160, SMAD3, NR4A3, ZNF320, ZNF626, TRIM22, FOXF1, ZNF585B, NOTCH2, HDACA, CSRNP3, DLX6, SP2, ATXN7, ZNF117, NFIC, ZNF571 |
|                                                                                                                          | GO:0006350~transcription                                                                                | 6.4E-10                            | 2.5E-07   | 2.0                                                                                                                                        | SUPT4H1, ZNF625, ZNF66, ZNF667, ZNF160, SMAD3, AFF3, ZFP3, NR4A3, ZNF320, ZNF626, FOXF1, ZNF585B, NOTCH2, HDACA, CSRNP3, SP2, ATXN7, ZNF318, ZNF716, NFIC, ZNF571                                                                                                                                                                                                                                                                                                                                                                                                                      |
|                                                                                                                          | Immune response                                                                                         | GO:0006959~humoral immune response | 2.5E-03   | 3.9E-01                                                                                                                                    | 5.1                                                                                                                                                                                                                                                                                                                                                                                                                                                                                                                                                                                    |
| GO:0002684~positive regulation of immune system process                                                                  |                                                                                                         | 3.1E-03                            | 4.2E-01   | 2.9                                                                                                                                        | CD83, MAPK1, CR1, IL6, TNFSF13B, C6, FCER2, IL4R, C5, INPP5D, SKAP1, FOXF1                                                                                                                                                                                                                                                                                                                                                                                                                                                                                                             |
| GO:0034341~response to interferon-gamma                                                                                  |                                                                                                         | 1.2E-02                            | 6.5E-01   | 17.1                                                                                                                                       | CIITA, KYNU, SP100                                                                                                                                                                                                                                                                                                                                                                                                                                                                                                                                                                     |
| GO:0002460~adaptive immune response based on somatic recombination of immune receptors built from Ig superfamily domains |                                                                                                         | 4.6E-02                            | 9.1E-01   | 3.7                                                                                                                                        | CR1, C6, C5, INPP5D, GNL1                                                                                                                                                                                                                                                                                                                                                                                                                                                                                                                                                              |
| GO:0002250~adaptive immune response                                                                                      |                                                                                                         | 4.6E-02                            | 9.1E-01   | 3.7                                                                                                                                        | CR1, C6, C5, INPP5D, GNL1                                                                                                                                                                                                                                                                                                                                                                                                                                                                                                                                                              |
| GO:0002443~leukocyte mediated immunity                                                                                   |                                                                                                         | 3.9E-03                            | 4.6E-01   | 4.6                                                                                                                                        | CR1, IL6, LYST, C6, C5, INPP5D, GNL1                                                                                                                                                                                                                                                                                                                                                                                                                                                                                                                                                   |
| GO:0002252~immune effector process                                                                                       |                                                                                                         | 2.4E-03                            | 4.7E-01   | 3.8                                                                                                                                        | CR1, IL6, TNFSF13B, LYST, C6, C5, INPP5D, GNL1, FOXF1                                                                                                                                                                                                                                                                                                                                                                                                                                                                                                                                  |
| GO:0002449~lymphocyte mediated immunity                                                                                  |                                                                                                         | 7.5E-03                            | 5.4E-01   | 4.9                                                                                                                                        | CR1, LYST, C6, C5, INPP5D, GNL1                                                                                                                                                                                                                                                                                                                                                                                                                                                                                                                                                        |
| GO:0006955~immune response                                                                                               |                                                                                                         | 7.2E-05                            | 2.2E-02   | 2.3                                                                                                                                        | HLA-DQB1, MAVS, KYNU, C6, C5, PAX5, HLA-DMB, SKAP1, CD96, IL4R, CNR2, MSA41, INPP5D, GNL1, CIITA, IL6, CR1, SP100, SMAD3, TRIM22, FOXF1, CD83, CCR6, TNFSF13B, PPBP, SP2, LYST, CD300LF                                                                                                                                                                                                                                                                                                                                                                                                |
| GO:0050778~positive regulation of immune response                                                                        |                                                                                                         | 4.2E-02                            | 9.2E-01   | 2.8                                                                                                                                        | MAPK1, CR1, TNFSF13B, C6, FCER2, C5, SKAP1                                                                                                                                                                                                                                                                                                                                                                                                                                                                                                                                             |
| GO:0045087~innate immune response                                                                                        | 1.1E-02                                                                                                 | 6.3E-01                            | 3.3       | MAVS, CIITA, CR1, KYNU, SP100, LYST, C6, C5                                                                                                |                                                                                                                                                                                                                                                                                                                                                                                                                                                                                                                                                                                        |
| Golgi transport & Trp metabolism                                                                                         | GO:0006891~intra-Golgi vesicle-mediated transport                                                       | 4.3E-02                            | 9.1E-01   | 9.0                                                                                                                                        | FACS1, COG5, GOSR1                                                                                                                                                                                                                                                                                                                                                                                                                                                                                                                                                                     |
|                                                                                                                          | GO:0019442~tryptophan catabolic process to acetyl-CoA                                                   | 3.5E-02                            | 8.9E-01   | 57.1                                                                                                                                       | TD02, KYNU                                                                                                                                                                                                                                                                                                                                                                                                                                                                                                                                                                             |
|                                                                                                                          | GO:0019748~secondary metabolic process                                                                  | 4.9E-02                            | 9.2E-01   | 3.6                                                                                                                                        | TD02, KYNU, CYP1B1, ADH5, NADSYN1                                                                                                                                                                                                                                                                                                                                                                                                                                                                                                                                                      |
| <b>PC-up signature</b>                                                                                                   |                                                                                                         |                                    |           |                                                                                                                                            |                                                                                                                                                                                                                                                                                                                                                                                                                                                                                                                                                                                        |
| Category                                                                                                                 | GO term                                                                                                 | P-value                            | Benjamini | Fold Enrichment                                                                                                                            | Genes                                                                                                                                                                                                                                                                                                                                                                                                                                                                                                                                                                                  |
| Apoptosis (negative)                                                                                                     | GO:0006916~anti-apoptosis                                                                               | 1.7E-05                            | 1.8E-03   | 5.9                                                                                                                                        | LOC400750, HSP90B1, SYVN1, MCL1, TXNDC5, DAD1, UBC, UBB, PIM2, HSPA5, UBA52, CD27                                                                                                                                                                                                                                                                                                                                                                                                                                                                                                      |
|                                                                                                                          | GO:0012501~programmed cell death                                                                        | 3.4E-03                            | 1.2E-01   | 2.5                                                                                                                                        | MCL1, TMBIM6, PIM2, CTNBN1, CLPTM1L, CDKN1B, DAD1, UBC, UBB, ACIN1, SRGN, CD27, UBA52, TP53NP1                                                                                                                                                                                                                                                                                                                                                                                                                                                                                         |
|                                                                                                                          | GO:0008219~cell death                                                                                   | 1.3E-02                            | 2.9E-01   | 2.1                                                                                                                                        | MCL1, TMBIM6, PIM2, CTNBN1, CLPTM1L, CDKN1B, DAD1, UBC, UBB, ACIN1, SRGN, CD27, UBA52, TP53NP1                                                                                                                                                                                                                                                                                                                                                                                                                                                                                         |
|                                                                                                                          | GO:0016265~death                                                                                        | 1.4E-02                            | 2.9E-01   | 2.1                                                                                                                                        | MCL1, TMBIM6, PIM2, CTNBN1, CLPTM1L, CDKN1B, DAD1, UBC, UBB, ACIN1, SRGN, CD27, UBA52, TP53NP1                                                                                                                                                                                                                                                                                                                                                                                                                                                                                         |
|                                                                                                                          | GO:0006915~apoptosis                                                                                    | 8.1E-03                            | 2.1E-01   | 2.4                                                                                                                                        | MCL1, TMBIM6, PIM2, CTNBN1, CLPTM1L, DAD1, UBC, UBB, ACIN1, SRGN, CD27, UBA52, TP53NP1                                                                                                                                                                                                                                                                                                                                                                                                                                                                                                 |
|                                                                                                                          | GO:0043066~negative regulation of apoptosis                                                             | 1.8E-05                            | 1.7E-03   | 4.3                                                                                                                                        | SYVN1, MCL1, TMBIM6, PIM1, PIM2, LOC400750, HSP90B1, NME1, TXNDC5, UBC, DAD1, UBB, HSPA5, CD27, UBA52                                                                                                                                                                                                                                                                                                                                                                                                                                                                                  |
|                                                                                                                          | GO:0043069~negative regulation of programmed cell death                                                 | 2.1E-05                            | 1.9E-03   | 4.3                                                                                                                                        | SYVN1, MCL1, TMBIM6, PIM1, PIM2, LOC400750, HSP90B1, NME1, TXNDC5, UBC, DAD1, UBB, HSPA5, CD27, UBA52                                                                                                                                                                                                                                                                                                                                                                                                                                                                                  |
|                                                                                                                          | GO:0060548~negative regulation of cell death                                                            | 2.2E-05                            | 1.8E-03   | 4.3                                                                                                                                        | SYVN1, MCL1, TMBIM6, PIM1, PIM2, LOC400750, HSP90B1, NME1, TXNDC5, UBC, DAD1, UBB, HSPA5, CD27, UBA52                                                                                                                                                                                                                                                                                                                                                                                                                                                                                  |
|                                                                                                                          | GO:0042981~regulation of apoptosis                                                                      | 3.1E-04                            | 1.9E-02   | 2.6                                                                                                                                        | SYVN1, MCL1, TMBIM6, PIM1, PIM2, SLAMF7, CALR, LOC400750, HSP90B1, CDKN1B, NME1, TXNDC5, UBC, DAD1, UBB, HSPA5, BMP7, UBA52, CD27, TP53NP1                                                                                                                                                                                                                                                                                                                                                                                                                                             |
|                                                                                                                          | GO:0043067~regulation of programmed cell death                                                          | 3.5E-04                            | 1.9E-02   | 2.6                                                                                                                                        | SYVN1, MCL1, TMBIM6, PIM1, PIM2, SLAMF7, CALR, LOC400750, HSP90B1, CDKN1B, NME1, TXNDC5, UBC, DAD1, UBB, HSPA5, BMP7, UBA52, CD27, TP53NP1                                                                                                                                                                                                                                                                                                                                                                                                                                             |
| GO:0010941~regulation of cell death                                                                                      | 3.6E-04                                                                                                 | 1.9E-02                            | 2.6       | SYVN1, MCL1, TMBIM6, PIM1, PIM2, SLAMF7, CALR, LOC400750, HSP90B1, CDKN1B, NME1, TXNDC5, UBC, DAD1, UBB, HSPA5, BMP7, UBA52, CD27, TP53NP1 |                                                                                                                                                                                                                                                                                                                                                                                                                                                                                                                                                                                        |
| Chromatin assembly                                                                                                       | GO:0065003~macromolecular complex assembly                                                              | 3.1E-04                            | 1.8E-02   | 2.8                                                                                                                                        | HIST1H2BC, HIST1H2BD, HIST1H2BE, CDDC8C, HIST1H2BG, HIST1H2AD, CDK9, RPL24, CALR, CTNBN1, HIST1H2BM, HIST1H2BN, HIST2H2BE, HIST1H2BI, RPS15, HIST1H2BJ, TUBA4A, PEPB1, HIST1H2AM, HIST3H2BI                                                                                                                                                                                                                                                                                                                                                                                            |
|                                                                                                                          | GO:0043933~macromolecular complex subunit organization                                                  | 6.3E-04                            | 3.1E-02   | 2.6                                                                                                                                        | HIST1H2BC, HIST1H2BD, HIST1H2BE, CDDC8C, HIST1H2BG, HIST1H2AD, CDK9, RPL24, CALR, CTNBN1, HIST1H2BM, HIST1H2BN, HIST2H2BE, HIST1H2BI, RPS15, HIST1H2BJ, TUBA4A, PEPB1, HIST1H2AM, HIST3H2BI                                                                                                                                                                                                                                                                                                                                                                                            |
|                                                                                                                          | GO:0006323~DNA packaging                                                                                | 1.1E-06                            | 2.8E-04   | 9.4                                                                                                                                        | HIST1H2BC, HIST1H2BD, HIST1H2BE, HIST1H2AD, HIST1H2BG, HIST1H2BM, HIST1H2BN, HIST2H2BE, HIST1H2BI, ACIN1, HIST3H2BB, HIST1H2AM                                                                                                                                                                                                                                                                                                                                                                                                                                                         |
|                                                                                                                          | GO:0051276~chromosome organization                                                                      | 4.4E-03                            | 1.4E-01   | 2.7                                                                                                                                        | HIST1H2BC, HIST1H2BD, HIST1H2BE, HIST1H2AD, HIST1H2BG, HIST1H2BM, HIST1H2BN, HIST2H2BE, HIST1H2BI, SMARCC2, HIST1H2BJ, ACIN1, HIST3H2BB, HIST1H2AM, HDAC7                                                                                                                                                                                                                                                                                                                                                                                                                              |
|                                                                                                                          | GO:0006333~chromatin assembly or disassembly                                                            | 2.1E-06                            | 2.5E-04   | 8.7                                                                                                                                        | HIST1H2BC, HIST1H2BD, HIST1H2BE, HIST1H2AD, HIST1H2BG, HIST1H2BM, HIST1H2BN, HIST2H2BE, HIST1H2BI, SMARCC2, HIST1H2BJ, HIST3H2BB, HIST1H2AM                                                                                                                                                                                                                                                                                                                                                                                                                                            |
|                                                                                                                          | GO:0006325~chromatin organization                                                                       | 2.2E-03                            | 8.9E-02   | 3.2                                                                                                                                        | HIST1H2BC, HIST1H2BD, HIST1H2BE, HIST1H2AD, HIST1H2BG, HIST1H2BM, HIST1H2BN, HIST2H2BE, HIST1H2BI, SMARCC2, HIST1H2BJ, HIST3H2BB, HIST1H2AM, HDAC7                                                                                                                                                                                                                                                                                                                                                                                                                                     |
|                                                                                                                          | GO:0034622~cellular macromolecular complex assembly                                                     | 3.0E-05                            | 2.2E-03   | 4.5                                                                                                                                        | HIST1H2BC, HIST1H2BD, HIST1H2BE, HIST1H2AD, RPL24, CALR, HIST1H2BM, HIST1H2BN, HIST2H2BE, HIST1H2BI, RPS15, HIST1H2BJ, TUBA4A, HIST1H2AM, HIST3H2BB                                                                                                                                                                                                                                                                                                                                                                                                                                    |
|                                                                                                                          | GO:0034621~cellular macromolecular complex subunit organization                                         | 9.1E-05                            | 6.4E-03   | 4.0                                                                                                                                        | HIST1H2BC, HIST1H2BD, HIST1H2BE, HIST1H2AD, RPL24, CALR, HIST1H2BM, HIST1H2BN, HIST2H2BE, HIST1H2BI, RPS15, HIST1H2BJ, TUBA4A, HIST1H2AM, HIST3H2BB                                                                                                                                                                                                                                                                                                                                                                                                                                    |
|                                                                                                                          | GO:0006334~nucleosome assembly                                                                          | 8.5E-07                            | 3.0E-04   | 11.8                                                                                                                                       | HIST1H2BC, HIST1H2BD, HIST1H2BE, HIST1H2AD, RPL24, CALR, HIST1H2BM, HIST1H2BN, HIST2H2BE, HIST1H2BI, RPS15, HIST1H2BJ, TUBA4A, HIST1H2AM, HIST3H2BB                                                                                                                                                                                                                                                                                                                                                                                                                                    |
|                                                                                                                          | GO:0031497~chromatin assembly                                                                           | 1.1E-06                            | 2.4E-04   | 11.4                                                                                                                                       | HIST1H2BC, HIST1H2BD, HIST1H2BE, HIST1H2AD, RPL24, CALR, HIST1H2BM, HIST1H2BN, HIST2H2BE, HIST1H2BI, RPS15, HIST1H2BJ, TUBA4A, HIST1H2AM, HIST3H2BB                                                                                                                                                                                                                                                                                                                                                                                                                                    |
| Protein transport                                                                                                        | GO:0065004~protein-DNA complex assembly                                                                 | 1.6E-06                            | 2.8E-04   | 10.9                                                                                                                                       | HIST1H2BC, HIST1H2BD, HIST1H2BE, HIST1H2AD, RPL24, CALR, HIST1H2BM, HIST1H2BN, HIST2H2BE, HIST1H2BI, RPS15, HIST1H2BJ, TUBA4A, HIST1H2AM, HIST3H2BB                                                                                                                                                                                                                                                                                                                                                                                                                                    |
|                                                                                                                          | GO:0034728~nucleosome organization                                                                      | 1.9E-06                            | 2.8E-04   | 10.6                                                                                                                                       | HIST1H2BC, HIST1H2BD, HIST1H2BE, HIST1H2AD, RPL24, CALR, HIST1H2BM, HIST1H2BN, HIST2H2BE, HIST1H2BI, RPS15, HIST1H2BJ, TUBA4A, HIST1H2AM, HIST3H2BB                                                                                                                                                                                                                                                                                                                                                                                                                                    |
|                                                                                                                          | GO:0034613~cellular protein localization                                                                | 3.3E-02                            | 4.5E-01   | 2.4                                                                                                                                        | AP1G1, ERP29, CALR, SSR4, SEC61A1, SSR2, SRG, SSR3, CTNBN1                                                                                                                                                                                                                                                                                                                                                                                                                                                                                                                             |
|                                                                                                                          | GO:0070727~cellular macromolecule localization                                                          | 3.4E-02                            | 4.5E-01   | 2.4                                                                                                                                        | AP1G1, ERP29, CALR, SSR4, SEC61A1, SSR2, SRG, SSR3, CTNBN1                                                                                                                                                                                                                                                                                                                                                                                                                                                                                                                             |
|                                                                                                                          | GO:0008104~protein localization                                                                         | 1.3E-02                            | 2.9E-01   | 2.0                                                                                                                                        | AP1G1, RBP1, ERP29, PDIA4, LMAN2, CALR, CTNBN1, PREB, HSP90B1, SEC22B, GNAS, SSR4, SEC61A1, SRGN, SSR2, SSR3                                                                                                                                                                                                                                                                                                                                                                                                                                                                           |
|                                                                                                                          | GO:0015031~protein transport                                                                            | 2.0E-02                            | 3.6E-01   | 2.0                                                                                                                                        | AP1G1, RBP1, ERP29, PDIA4, LMAN2, CALR, PREB, HSP90B1, SEC22B, GNAS, SSR4, SEC61A1, SSR2, SSR3                                                                                                                                                                                                                                                                                                                                                                                                                                                                                         |
|                                                                                                                          | GO:0045184~establishment of protein localization                                                        | 2.1E-02                            | 3.7E-01   | 2.0                                                                                                                                        | AP1G1, RBP1, ERP29, PDIA4, LMAN2, CALR, PREB, HSP90B1, SEC22B, GNAS, SSR4, SEC61A1, SSR2, SSR3                                                                                                                                                                                                                                                                                                                                                                                                                                                                                         |
|                                                                                                                          | GO:0009306~protein secretion                                                                            | 3.2E-02                            | 4.5E-01   | 10.6                                                                                                                                       | ERP29, GNAS, PDIA4                                                                                                                                                                                                                                                                                                                                                                                                                                                                                                                                                                     |
|                                                                                                                          | GO:0046907~intracellular transport                                                                      | 2.4E-03                            | 8.9E-02   | 2.5                                                                                                                                        | NUDT7, AP1G1, ERP29, CALR, PREB, TXNDC5, RPS15, SEC22B, GNAS, GOLGA5, SSR4, SEC61A1, SSR2, SSR3, FTL                                                                                                                                                                                                                                                                                                                                                                                                                                                                                   |
|                                                                                                                          | GO:0048193~Golgi vesicle transport                                                                      | 6.6E-03                            | 1.9E-01   | 5.0                                                                                                                                        | PREB, AP1G1, TXNDC5, SEC22B, GOLGA5, FTL                                                                                                                                                                                                                                                                                                                                                                                                                                                                                                                                               |
| Ribosome & translation                                                                                                   | GO:0006414~translational elongation                                                                     | 8.3E-19                            | 8.7E-16   | 20.7                                                                                                                                       | RPL13, RPL35, RPL27A, RPS9, EEF2, RPL24, RPS8, RPS28, RPL18A, RPS16, RPL13A, RPLP0, RPS15, RPL8, UBC, RPL3, UBB, RPL12, UBA52                                                                                                                                                                                                                                                                                                                                                                                                                                                          |
|                                                                                                                          | GO:0042257~ribosomal subunit assembly                                                                   | 2.7E-02                            | 4.2E-01   | 73.3                                                                                                                                       | RPS15, RPL24                                                                                                                                                                                                                                                                                                                                                                                                                                                                                                                                                                           |
|                                                                                                                          | GO:0042254~ribosome biogenesis                                                                          | 2.4E-02                            | 4.0E-01   | 4.5                                                                                                                                        | RPS28, RPS16, RPL9, RPS15, RPL24                                                                                                                                                                                                                                                                                                                                                                                                                                                                                                                                                       |
|                                                                                                                          | GO:0042274~ribosomal small subunit biogenesis                                                           | 4.2E-03                            | 1.4E-01   | 30.0                                                                                                                                       | RPS28, RPS16, RPS15                                                                                                                                                                                                                                                                                                                                                                                                                                                                                                                                                                    |
|                                                                                                                          | GO:0006412~translation                                                                                  | 1.7E-12                            | 8.9E-10   | 7.3                                                                                                                                        | RBP1, RPL13, PABPC4, RPL35, RPL27A, RPS9, EEF2, RPL24, RPS8, RPS28, RPL18A, RPS16, RPL13A, RPLP0, EIF3E, RPS15, RPL8, UBC, RPL3, UBB, RPL12, UBA52                                                                                                                                                                                                                                                                                                                                                                                                                                     |

|                                                                |                                                                       |         |         |                           |                                                                                             |
|----------------------------------------------------------------|-----------------------------------------------------------------------|---------|---------|---------------------------|---------------------------------------------------------------------------------------------|
| Homeostasis                                                    | GO:0042502--homeostatic process                                       | 3.8E-02 | 4.9E-01 | 1.9                       | ALDOA, P4HB, MCL1, GRXCR1, PDIA5, PDIA4, CALR, CTNNB1, TXNDC11, HSP90B1, TXNDC5, ACIN1, FTL |
|                                                                | GO:0019725--cellular homeostasis                                      | 9.5E-03 | 2.4E-01 | 2.5                       | ALDOA, P4HB, TXNDC11, HSP90B1, MCL1, TXNDC5, GRXCR1, PDIA5, PDIA4, CALR, FTL                |
|                                                                | GO:0045454--cell redox homeostasis                                    | 2.5E-04 | 1.7E-02 | 10.5                      | P4HB, TXNDC11, TXNDC5, GRXCR1, PDIA5, PDIA4                                                 |
|                                                                | GO:0051208--sequestering of calcium ion                               | 2.7E-02 | 4.2E-01 | 73.3                      | HSP90B1, CALR                                                                               |
|                                                                | GO:0032269--negative regulation of cellular protein metabolic process | 2.3E-02 | 3.9E-01 | 3.7                       | EIF3E, UBC, PEBP1, UBB, CALR, UBA52                                                         |
| Protein folding & catabolism                                   | GO:0051248--negative regulation of protein metabolic process          | 2.7E-02 | 4.2E-01 | 3.5                       | EIF3E, UBC, PEBP1, UBB, CALR, UBA52                                                         |
|                                                                | GO:0030433--ER-associated protein catabolic process                   | 2.0E-06 | 2.7E-04 | 27.5                      | HSP90B1, SYVN1, KIAA0368, UBC, UBB, UBA52                                                   |
|                                                                | GO:0043161--proteasomal ubiquitin-dependent protein catabolic process | 2.3E-03 | 8.9E-02 | 6.5                       | HSP90B1, SYVN1, KIAA0368, UBC, UBB, UBA52                                                   |
|                                                                | GO:0010498--proteasomal protein catabolic process                     | 2.3E-03 | 8.9E-02 | 6.5                       | HSP90B1, SYVN1, KIAA0368, UBC, UBB, UBA52                                                   |
|                                                                | GO:0044092--negative regulation of molecular function                 | 3.2E-02 | 4.5E-01 | 2.6                       | LOC400750, CDKN1B, RGS1, PIN1, UBC, UBB, HSPA5, UBA52, TRIB1                                |
|                                                                | GO:0043086--negative regulation of catalytic activity                 | 3.9E-02 | 4.9E-01 | 2.8                       | LOC400750, CDKN1B, RGS1, UBC, UBB, HSPA5, UBA52, TRIB1                                      |
|                                                                | GO:0006457--protein folding                                           | 1.1E-03 | 4.9E-02 | 5.0                       | TOR3A, HSP90B1, PPIB, GRXCR1, ERP29, PDIA5, CALR, FKBP2                                     |
| Cell communication                                             | GO:0010647--positive regulation of cell communication                 | 2.9E-03 | 1.0E-01 | 3.3                       | BST2, GOLPH3, UBC, PEBP1, UBB, PIM2, BMP7, UBA52, CD27, CTNNB1                              |
|                                                                | GO:0042062--long-term strengthening of neuromuscular junction         | 7.9E-04 | 3.7E-02 | 66.0                      | UBC, UBB, UBA52                                                                             |
|                                                                | GO:0008582--regulation of synaptic growth at neuromuscular junction   | 1.6E-03 | 7.0E-02 | 47.1                      | UBC, UBB, UBA52                                                                             |
|                                                                | GO:0050806--positive regulation of synaptic transmission              | 3.8E-02 | 4.8E-01 | 9.7                       | UBC, UBB, UBA52                                                                             |
|                                                                | GO:0051971--positive regulation of transmission of nerve impulse      | 4.4E-02 | 5.2E-01 | 8.9                       | UBC, UBB, UBA52                                                                             |
| GO:0031646--positive regulation of neurological system process | 4.8E-02                                                               | 5.5E-01 | 8.5     | UBC, UBB, UBA52           |                                                                                             |
| Differentiation                                                | GO:0051963--regulation of synaptogenesis                              | 1.1E-02 | 2.7E-01 | 18.3                      | UBC, UBB, UBA52                                                                             |
|                                                                | GO:0050807--regulation of synapse organization                        | 1.5E-02 | 3.1E-01 | 15.7                      | UBC, UBB, UBA52                                                                             |
|                                                                | GO:0050803--regulation of synapse structure and activity              | 2.0E-02 | 3.6E-01 | 13.7                      | UBC, UBB, UBA52                                                                             |
|                                                                | GO:0048742--regulation of skeletal muscle fiber development           | 2.1E-02 | 3.7E-01 | 13.2                      | UBC, UBB, UBA52                                                                             |
|                                                                | GO:0048641--regulation of skeletal muscle tissue development          | 2.8E-02 | 4.2E-01 | 11.4                      | UBC, UBB, UBA52                                                                             |
|                                                                | GO:0051153--regulation of striated muscle cell differentiation        | 3.4E-02 | 4.6E-01 | 10.3                      | UBC, UBB, UBA52                                                                             |
|                                                                | GO:0007411--axon guidance                                             | 1.6E-02 | 3.2E-01 | 5.1                       | UBC, RPL24, UBB, BMP7, UBA52                                                                |
|                                                                | GO:0051147--regulation of muscle cell differentiation                 | 4.8E-02 | 5.5E-01 | 8.5                       | UBC, UBB, UBA52                                                                             |
|                                                                | GO:0045669--positive regulation of osteoblast differentiation         | 2.1E-02 | 3.7E-01 | 13.2                      | GNAS, BMP7, CTNNB1                                                                          |
|                                                                | GO:0045667--regulation of osteoblast differentiation                  | 6.8E-03 | 1.9E-01 | 10.2                      | GNAS, BMP7, HDAC7, CTNNB1                                                                   |
|                                                                | GO:0030278--regulation of ossification                                | 5.4E-03 | 1.6E-01 | 7.1                       | GNAS, BMP7, HDAC7, SRGN, CTNNB1                                                             |
|                                                                | GO:0045597--positive regulation of cell differentiation               | 1.8E-02 | 3.4E-01 | 3.4                       | NME1, GNAS, ACIN1, BMP7, CD27, FND3C3B, CTNNB1                                              |
|                                                                | GO:0051094--positive regulation of developmental process              | 1.3E-02 | 2.9E-01 | 3.2                       | NME1, GNAS, ACIN1, BMP7, HDAC7, FND3C3B, CTNNB1                                             |
|                                                                | GO:0002761--regulation of myeloid leukocyte differentiation           | 5.9E-03 | 1.7E-01 | 10.7                      | NME1, GNAS, ACIN1, CTNNB1                                                                   |
| GO:0045637--regulation of myeloid cell differentiation         | 2.5E-02                                                               | 4.1E-01 | 6.3     | NME1, GNAS, ACIN1, CTNNB1 |                                                                                             |

#### Overlap PC-up & ASC signatures

| Category                                       | GO term                                                               | P-value | Benjamini | Fold Enrichment | Genes                                                    |
|------------------------------------------------|-----------------------------------------------------------------------|---------|-----------|-----------------|----------------------------------------------------------|
| Apoptosis (negative & positive)                | GO:0006916--anti-apoptosis                                            | 1.3E-03 | 3.9E-01   | 9.9             | HSP90B1, TXNDC5, UBC, UBB, HSPA5                         |
|                                                | GO:0043066--negative regulation of apoptosis                          | 9.3E-03 | 2.9E-01   | 5.8             | HSP90B1, TXNDC5, UBC, UBB, HSPA5                         |
|                                                | GO:0043069--negative regulation of programmed cell death              | 9.8E-03 | 2.6E-01   | 5.7             | HSP90B1, TXNDC5, UBC, UBB, HSPA5                         |
|                                                | GO:0060548--negative regulation of cell death                         | 9.8E-03 | 2.5E-01   | 5.7             | HSP90B1, TXNDC5, UBC, UBB, HSPA5                         |
|                                                | GO:0042981--regulation of apoptosis                                   | 2.3E-03 | 2.5E-01   | 4.1             | HSP90B1, TXNDC5, UBC, UBB, HSPA5, SLAMF7, CALR, TP53INP1 |
|                                                | GO:0043067--regulation of programmed cell death                       | 2.5E-03 | 2.0E-01   | 4.0             | HSP90B1, TXNDC5, UBC, UBB, HSPA5, SLAMF7, CALR, TP53INP1 |
|                                                | GO:0010941--regulation of cell death                                  | 2.5E-03 | 1.7E-01   | 4.0             | HSP90B1, TXNDC5, UBC, UBB, HSPA5, SLAMF7, CALR, TP53INP1 |
|                                                | GO:0006917--induction of apoptosis                                    | 3.9E-02 | 4.1E-01   | 5.1             | UBC, UBB, SLAMF7, TP53INP1                               |
|                                                | GO:0012502--induction of programmed cell death                        | 4.0E-02 | 4.0E-01   | 5.1             | UBC, UBB, SLAMF7, TP53INP1                               |
| Protein transport                              | GO:0006605--protein targeting                                         | 1.4E-02 | 2.8E-01   | 7.6             | CALR, SEC61A1, SSR2, SSR3                                |
|                                                | GO:0006886--intracellular protein transport                           | 1.1E-02 | 2.6E-01   | 5.5             | CALR, SSR4, SEC61A1, SSR2, SSR3                          |
|                                                | GO:0034613--cellular protein localization                             | 1.5E-02 | 2.9E-01   | 5.0             | CALR, SSR4, SEC61A1, SSR2, SSR3                          |
|                                                | GO:0070727--cellular macromolecule localization                       | 1.6E-02 | 2.8E-01   | 5.0             | CALR, SSR4, SEC61A1, SSR2, SSR3                          |
|                                                | GO:0015031--protein transport                                         | 8.1E-03 | 3.1E-01   | 3.8             | HSP90B1, SEC22B, CALR, SSR4, SEC61A1, SSR2, SSR3         |
|                                                | GO:0045184--establishment of protein localization                     | 8.4E-03 | 2.9E-01   | 3.7             | HSP90B1, SEC22B, CALR, SSR4, SEC61A1, SSR2, SSR3         |
|                                                | GO:0008104--protein localization                                      | 1.6E-02 | 2.7E-01   | 3.3             | HSP90B1, SEC22B, CALR, SSR4, SEC61A1, SSR2, SSR3         |
|                                                | GO:0006613--cotranslational protein targeting to membrane             | 2.8E-02 | 3.4E-01   | 68.3            | SSR2, SSR3                                               |
|                                                | GO:0046907--intracellular transport                                   | 3.9E-03 | 2.2E-01   | 4.4             | TXNDC5, SEC22B, CALR, SSR4, SEC61A1, SSR2, SSR3          |
| GO:0006465--signal peptide processing          | 1.9E-02                                                               | 2.9E-01 | 102.5     | SEC11C, SPCS1   |                                                          |
| Protein catabolism                             | GO:0051604--protein maturation                                        | 3.4E-02 | 3.9E-01   | 10.1            | SEC11C, SPCS1, CALR                                      |
|                                                | GO:0006508--proteolysis                                               | 3.5E-02 | 3.9E-01   | 2.7             | HSP90B1, SEC11C, UBC, UFC1, SPCS1, UBA5, UBB             |
|                                                | GO:0030433--ER-associated protein catabolic process                   | 1.4E-03 | 2.4E-01   | 51.2            | HSP90B1, UBC, UBB                                        |
|                                                | GO:0010498--proteasomal protein catabolic process                     | 2.4E-02 | 3.3E-01   | 12.1            | HSP90B1, UBC, UBB                                        |
|                                                | GO:0043161--proteasomal ubiquitin-dependent protein catabolic process | 2.4E-02 | 3.3E-01   | 12.1            | HSP90B1, UBC, UBB                                        |
|                                                | GO:0043632--modification-dependent macromolecule catabolic process    | 4.5E-02 | 4.1E-01   | 3.6             | HSP90B1, UBC, UFC1, UBA5, UBB                            |
|                                                | GO:0019941--modification-dependent protein catabolic process          | 4.5E-02 | 4.1E-01   | 3.6             | HSP90B1, UBC, UFC1, UBA5, UBB                            |
|                                                | GO:0043086--negative regulation of catalytic activity                 | 2.7E-02 | 3.5E-01   | 5.9             | UBC, UBB, HSPA5, TRIB1                                   |
|                                                | GO:0044092--negative regulation of molecular function                 | 4.4E-02 | 4.1E-01   | 4.9             | UBC, UBB, HSPA5, TRIB1                                   |
|                                                | GO:0042062--long-term strengthening of neuromuscular junction         | 1.2E-02 | 2.5E-01   | 164.0           | UBC, UBB                                                 |
|                                                | GO:0008582--regulation of synaptic growth at neuromuscular junction   | 1.6E-02 | 2.7E-01   | 117.1           | UBC, UBB                                                 |
| GO:0051963--regulation of synaptogenesis       | 4.2E-02                                                               | 4.1E-01 | 45.5      | UBC, UBB        |                                                          |
| GO:0050807--regulation of synapse organization | 4.9E-02                                                               | 4.3E-01 | 39.0      | UBC, UBB        |                                                          |
| Ion homeostasis                                | GO:0051208--sequestering of calcium ion                               | 7.1E-03 | 3.1E-01   | 273.3           | HSP90B1, CALR                                            |
|                                                | GO:0051238--sequestering of metal ion                                 | 1.6E-02 | 2.7E-01   | 117.1           | HSP90B1, CALR                                            |
|                                                | GO:0019725--cellular homeostasis                                      | 2.3E-02 | 3.3E-01   | 4.4             | P4HB, TXNDC11, HSP90B1, TXNDC5, CALR                     |
|                                                | GO:0045454--cell redox homeostasis                                    | 9.7E-03 | 2.8E-01   | 19.5            | P4HB, TXNDC11, TXNDC5                                    |

#### Overlap Top2000 PC-upregulated genes & ASC signature

| Category | GO term                                                  | P-value | Benjamini | Fold Enrichment | Genes                                                  |
|----------|----------------------------------------------------------|---------|-----------|-----------------|--------------------------------------------------------|
|          | GO:0006916--anti-apoptosis                               | 2.9E-03 | 8.1E-02   | 6.1             | ATF5, HSP90B1, TXNDC5, UBC, UBB, HSPA5                 |
|          | GO:0043066--negative regulation of apoptosis             | 2.6E-02 | 3.0E-01   | 3.5             | ATF5, HSP90B1, TXNDC5, UBC, UBB, HSPA5                 |
|          | GO:0043069--negative regulation of programmed cell death | 2.7E-02 | 3.0E-01   | 3.5             | ATF5, HSP90B1, TXNDC5, UBC, UBB, HSPA5                 |
|          | GO:0060548--negative regulation of cell death            | 2.8E-02 | 2.9E-01   | 3.5             | ATF5, HSP90B1, TXNDC5, UBC, UBB, HSPA5                 |
|          | GO:0043065--positive regulation of apoptosis             | 4.1E-03 | 9.4E-02   | 3.9             | MAGED1, ERN1, UBC, RPS27L, UBB, SLAMF7, RPS6, TP53INP1 |
|          | GO:0043068--positive regulation of programmed cell death | 4.2E-03 | 9.3E-02   | 3.8             | MAGED1, ERN1, UBC, RPS27L, UBB, SLAMF7, RPS6, TP53INP1 |

|                                                       |                                                                          |         |         |                                                 |                                                                                                                 |
|-------------------------------------------------------|--------------------------------------------------------------------------|---------|---------|-------------------------------------------------|-----------------------------------------------------------------------------------------------------------------|
| Apoptosis                                             | GO:0010942--positive regulation of cell death                            | 4.3E-03 | 9.2E-02 | 3,8                                             | MAGED1, ERN1, UBC, RPS27L, UBB, SLAMF7, RPS6, TP53INP1                                                          |
|                                                       | GO:0006917--induction of apoptosis                                       | 4.0E-03 | 1.0E-01 | 4,6                                             | MAGED1, ERN1, UBC, RPS27L, UBB, SLAMF7, TP53INP1                                                                |
|                                                       | GO:0012502--induction of programmed cell death                           | 4.0E-03 | 9.7E-02 | 4,5                                             | MAGED1, ERN1, UBC, RPS27L, UBB, SLAMF7, TP53INP1                                                                |
|                                                       | GO:0042981--regulation of apoptosis                                      | 8.2E-05 | 3.9E-03 | 3,6                                             | RPS27L, SLAMF7, CALR, RPS6, MAGED1, ATF5, HSP90B1, VCP, TXNDC5, ERN1, UBC, UBB, HSPA5, TP53INP1                 |
|                                                       | GO:0043067--regulation of programmed cell death                          | 9.0E-05 | 4.0E-03 | 3,6                                             | RPS27L, SLAMF7, CALR, RPS6, MAGED1, ATF5, HSP90B1, VCP, TXNDC5, ERN1, UBC, UBB, HSPA5, TP53INP1                 |
|                                                       | GO:0010941--regulation of cell death                                     | 9.4E-05 | 3.8E-03 | 3,6                                             | RPS27L, SLAMF7, CALR, RPS6, MAGED1, ATF5, HSP90B1, VCP, TXNDC5, ERN1, UBC, UBB, HSPA5, TP53INP1                 |
| Protein transport                                     | GO:0008104--protein localization                                         | 2.3E-06 | 4.2E-04 | 4,0                                             | CALR, SEC63, SSR1, OS9, TRAM2, HSP90B1, VCP, TMED2, SRPR, USO1, SEC22B, SSRA, KDELR1, SEC61A1, SSR2, COPE, SSR3 |
|                                                       | GO:0015031--protein transport                                            | 1.9E-06 | 1.0E-03 | 4,4                                             | CALR, SEC63, SSR1, TRAM2, HSP90B1, VCP, TMED2, SRPR, USO1, SEC22B, SSRA, KDELR1, SEC61A1, SSR2, COPE, SSR3      |
|                                                       | GO:0045184--establishment of protein localization                        | 2.1E-06 | 5.7E-04 | 4,3                                             | CALR, SEC63, SSR1, TRAM2, HSP90B1, VCP, TMED2, SRPR, USO1, SEC22B, SSRA, KDELR1, SEC61A1, SSR2, COPE, SSR3      |
|                                                       | GO:0046907--intracellular transport                                      | 9.9E-06 | 8.7E-04 | 4,4                                             | CALR, SEC63, SSR1, VCP, SRPR, TXNDC5, USO1, SEC22B, SSRA, KDELR1, SEC61A1, COPE, SSR2, SSR3                     |
|                                                       | GO:0006465--signal peptide processing                                    | 3.7E-02 | 3.5E-01 | 52,0                                            | SEC11C, SPCS1                                                                                                   |
|                                                       | GO:0006605--protein targeting                                            | 5.2E-04 | 2.0E-02 | 6,8                                             | SRPR, CALR, SEC61A1, SSR2, SEC63, SSR1, SSR3                                                                    |
|                                                       | GO:0045047--protein targeting to ER                                      | 4.2E-02 | 3.7E-01 | 46,2                                            | SRPR, SEC61A1                                                                                                   |
|                                                       | GO:0006612--protein targeting to membrane                                | 1.7E-05 | 1.3E-03 | 31,5                                            | SRPR, SSR2, SEC63, SSR1, SSR3                                                                                   |
|                                                       | GO:0006613--cotranslational protein targeting to membrane                | 2.2E-05 | 1.3E-03 | 69,4                                            | SRPR, SSR2, SSR1, SSR3                                                                                          |
|                                                       | GO:0006886--intracellular protein transport                              | 9.3E-06 | 9.8E-04 | 6,1                                             | VCP, SRPR, USO1, CALR, SSRA, KDELR1, SEC61A1, SSR2, SEC63, SSR1, SSR3                                           |
|                                                       | GO:0034613--cellular protein localization                                | 2.1E-05 | 1.4E-03 | 5,6                                             | VCP, SRPR, USO1, CALR, SSRA, KDELR1, SEC61A1, SSR2, SEC63, SSR1, SSR3                                           |
|                                                       | GO:0070727--cellular macromolecule localization                          | 2.2E-05 | 1.2E-03 | 5,5                                             | VCP, SRPR, USO1, CALR, SSRA, KDELR1, SEC61A1, SSR2, SEC63, SSR1, SSR3                                           |
|                                                       | GO:0048193--Golgi vesicle transport                                      | 2.4E-02 | 3.0E-01 | 6,4                                             | VCP, TXNDC5, SEC22B, COPE                                                                                       |
|                                                       | GO:0051235--maintenance of location                                      | 3.4E-03 | 9.2E-02 | 13,0                                            | HSP90B1, CALR, KDELR1, OS9                                                                                      |
| GO:0006621--protein retention in ER lumen             | 3.3E-02                                                                  | 3.2E-01 | 59,5    | KDELR1, OS9                                     |                                                                                                                 |
| Protein catabolism                                    | GO:0006457--protein folding                                              | 1.5E-03 | 4.5E-02 | 7,1                                             | HSP90B1, DNAJB11, CALR, FKBP11, SEC63, FKBP2                                                                    |
|                                                       | GO:0030433--ER-associated protein catabolic process                      | 4.5E-06 | 6.0E-04 | 43,4                                            | HSP90B1, VCP, UBC, UBB, OS9                                                                                     |
|                                                       | GO:0010498--proteasomal protein catabolic process                        | 1.4E-03 | 4.5E-02 | 10,2                                            | HSP90B1, VCP, UBC, UBB, OS9                                                                                     |
|                                                       | GO:0043161--proteasomal ubiquitin-dependent protein catabolic process    | 1.4E-03 | 4.5E-02 | 10,2                                            | HSP90B1, VCP, UBC, UBB, OS9                                                                                     |
|                                                       | GO:0006511--ubiquitin-dependent protein catabolic process                | 2.8E-02 | 3.0E-01 | 4,3                                             | HSP90B1, VCP, UBC, UBB, OS9                                                                                     |
|                                                       | GO:0044265--cellular macromolecule catabolic process                     | 2.0E-02 | 2.8E-01 | 2,6                                             | HSP90B1, VCP, UBE2J1, UBC, UFC1, UBA5, UBB, ISG20, OS9                                                          |
|                                                       | GO:0009057--macromolecule catabolic process                              | 3.0E-02 | 3.1E-01 | 2,4                                             | HSP90B1, VCP, UBE2J1, UBC, UFC1, UBA5, UBB, ISG20, OS9                                                          |
|                                                       | GO:0019941--modification-dependent protein catabolic process             | 1.8E-02 | 2.8E-01 | 2,9                                             | HSP90B1, VCP, UBE2J1, UBC, UFC1, UBA5, UBB, OS9                                                                 |
|                                                       | GO:0043632--modification-dependent macromolecule catabolic process       | 1.8E-02 | 2.8E-01 | 2,9                                             | HSP90B1, VCP, UBE2J1, UBC, UFC1, UBA5, UBB, OS9                                                                 |
|                                                       | GO:0051603--proteolysis involved in cellular protein catabolic process   | 2.3E-02 | 3.0E-01 | 2,8                                             | HSP90B1, VCP, UBE2J1, UBC, UFC1, UBA5, UBB, OS9                                                                 |
| GO:0044257--cellular protein catabolic process        | 2.3E-02                                                                  | 3.0E-01 | 2,8     | HSP90B1, VCP, UBE2J1, UBC, UFC1, UBA5, UBB, OS9 |                                                                                                                 |
| GO:0030163--protein catabolic process                 | 2.7E-02                                                                  | 3.1E-01 | 2,7     | HSP90B1, VCP, UBE2J1, UBC, UFC1, UBA5, UBB, OS9 |                                                                                                                 |
| Response to unfolding & ER                            | GO:0006986--response to unfolded protein                                 | 4.6E-03 | 9.3E-02 | 11,7                                            | VCP, ERN1, DNAJC3, MANF                                                                                         |
|                                                       | GO:0051789--response to protein stimulus                                 | 1.4E-02 | 2.3E-01 | 7,8                                             | VCP, ERN1, DNAJC3, MANF                                                                                         |
|                                                       | GO:0006984--ER-nuclear signaling pathway                                 | 1.2E-02 | 2.2E-01 | 17,8                                            | VCP, ERN1, HSPA5                                                                                                |
|                                                       | GO:0034976--response to endoplasmic reticulum stress                     | 5.4E-04 | 1.9E-02 | 24,5                                            | VCP, ERN1, HSPA5, OS9                                                                                           |
| Protein modification (Ub, Glycosylation)              | GO:0016567--protein ubiquitination                                       | 1.9E-02 | 2.7E-01 | 7,0                                             | VCP, UBC, UBB, OS9                                                                                              |
|                                                       | GO:0032446--protein modification by small protein conjugation            | 2.5E-02 | 2.9E-01 | 6,3                                             | VCP, UBC, UBB, OS9                                                                                              |
|                                                       | GO:0070647--protein modification by small protein conjugation or removal | 4.0E-02 | 3.6E-01 | 5,2                                             | VCP, UBC, UBB, OS9                                                                                              |
|                                                       | GO:0018196--peptidyl-asparagine modification                             | 4.6E-02 | 4.0E-01 | 41,6                                            | STT3A, DDOST                                                                                                    |
|                                                       | GO:0018279--protein amino acid N-linked glycosylation via asparagine     | 4.6E-02 | 4.0E-01 | 41,6                                            | STT3A, DDOST                                                                                                    |
| GO:0006487--protein amino acid N-linked glycosylation | 1.8E-02                                                                  | 2.7E-01 | 14,2    | STT3A, FUT8, DDOST                              |                                                                                                                 |
| Others                                                | GO:0042062--long-term strengthening of neuromuscular junction            | 2.3E-02 | 3.0E-01 | 83,2                                            | UBC, UBB                                                                                                        |
|                                                       | GO:0008582--regulation of synaptic growth at neuromuscular junction      | 3.3E-02 | 3.2E-01 | 59,5                                            | UBC, UBB                                                                                                        |
|                                                       | GO:0045454--cell redox homeostasis                                       | 3.6E-02 | 3.4E-01 | 9,9                                             | P4HB, TXNDC11, TXNDC5                                                                                           |
|                                                       | GO:0006414--translational elongation                                     | 1.2E-02 | 2.1E-01 | 8,2                                             | RPL15, UBC, UBB, RPS6                                                                                           |
|                                                       | GO:0051208--sequestering of calcium ion                                  | 1.4E-02 | 2.4E-01 | 138,7                                           | HSP90B1, CALR                                                                                                   |
| GO:0051238--sequestering of metal ion                 | 3.3E-02                                                                  | 3.2E-01 | 59,5    | HSP90B1, CALR                                   |                                                                                                                 |

| BPC-up signature                   |                                                   |         |           |                                                    |                                                                                          |
|------------------------------------|---------------------------------------------------|---------|-----------|----------------------------------------------------|------------------------------------------------------------------------------------------|
| Category                           | GO term                                           | P-value | Benjamini | Fold Enrichment                                    | Genes                                                                                    |
| Cell cycle & mitosis               | GO:0007049--cell cycle                            | 9.4E-08 | 5.2E-05   | 6,3                                                | E2F2, KIFC1, CLSPN, RAN, MSH2, GMNN, BIRC5, SMC2, SPC24, PSMA2, SPC25, TUBB, MCM8, ZWINT |
|                                    | GO:0051726--regulation of cell cycle              | 1.3E-02 | 3.6E-01   | 5,2                                                | E2F2, MSH2, ZWINT, GMNN, BIRC5                                                           |
|                                    | GO:0000075--cell cycle checkpoint                 | 2.7E-02 | 5.3E-01   | 11,4                                               | MSH2, ZWINT, BIRC5                                                                       |
|                                    | GO:0022402--cell cycle process                    | 2.0E-05 | 1.8E-03   | 6,1                                                | SPC24, PSMA2, SPC25, KIFC1, TUBB, MSH2, RAN, ZWINT, BIRC5, SMC2                          |
|                                    | GO:0000278--mitotic cell cycle                    | 6.9E-06 | 7.7E-04   | 8,4                                                | SPC24, PSMA2, SPC25, KIFC1, TUBB, RAN, ZWINT, BIRC5, SMC2                                |
|                                    | GO:0051301--cell division                         | 1.6E-04 | 8.7E-03   | 8,2                                                | SPC24, SPC25, KIFC1, RAN, ZWINT, BIRC5, SMC2                                             |
|                                    | GO:0000280--nuclear division                      | 2.2E-06 | 6.2E-04   | 12,6                                               | SPC24, SPC25, KIFC1, TUBB, RAN, ZWINT, BIRC5, SMC2                                       |
|                                    | GO:0007067--mitosis                               | 2.2E-06 | 6.2E-04   | 12,6                                               | SPC24, SPC25, KIFC1, TUBB, RAN, ZWINT, BIRC5, SMC2                                       |
|                                    | GO:0000087--M phase of mitotic cell cycle         | 2.5E-06 | 4.7E-04   | 12,4                                               | SPC24, SPC25, KIFC1, TUBB, RAN, ZWINT, BIRC5, SMC2                                       |
|                                    | GO:0048285--organelle fission                     | 2.9E-06 | 4.1E-04   | 12,1                                               | SPC24, SPC25, KIFC1, TUBB, RAN, ZWINT, BIRC5, SMC2                                       |
|                                    | GO:0000279--M phase                               | 3.1E-05 | 2.5E-03   | 8,4                                                | SPC24, SPC25, KIFC1, TUBB, RAN, ZWINT, BIRC5, SMC2                                       |
| GO:0022403--cell cycle phase       | 1.3E-04                                           | 8.1E-03 | 6,7       | SPC24, SPC25, KIFC1, TUBB, RAN, ZWINT, BIRC5, SMC2 |                                                                                          |
| DNA replication, segregation       | GO:0006259--DNA metabolic process                 | 1.3E-02 | 3.7E-01   | 4,1                                                | CLSPN, MCM8, MSH2, RAN, RRM2, PCNA                                                       |
|                                    | GO:0006260--DNA replication                       | 1.6E-02 | 3.8E-01   | 7,3                                                | CLSPN, MCM8, RRM2, PCNA                                                                  |
|                                    | GO:0051052--regulation of DNA metabolic process   | 4.1E-02 | 6.7E-01   | 9,1                                                | MSH2, GMNN, PCNA                                                                         |
|                                    | GO:0000070--mitotic sister chromatid segregation  | 4.6E-03 | 1.9E-01   | 28,9                                               | KIFC1, ZWINT, SMC2                                                                       |
|                                    | GO:0000819--sister chromatid segregation          | 4.8E-03 | 1.9E-01   | 28,1                                               | KIFC1, ZWINT, SMC2                                                                       |
| GO:0007059--chromosome segregation | 7.5E-05                                           | 5.2E-03 | 21,4      | SPC25, KIFC1, ZWINT, BIRC5, SMC2                   |                                                                                          |
| Microtubule organization           | GO:0007017--microtubule-based process             | 5.4E-03 | 1.9E-01   | 6,9                                                | SPC25, KIFC1, TUBB, RAN, ZWINT                                                           |
|                                    | GO:0007052--mitotic spindle organization          | 4.1E-02 | 6.6E-01   | 46,2                                               | SPC25, RAN                                                                               |
|                                    | GO:0007051--spindle organization                  | 2.7E-04 | 1.3E-02   | 30,8                                               | SPC25, TUBB, RAN, ZWINT                                                                  |
|                                    | GO:0000226--microtubule cytoskeleton organization | 8.0E-03 | 2.6E-01   | 9,4                                                | SPC25, TUBB, RAN, ZWINT                                                                  |
| RNA catabolism                     | GO:0006401--RNA catabolic process                 | 1.4E-02 | 3.6E-01   | 16,0                                               | DCPS, PPP1R8, RNASE6                                                                     |
