# Supplementary material for: The transcriptional profiling of human in vivo-generated plasma cells identifies selective imbalances in monoclonal gammopathies
Source: PubMed Central journal article supplement (PMC5560601; doi:10.1371/journal.pone.0183264), 2017-08-17
Supplement: pone.0183264.s005.pdf [file pone.0183264.s005.pdf]

**Supplementary Table 3. Common PC genes between human and mouse.** See main text and legend of Figure 3 for further details.

| Gene     | PC-up |
|----------|-------|
| ATAT1    | x     |
| ATF5     |       |
| BST2     | x     |
| CALR     | x     |
| CDV3     |       |
| CLPTM1L  | x     |
| COPE     |       |
| DDOST    | x     |
| DENND5B  |       |
| DNAJB11  |       |
| DNAJC3   | x     |
| ELL2     | x     |
| ERN1     |       |
| FAM46C   | x     |
| FKBP11   |       |
| FKBP2    | x     |
| FNDC3B   | x     |
| FUT8     |       |
| HIST1H1C |       |
| HM13     | x     |
| HSP90B1  | x     |
| HSPA13   |       |
| HSPA5    | x     |
| HYOU1    |       |
| IDH2     |       |
| ISG20    |       |
| ITM2C    | x     |
| KDELRL1  |       |
| KRTCAP2  | x     |
| MAGED1   |       |
| MANF     | x     |
| MTDH     |       |
| MZB1     | x     |
| NDUFA1   |       |
| OS9      |       |
| P4HB     | x     |
| PRDM1    |       |
| REXO2    |       |
| RPL15    |       |
| RPS27L   |       |
| RPS6     |       |
| SDF2L1   | x     |
| SEC11C   | x     |
| SEC22B   | x     |
| SEC61A1  | x     |
| SEC63    |       |
| SLAMF7   | x     |
| SLC35B1  |       |
| SLC39A11 |       |
| SLC39A7  | x     |
| SLC44A1  | x     |
| SLC7A5   | x     |
| SND1     | x     |
| SNORD14E | x     |
| SNORD68  |       |
| SPCS1    | x     |
| SRPR     |       |
| SRPRB    | x     |
| SSR1     |       |
| SSR2     | x     |
| SSR3     | x     |
| SSR4     | x     |
| STT3A    |       |
| SURF4    |       |
| TMED2    |       |
| TMED9    | x     |
| TNFRSF17 |       |
| TP53INP1 | x     |
| TRAM2    |       |
| TRIB1    | x     |
| TXNDC11  | x     |
| TXNDC5   | x     |
| UBA5     | x     |
| UBB      | x     |
| UBC      | x     |
| UBE2J1   |       |
| UFC1     | x     |
| USO1     |       |
| VCP      |       |
| VIMP     | x     |
| XBP1     | x     |
| ZBP1     |       |
