# Supplementary material for: The transcriptional profiling of human in vivo-generated plasma cells identifies selective imbalances in monoclonal gammopathies
Source: PubMed Central journal article supplement (PMC5560601; doi:10.1371/journal.pone.0183264), 2017-08-17
Supplement: pone.0183264.s006.pdf [file pone.0183264.s006.pdf]

**Supplementary Table 4. PC subtypes signatures:**Differentially expressed genes (adjusted P-value < 0.1) in the pair-wise comparisons between PC subtypes. Black, specific genes; red, common genes (see main text).

**BPC-UP SIGNATURE**

| ProbeName    | log2FC BPC/TPC | adj.P-Val BPC/TPC | log2FC BPC/BMPC | adj.P-Val BPC/BMPC | Gene Symbol | Gene description                                             | Refseq & others | UNIGENE_ID |
|--------------|----------------|-------------------|-----------------|--------------------|-------------|--------------------------------------------------------------|-----------------|------------|
| A_23_P317620 | 4,61           | 0,012             | 4,20            | 0,036              | ARL4C       | ADP-ribosylation factor-like 4C                              | NM_005737       | Hs.709513  |
| A_23_P118815 | 3,04           | 0,012             | 2,60            | 0,052              | BIRC5       | baculoviral IAP repeat containing 5                          | NM_001012271    | Hs.514527  |
| A_24_P345993 | 5,27           | 0,030             | 4,71            | 0,078              | CANX        | calnexin                                                     | NM_001746       | Hs.699155  |
| A_24_P58759  | 3,79           | 0,047             | 4,38            | 0,038              | CCT5P1      |                                                              | XR_018279       |            |
| A_23_P109988 | 2,59           | 0,047             | 2,60            | 0,070              | CD86        | CD86 molecule                                                | NM_006889       | Hs.171182  |
| A_23_P126212 | 4,53           | 0,016             | 3,87            | 0,064              | CLSPN       | claspin                                                      | NM_022111       | Hs.175613  |
| A_24_P184799 | 4,17           | 0,012             | 3,65            | 0,042              | COCH        | cochlin                                                      | NM_004086       | Hs.21016   |
| A_23_P83624  | 4,98           | 0,021             | 4,83            | 0,046              | COTL1       | coactosin-like 1 (Dictyostelium)                             | NM_021149       | Hs.289092  |
| A_32_P462013 | 3,73           | 0,019             | 3,31            | 0,062              | CRACR2A     | BCL6 co-repressor-like 1                                     | AK021694        | Hs.504534  |
| A_24_P115762 | 2,96           | 0,098             | 3,17            | 0,099              | CTSC        | cathepsin C                                                  | NM_148170       | Hs.128065  |
| A_23_P52738  | 2,01           | 0,040             | 2,52            | 0,015              | DCPS        | decapping enzyme, scavenger                                  | NM_014026       | Hs.504249  |
| A_23_P30377  | 3,19           | 0,039             | 2,99            | 0,079              | DDX46       | DEAD (Asp-Glu-Ala-Asp) box polypeptide 46                    | NM_014829       | Hs.406549  |
| A_24_P343095 | 4,33           | 0,006             | 3,87            | 0,016              | DHFR        | dihydrofolate reductase                                      | NM_000791       | Hs.648635  |
| A_23_P500390 | 2,48           | 0,056             | 2,44            | 0,084              | DONSON      | downstream neighbor of SON                                   | NM_017613       | Hs.436341  |
| A_23_P408955 | 4,63           | 0,050             | 4,49            | 0,081              | E2F2        | E2F transcription factor 2                                   | NM_004091       | Hs.194333  |
| A_23_P9574   | 2,10           | 0,037             | 2,00            | 0,070              | ECT2        | epithelial cell transforming sequence 2 oncogene             | NM_018098       | Hs.518299  |
| A_23_P215009 | 4,02           | 0,008             | 3,86            | 0,015              | FAM65B      | family with sequence similarity 65, member B"                | AB002384        | Hs.559459  |
| A_23_P358394 | 0,00           |                   | 4,34            | 0,058              | FAM65B      | family with sequence similarity 65, member B                 | NM_015864       | Hs.559459  |
| A_24_P220575 | 3,28           | 0,015             | 2,75            | 0,066              | FHP1        | diacylglycerol kinase, eta                                   | BC044822        | Hs.659437  |
| A_23_P19712  | 1,98           | 0,029             | 2,36            | 0,015              | GMNN        | geminin, DNA replication inhibitor                           | NM_015895       | Hs.234896  |
| A_32_P87697  |                |                   | 6,06            | 0,001              | HLA-DRA     | major histocompatibility complex, class II, DR alpha         | NM_019111       | Hs.520048  |
| A_24_P364263 | 6,20           | 0,000             | 5,65            | 0,000              | HRASLS2     | HRAS-like suppressor 2                                       | NM_017878       | Hs.272805  |
| A_23_P133956 | 7,24           | 0,000             | 6,51            | 0,000              | KIFC1       | kinesin family member C1                                     | NM_002263       | Hs.436912  |
| A_23_P50638  | 2,10           | 0,015             |                 |                    | LRG1        | leucine-rich alpha-2-glycoprotein 1                          | NM_052972       | Hs.655559  |
| A_23_P363896 |                |                   | 3,67            | 0,000              | LRRC75A-AS1 | LRRC75A antisense RNA 1                                      | NR_027162       | Hs.368934  |
| A_24_P312072 | 4,72           | 0,014             | 4,19            | 0,055              | LYRM4       | LYR motif containing 4                                       | NM_020408       | Hs.709318  |
| A_23_P68547  | 2,98           | 0,083             | 3,13            | 0,089              | MCM8        | minichromosome maintenance complex component 8               | NM_182802       | Hs.631506  |
| A_23_P102471 | 2,30           | 0,031             | 2,15            | 0,061              | MSH2        | mutS homolog 2                                               | NM_000251       | Hs.597656  |
| A_23_P64010  | 5,87           | 0,035             | 5,34            | 0,081              | MTCH2       | mitochondrial carrier homolog 2 (C. elegans)                 | NM_014342       | Hs.269944  |
| A_23_P313993 | 1,17           | 0,055             | 1,12            | 0,091              | PAX2        | paired box 2                                                 | L25597          | Hs.155644  |
| A_23_P28886  | 4,97           | 0,042             | 5,15            | 0,058              | PCNA        | proliferating cell nuclear antigen                           | NM_002592       | Hs.147433  |
| A_24_P127462 | 3,99           | 0,036             | 3,97            | 0,060              | PCNAP3      |                                                              | XR_018314       |            |
| A_32_P147241 | 2,12           | 0,090             | 4,48            | 0,000              | PKM         | pyruvate kinase, muscle"                                     | NM_182470       | Hs.534770  |
| A_23_P12272  | 3,77           | 0,007             | 3,54            | 0,015              | PPP1R8      | protein phosphatase 1, regulatory subunit 8                  | NM_138558       | Hs.533474  |
| A_23_P256432 | 4,13           | 0,097             | 4,76            | 0,075              | PPP2R5A     | protein phosphatase 2, regulatory subunit B', alpha isoform" | NM_006243       | Hs.716433  |
| A_23_P207307 | 2,14           | 0,095             | 2,84            | 0,042              | PRR11       | proline rich 11                                              | AK001891        | Hs.631750  |
| A_23_P345591 | 4,28           | 0,078             | 5,21            | 0,046              | PSMA2       | proteasome (prosome, macropain) subunit, alpha type, 2       | NM_002787       | Hs.333786  |
| A_24_P587882 | 3,94           | 0,012             | 3,87            | 0,015              | PSMA2P2     |                                                              |                 |            |
| A_24_P47547  | 5,13           | 0,070             |                 |                    | RAN         | RAN, member RAS oncogene family                              | NM_006325       | Hs.10842   |
| A_32_P506600 | 3,40           | 0,068             | 3,55            | 0,076              | RAN         | RAN, member RAS oncogene family                              | NM_006325       | Hs.10842   |
| A_23_P209944 | 2,50           | 0,059             | 2,75            | 0,058              | RETSAT      | retinol saturase (all-trans-retinol 13,14-reductase)         | NM_017750       | Hs.440401  |
| A_23_P3014   | 2,44           | 0,083             | 3,32            | 0,021              | RNASE6      | ribonuclease, RNase A family, k6                             | NM_005615       | Hs.23262   |
| A_24_P234196 | 7,08           | 0,000             | 6,26            | 0,000              | RRM2        | ribonucleotide reductase M2 polypeptide                      | NM_001034       | Hs.226390  |
| A_23_P103522 | 3,00           | 0,030             | 3,11            | 0,045              | SELL        | selectin L                                                   | NM_000655       | Hs.82848   |

|              |      |       |      |       |           |                                                                  |                |           |
|--------------|------|-------|------|-------|-----------|------------------------------------------------------------------|----------------|-----------|
| A_32_P96719  | 4,96 | 0,007 | 5,31 | 0,004 | SHCBP1    | SHC SH2-domain binding protein 1                                 | NM_024745      | Hs.123253 |
| A_23_P308519 | 3,06 | 0,014 | 3,08 | 0,019 | SLC9A3R1  | solute carrier family 9 (sodium/hydrogen exchanger), member 3 re | NM_004252      | Hs.715489 |
| A_23_P60271  | 3,51 | 0,013 | 3,39 | 0,024 | SMC2      | structural maintenance of chromosomes 2                          | NM_001042550   | Hs.119023 |
| A_23_P123874 | 3,23 | 0,095 |      |       | SMU1      | smu-1 suppressor of mec-8 and unc-52 homolog (C. elegans)        | NM_018225      | Hs.655351 |
| A_32_P68746  | 3,22 | 0,030 | 3,02 | 0,066 | SMU1      | smu-1 suppressor of mec-8 and unc-52 homolog (C. elegans)        | NM_018225      | Hs.655351 |
| A_24_P314571 | 5,85 | 0,002 | 3,71 | 0,070 | SPC24     | SPC24, NDC80 kinetochore complex component                       | ENST0000059254 | Hs.381225 |
| A_23_P51085  | 2,72 | 0,004 | 2,54 | 0,010 | SPC25     | SPC25, NDC80 kinetochore complex component                       | NM_020675      | Hs.421956 |
| A_24_P407645 | 4,16 | 0,030 | 4,83 | 0,016 | SPN       | sialophorin                                                      | NM_001030288   | Hs.632188 |
| A_23_P346093 | 4,41 | 0,042 | 4,50 | 0,060 | TMC8      | transmembrane channel-like 8                                     | NM_152468      | Hs.592102 |
| A_24_P242076 | 3,56 | 0,092 | 3,94 | 0,079 | TMEM50A   |                                                                  | AK074960       |           |
| A_23_P84705  | 5,91 | 0,022 |      |       | TNFRSF13B | tumor necrosis factor receptor superfamily, member 13B           | NM_012452      | Hs.158341 |
| A_23_P37736  |      |       | 3,67 | 0,069 | TNFRSF17  | tumor necrosis factor receptor superfamily, member 17            | NM_001192      | Hs.2556   |
| A_23_P132226 | 3,27 | 0,072 | 3,56 | 0,066 | TPST2     | tyrosylprotein sulfotransferase 2                                | NM_001008566   | Hs.716478 |
| A_23_P323761 | 4,33 | 0,025 | 4,99 | 0,015 | TRAF3IP3  | TRAF3 interacting protein 3                                      | NM_025228      | Hs.147434 |
| A_23_P334414 | 3,84 | 0,028 | 3,86 | 0,046 | TRAF3IP3  | TRAF3 interacting protein 3                                      | NM_025228      | Hs.147434 |
| A_23_P104025 | 1,92 | 0,094 | 2,52 | 0,042 | TSEN15    | TSEN15 tRNA splicing endonuclease subunit                        | NM_052965      | Hs.548197 |
| A_23_P387057 | 4,03 | 0,017 | 4,80 | 0,008 | TUBB      | tubulin, beta class I                                            | NM_178014      | Hs.636480 |
| A_23_P81912  | 3,35 | 0,090 |      |       | TUBB      | tubulin, beta class I                                            | NM_178014      | Hs.636480 |
| A_23_P68866  | 3,70 | 0,096 | 4,17 | 0,079 | UQCR10    | ubiquinol-cytochrome c reductase, complex III subunit X          | NM_001003684   | Hs.284292 |
| A_23_P99405  | 2,66 | 0,042 | 2,89 | 0,046 | ZMYM2     | zinc finger, MYM-type 2                                          | NM_003453      | Hs.644041 |
| A_23_P63789  | 4,23 | 0,012 | 5,29 | 0,001 | ZWINT     | ZW10 interacting kinetochore protein                             | NM_032997      | Hs.591363 |

#### TPC-UP SIGNATURE

| ProbeName    | log2FC TPC/BPC | adj.P-ValTPC/BPC | log2FC TPC/BMPC | adj.P-Val tTPC/BMPC | Gene Symbol   | Gene description                                      | Refseq & others | UNIGENE_ID |
|--------------|----------------|------------------|-----------------|---------------------|---------------|-------------------------------------------------------|-----------------|------------|
| A_23_P98686  | 3,800          | 0,081            |                 |                     | ATHL1         | ATH1, acid trehalase-like 1 (yeast)                   | NM_025092       | Hs.353181  |
| A_24_P288915 | 8,391          | 0,000            | 6,335           | 0,016               | CCDC144A      | coiled-coil domain containing 144B                    | ENST0000044575  | Hs.649499  |
| A_24_P49647  | 4,967          | 0,024            |                 |                     | CCDC144A      | coiled-coil domain containing 144A                    | AB011137        | Hs.419859  |
| A_24_P75917  | 7,377          | 0,000            | 5,80            | 0,012               | CCDC144A      | coiled-coil domain containing 144A                    | NM_014695       | Hs.419859  |
| A_32_P216369 | 4,309          | 0,073            |                 |                     | CCDC144A      | coiled-coil domain containing 144A                    | ENST0000036052  | Hs.419859  |
| A_23_P209055 | 7,046          | 0,000            | 8,64            | 0,000               | CD22          | CD22 molecule                                         | NM_001771       | Hs.579691  |
| A_23_P351286 | 4,898          | 0,052            |                 |                     | CD22          | CD22 molecule                                         | AK026467        |            |
| A_24_P659036 | 3,405          | 0,030            | 3,78            | 0,044               | DENND6B       | DENN/MADD domain containing 6B                        | NM_001001794    | Hs.530380  |
| A_23_P51856  | 4,327          | 0,070            | 5,45            | 0,051               | DUSP10        | dual specificity phosphatase 10                       | NM_007207       | Hs.497822  |
| A_24_P37409  | 3,601          | 0,070            |                 |                     | DUSP2         | dual specificity phosphatase 2                        | NM_004418       | Hs.1183    |
| A_23_P214080 | 5,243          | 0,002            |                 |                     | EGR1          | early growth response 1                               | NM_001964       | Hs.326035  |
| A_23_P347623 | 4,017          | 0,016            |                 |                     | ERO1LB        | ERO1-like beta (S. cerevisiae)                        | NM_019891       | Hs.558519  |
| A_23_P66827  | 4,235          | 0,001            | 3,46            | 0,016               | FAM106A       | family with sequence similarity 106, member A         | NR_026809       | Hs.674403  |
| A_23_P80048  | 4,441          | 0,005            |                 |                     | FER1L4        | fer-1-like family member 4, pseudogene (functional)   | NR_119376       | Hs.72222   |
| A_23_P429998 | 2,295          | 0,037            |                 |                     | FOSB          | FBJ murine osteosarcoma viral oncogene homolog B      | NM_006732       | Hs.590958  |
| A_24_P350186 | 2,455          | 0,036            |                 |                     | HID1          | chromosome 17 open reading frame 28                   | NM_030630       | Hs.11067   |
| A_32_P87697  |                |                  | 7,12            | 0,000               | HLA-DRA       | major histocompatibility complex, class II, DR alpha  | NM_019111       | Hs.520048  |
| A_23_P403424 | 3,412          | 0,098            |                 |                     | JMJD7-PLA2G4B | JMJD7-PLA2G4B readthrough                             | NM_005090       | Hs.198161  |
| A_24_P203418 | 1,542          | 0,076            |                 |                     | LOC100131845  | similar to hCG1742309                                 | ENST0000061737  | Hs.547094  |
| A_23_P363896 |                |                  | 2,68            | 0,016               | LRRC75A-AS1   | LRRC75A antisense RNA 1                               | NR_027162       | Hs.368934  |
| A_23_P118791 | 3,449          | 0,021            |                 |                     | SNORD118      | transmembrane protein 107                             | NM_032354       | Hs.513933  |
| A_23_P37736  |                |                  | 4,11            | 0,068               | TNFRSF17      | tumor necrosis factor receptor superfamily, member 17 | NM_001192       | Hs.2556    |
| A_23_P217688 | 3,109          | 0,055            |                 |                     | TSC22D3       | TSC22 domain family, member 3"                        | NM_004089       | Hs.716410  |
| A_23_P207666 | 4,211          | 0,016            | 3,76            | 0,097               | USP32         | ubiquitin specific peptidase 32                       | NM_032582       | Hs.448851  |

|              |       |       |  |  |              |                                    |           |           |
|--------------|-------|-------|--|--|--------------|------------------------------------|-----------|-----------|
| A_23_P431630 | 3,717 | 0,016 |  |  | USP32        | ubiquitin specific peptidase 32    | NM_032582 | Hs.132868 |
| A_24_P344537 | 1,599 | 0,048 |  |  | ZNF625-ZNF20 | zinc finger protein 625            | NM_145233 | Hs.512823 |
| A_23_P101623 | 2,031 | 0,013 |  |  | ZNF667       | zinc finger protein 667            | NM_022103 | Hs.712574 |
| A_24_P153207 | 2,152 | 0,010 |  |  | ZNF850       | zinc finger protein 850 pseudogene | CR627133  | Hs.406307 |

**BMPC-UP SIGNATURE**

| ProbeName    | log2FC BMPC/BPC | adj.P-Val BMPC/BPC | log2FC BMPC/TPC | adj.P-ValBMPC/TPC | Gene Symbol   | Gene description                                          | Refseq & others | UNIGENE_ID |
|--------------|-----------------|--------------------|-----------------|-------------------|---------------|-----------------------------------------------------------|-----------------|------------|
| A_23_P98686  | 4,47            | 0,058              |                 |                   | ATHL1         | ATH1, acid trehalase-like 1 (yeast)                       | NM_025092       | Hs.353181  |
| A_23_P87982  | 3,16            | 0,015              | 2,67            | 0,068             | ATP12A        | ATPase, H+/K+ transporting, nongastric, alpha polypeptide | NM_001676       | Hs.147111  |
| A_24_P37409  | 3,78            | 0,076              |                 |                   | DUSP2         | dual specificity phosphatase 2                            | NM_004418       | Hs.1183    |
| A_23_P214080 | 5,51            | 0,001              |                 |                   | EGR1          | early growth response 1                                   | NM_001964       | Hs.326035  |
| A_23_P347623 | 3,21            | 0,082              |                 |                   | ERO1LB        | ERO1-like beta (S. cerevisiae)                            | NM_019891       | Hs.558519  |
| A_23_P80048  | 5,88            | 0,000              |                 |                   | FER1L4        | fer-1-like family member 4, pseudogene (functional)       | NR_119376       | Hs.72222   |
| A_24_P23454  | 5,42            | 0,060              |                 |                   | FER1L4        |                                                           |                 |            |
| A_23_P429998 | 2,68            | 0,021              |                 |                   | FOSB          | FBJ murine osteosarcoma viral oncogene homolog B          | NM_006732       | Hs.590958  |
| A_24_P350186 | 3,15            | 0,012              |                 |                   | HID1          | chromosome 17 open reading frame 28                       | NM_030630       | Hs.11067   |
| A_23_P403424 | 3,76            | 0,089              |                 |                   | JMJD7-PLA2G4B | JMJD7-PLA2G4B readthrough                                 | NM_005090       | Hs.198161  |
| A_24_P203418 | 1,63            | 0,079              |                 |                   | LOC100131845  | similar to hCG1742309                                     | ENST0000061737  | Hs.547094  |
| A_23_P118791 | 3,53            | 0,032              |                 |                   | SNORD118      | transmembrane protein 107                                 | NM_032354       | Hs.513933  |
| A_23_P84705  |                 |                    | -5,757097209    | 0,074             | TNFRSF13B     | tumor necrosis factor receptor superfamily, member 13B    | NM_012452       | Hs.158341  |
| A_23_P217688 | 3,35            | 0,060              |                 |                   | TSC22D3       | TSC22 domain family, member 3"                            | NM_004089       | Hs.716410  |
| A_24_P344537 | 1,56            | 0,079              |                 |                   | ZNF625-ZNF20  | zinc finger protein 625                                   | NM_145233       | Hs.512823  |
| A_23_P101623 | 1,56            | 0,081              |                 |                   | ZNF667        | zinc finger protein 667                                   | NM_022103       | Hs.712574  |
| A_24_P153207 | 1,72            | 0,058              |                 |                   | ZNF850        | zinc finger protein 850 pseudogene                        | CR627133        | Hs.406307  |
